# Supplementary material for: Construction of chiralN,O-hemiaminalsviaa copper-catalyzed enantioselective Michael/N-hemiacetalization cascade reaction
Source: Royal Society of Chemistry journal article supplement (doi:10.1039/d3ob00542a), 2023-01-01
Supplement: d3ob00542a1.pdf [file d3ob00542a1.pdf]

# Supporting Information

## Construction of Chiral *N,O*-Hemiaminals via Copper-Catalyzed Enantioselective Michael/*N*-Hemiacetalization Cascade Reaction

Kuiliang Li, Siyu Gao, Zhenggen Zha and Zhiyong Wang\*

[a] Hefei National Laboratory for Physical Sciences at Microscale, CAS Key Laboratory of Soft Matter Chemistry & Center for Excellence in Molecular Synthesis of Chinese Academy of Sciences, School of Chemistry and Materials Science in University of Science and Technology of China, Hefei, Anhui 230026, P. R. China

Fax: (+86)551-63603185  
E-mail: zwang3@ustc.edu.cn

### Table of Contents

|                                                                              |    |
|------------------------------------------------------------------------------|----|
| Part I Experimental Section .....                                            | 2  |
| 1.1 General information .....                                                | 2  |
| 1.2 Optimization of reaction conditions .....                                | 3  |
| 1.3 General working procedure .....                                          | 3  |
| 1.4 Experimental data of products .....                                      | 4  |
| 1.5 A plausible structure of the transition state and DFT calculations. .... | 13 |
| Part II NMR spectra .....                                                    | 37 |
| Part III HPLC Spectra .....                                                  | 62 |
| Part IV Crystal data .....                                                   | 78 |

# Part I Experimental Section

## 1.1 General information

<sup>1</sup>H NMR and <sup>13</sup>C NMR were recorded on Bruker-500 MHz Spectrometer (<sup>1</sup>H NMR: 500MHz, <sup>13</sup>C NMR: 125MHz, <sup>19</sup>F NMR: 470MHz) using TMS as internal reference. The chemical shifts ( $\delta$ ) and coupling constants ( $J$ ) were expressed in ppm and Hz respectively. Uv-Vis Spectrophotometry was carried out on Shimadzu UV-3000. HPLC analysis was carried out on an Agilent 1260 series HPLC with a multiple wavelength detector. Chiralpak AD-H, IC were purchased from Daicel Chemical Industries, LTD. Optical rotations were measured on a PerKinElmer<sup>TM</sup> Polarimeter (Model 343). Commercially available compounds were used without further purification. All solvents were purified according to the standard procedures unless otherwise noted. 2-hydroxy-3-(trifluoromethyl)benzaldehyde<sup>[1a]</sup>, Ligands **L**<sub>1</sub>-**L**<sub>6</sub><sup>[1b]</sup>, **L**<sub>1</sub>'<sup>[1c]</sup>,  $\beta,\gamma$ -unsaturated  $\alpha$ -ketoesters<sup>[1c]</sup>, 5-aminoisoxazoles<sup>[1d]</sup> were prepared according to the literature procedures.

---

[1] (a) Daly, A.; Renehan, M. D.; Gilheany, D. G. High Enantioselectivities in an(E)-Alkene Epoxidation by Catalytically Active Chromium Salen Complexes. Insight into the Catalytic Cycle. *Org. Lett.*, 2001, **3**, 663-666; (b) Lai, G. Y.; Guo, F. F.; Zheng, Y. Q.; Fang, Y.; Song, H. G.; Xu, K.; Wang, S. J.; Zha, Z. G.; Wang, Z. Y. Enantioselective and Regioselective Friedel-Crafts Alkylation of Pyrroles with Nitroalkenes Catalyzed by a Tridentate Schiff Base-Copper Complex. *Chem. Eur. J.*, 2011, **17**, 1114-1117; (c) Zhang, S.; Xu, K.; Guo, F. F.; Hu, Y. B.; Zha, Z. G.; Wang, Z. Y. Enantioselective Copper(I/II)-Catalyzed Conjugate Addition of Nitro Esters to  $\beta,\gamma$ -Unsaturated  $\alpha$ -Ketoesters. *Chem. Eur. J.*, 2014, **20**, 979-982; (d) Liu, H.; Yan, Y. K.; Li, M.; Zhang, X. M.; An enantioselective aza-Friedel-Crafts reaction of 5-aminoisoxazoles with isatin-derived *N*-Boc ketimines. *Org. Biomol. Chem.*, 2021, **19**, 3820-3824.

## 1.2 Optimization of reaction conditions

**Table 1.** Effects of copper salts and ligand <sup>a</sup>

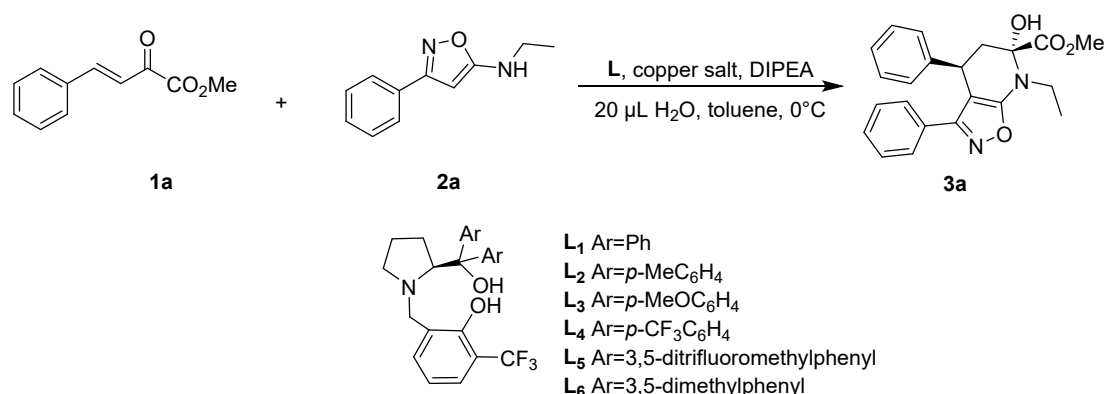

| Entry | Ligand         | Copper salt                                            | Yield (%) <sup>b</sup> | ee (%) <sup>d</sup> |
|-------|----------------|--------------------------------------------------------|------------------------|---------------------|
| 1     | L <sub>1</sub> | Cu(OTf) <sub>2</sub>                                   | 95%                    | 96%                 |
| 2     | L <sub>1</sub> | CuBr <sub>2</sub>                                      | 94%                    | 94%                 |
| 3     | L <sub>1</sub> | Cu(CH <sub>3</sub> COO) <sub>2</sub> ·H <sub>2</sub> O | 91%                    | 90%                 |
| 4     | L <sub>1</sub> | CuSO <sub>4</sub> ·5H <sub>2</sub> O                   | 95%                    | 95%                 |
| 5     | L <sub>2</sub> | Cu(OTf) <sub>2</sub>                                   | 94%                    | 91%                 |
| 6     | L <sub>3</sub> | Cu(OTf) <sub>2</sub>                                   | 87%                    | 86%                 |
| 7     | L <sub>4</sub> | Cu(OTf) <sub>2</sub>                                   | 68%                    | 57%                 |
| 8     | L <sub>5</sub> | Cu(OTf) <sub>2</sub>                                   | 20%                    | 43%                 |
| 9     | L <sub>6</sub> | Cu(OTf) <sub>2</sub>                                   | 84%                    | 81%                 |

<sup>a</sup>Unless otherwise noted, the reaction of **1a** (0.1 mmol) and **2a** (0.15 mmol) was performed in the presence of **L** (10 mol %), DIPEA (10 mol %), copper salt (10 mol %) and 20 μL H<sub>2</sub>O in toluene (1.0 mL) for 48 h. All *dr* = 7:1. *dr* was determined by <sup>1</sup>H NMR of the crude product. <sup>b</sup>Isolated yield. <sup>c</sup>Determined by chiral HPLC analysis.

## 1.3 General working procedure

A mixture of Cu(OTf)<sub>2</sub> (3.6 mg, 0.01 mmol) and the ligand (**L**<sub>1</sub>, 4.3 mg, 0.01 mmol) in toluene (1 mL) with DIPEA (1.74 μL, 0.01 mmol) and 20 μL H<sub>2</sub>O was stirred at room temperature for 2 h. β, γ-unsaturated α-ketoester **1a** (19.0 mg, 0.1 mmol) was then added and the resulting mixture was cooled to 0°C. After stirring the mixture for 0.5 h, 5-aminoisoxazole **2a** (28.2 mg, 0.15 mmol) was added in one portion. After the reaction was complete (monitored by TLC), the reaction mixture was evaporated in vacuo. Purification of the residue by column chromatography afforded the desired product **3a** (35.9 mg, 95% yield) as a white solid.

## 1.4 Experimental data of products

### methyl(4*R*,6*R*)-7-ethyl-6-hydroxy-3,4-diphenyl-4,5,6,7-tetrahydroisoxazolo[5,4-*b*]pyridine-6-carboxylate (3a)

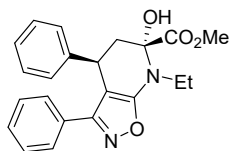

The title compound was prepared according to the general working procedure and purified by column chromatography (ethyl acetate/petroleum ether) to give the product as white solid (35.9 mg, 95% yield).  $[\alpha]_D^{20}$  -26.1 ( $c = 0.2$ ,  $\text{CHCl}_3$ , 96% *ee*); MP: 135-137°C; HPLC: Daicel Chiralpak IC, hexane: 2-propanol = 90:10, flow rate = 1.0 mL/min,  $T = 30^\circ\text{C}$ , UV = 254 nm,  $t_R = 14.3$  min (minor),  $t_R = 20.0$  min (major);  $^1\text{H NMR}$  (500 MHz, Acetone- $d_6$ )  $\delta$  7.41 – 7.36 (m, 2H), 7.20 – 7.09 (m, 7H), 7.08 – 6.99 (m, 1H), 5.87 (s, 0.7H, major), 5.69 (s, 0.1H, minor), 4.41 – 4.35 (m, 1H), 3.84 (s, 0.4H, minor), 3.56 (s, 2.6H, major), 3.53 – 3.37 (m, 2H), 2.66 (dd,  $J = 13.6, 6.1$  Hz, 0.13H, minor), 2.40 – 2.34 (m, 1.74H, major), 2.26 (dd,  $J = 13.6, 8.5$  Hz, 0.13H, minor), 1.35 – 1.31 (m, 3H).  $^{13}\text{C NMR}$  (125 MHz, Acetone- $d_6$ )  $\delta$  171.1, 167.1, 160.7, 142.4, 130.0, 128.7, 128.1, 127.9, 127.9, 127.6, 126.4, 88.5, 86.4, 52.3, 44.5, 40.3, 34.4, 15.0. HRMS (ESI)  $m/z$  calcd for  $\text{C}_{22}\text{H}_{22}\text{N}_2\text{O}_4$   $[\text{M}+\text{H}]^+$  379.1652, found 379.1660.

### methyl(4*R*,6*R*)-6-hydroxy-7-methyl-3,4-diphenyl-4,5,6,7-tetrahydroisoxazolo[5,4-*b*]pyridine-6-carboxylate (3b)

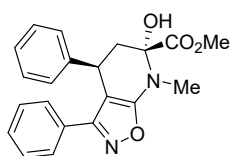

The title compound was prepared according to the general working procedure and purified by column chromatography (ethyl acetate/petroleum ether) to give the product as white solid (34.9 mg, 96% yield).  $[\alpha]_D^{20}$  -1.6 ( $c = 0.5$ ,  $\text{CHCl}_3$ , 96% *ee*); MP: 139-141°C; HPLC: Daicel Chiralpak AD-H, hexane: 2-propanol = 80:20, flow rate = 1.0 mL/min,  $T = 30^\circ\text{C}$ , UV = 254 nm,  $t_R = 8.0$  min (minor),  $t_R = 9.9$  min (major);  $^1\text{H NMR}$  (500 MHz, Acetone- $d_6$ )  $\delta$  7.41 – 7.36 (m, 2H), 7.20 – 7.11 (m, 7H), 7.07 – 7.01 (m, 1H), 5.95 (s, 0.75H, major), 5.73 (s, 0.15H, minor), 4.43 – 4.35 (m, 1H), 3.84 (s, 0.5H, minor), 3.57 (s, 2.5H, major), 3.06 (s, 0.5H, minor), 3.04 (s, 2.5H, major), 2.42 – 2.34 (m, 2H).  $^{13}\text{C NMR}$  (125 MHz, Acetone- $d_6$ )  $\delta$  170.7, 167.2, 161.0, 142.5, 129.9, 128.8, 128.2, 127.9, 127.9, 127.6, 126.4, 88.9, 85.9, 52.4, 44.1, 34.4, 29.5. HRMS (ESI)  $m/z$  calcd for  $\text{C}_{21}\text{H}_{20}\text{N}_2\text{O}_4$   $[\text{M}+\text{H}]^+$  365.1496, found 365.1496.

### methyl(4*R*,6*R*)-7-benzyl-6-hydroxy-3,4-diphenyl-4,5,6,7-tetrahydroisoxazolo[5,4-*b*]pyridine-6-carboxylate (3c)

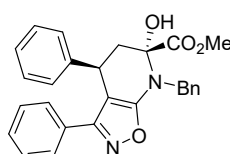

The title compound was prepared according to the general working procedure and purified by column chromatography (ethyl acetate/petroleum ether) to give the product as white solid (42.2 mg, 96% yield).  $[\alpha]_D^{20}$  -25.4 ( $c = 0.5$ ,  $\text{CHCl}_3$ , 97% *ee*); MP: 63-65°C; HPLC: Daicel Chiralpak IC, hexane: 2-propanol = 80:20, flow rate = 1.0 mL/min,  $T = 30^\circ\text{C}$ , UV = 254 nm,  $t_R = 8.4$  min (minor),  $t_R = 14.5$  min (major);  $^1\text{H NMR}$  (500 MHz, Acetone- $d_6$ )  $\delta$  7.51 – 7.45 (m, 2H), 7.44 – 7.38 (m, 2H),

7.38 – 7.33 (m, 2H), 7.29 – 7.24 (m, 1H), 7.22 – 7.02 (m, 8H), 6.27 (s, 0.28H, major), 6.19 (s, 0.04H, minor), 4.76 – 4.55 (m, 2H), 4.50 – 4.37 (m, 1H), 3.70 (s, 0.38H, minor), 3.25 (s, 2.62H, major), 2.78 (dd,  $J = 13.6, 6.1$  Hz, 0.12H, minor), 2.62 – 2.46 (m, 1.76H, major), 2.37 (dd,  $J = 13.6, 9.4$  Hz, 0.12H, minor).  $^{13}\text{C}$  NMR (125 MHz, Acetone- $d_6$ )  $\delta$  170.7, 167.3, 160.8, 142.4, 138.7, 129.9, 128.8, 128.2, 128.2, 128.0, 127.9, 127.6, 127.5, 127.0, 126.4, 88.9, 85.9, 52.0, 48.3, 44.1, 34.3. HRMS (ESI)  $m/z$  calcd for  $\text{C}_{27}\text{H}_{24}\text{N}_2\text{O}_4$   $[\text{M}+\text{H}]^+$  441.1809, found 441.1810.

**ethyl(4*R*,6*R*)-7-benzyl-6-hydroxy-3,4-diphenyl-4,5,6,7-tetrahydroisoxazolo[5,4-b]pyridine-6-carboxylate (3d)**

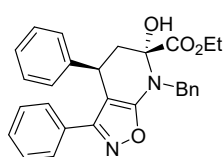

The title compound was prepared according to the general working procedure and purified by column chromatography (ethyl acetate/petroleum ether) to give the product as white solid (42.2 mg, 93% yield).  $[\alpha]_{\text{D}}^{20}$  -19.0 ( $c = 0.5$ ,  $\text{CHCl}_3$ , 97% *ee*); HPLC: Daicel Chiralpak IC, hexane: 2-propanol = 80:20, flow rate = 1.0 mL/min,  $T = 30^\circ\text{C}$ , UV = 254 nm,  $t_{\text{R}} = 8.6$  min (minor),  $t_{\text{R}} = 16.7$  min (major);  $^1\text{H}$  NMR (500 MHz, Acetone- $d_6$ )  $\delta$  7.54 – 7.47 (m, 2H), 7.41 – 7.33 (m, 4H), 7.29 – 7.26 (m, 1H), 7.21 – 7.11 (m, 7H), 7.08 – 7.02 (m, 1H), 6.08 (s, 0.48H, major), 5.98 (s, 0.16H, minor), 4.82 – 4.56 (m, 2H), 4.50 – 4.39 (m, 1H), 4.25 – 4.17 (m, 0.25H, minor), 3.91 – 3.86 (m, 0.25H, minor), 3.91 – 3.86 (m, 0.75H, major), 3.63 – 3.55 (m, 0.75H, major), 2.79 (dd,  $J = 13.6, 6.1$  Hz, 0.25H, minor), 2.60 – 2.43 (m, 1.5H, major), 2.37 (dd,  $J = 13.6, 9.0$  Hz, 0.25H, minor), 1.24 (t,  $J = 7.1$  Hz, 0.75H, minor), 0.96 (t,  $J = 7.1$  Hz, 2.25H, major).

major  $^{13}\text{C}$  NMR (125 MHz, Acetone- $d_6$ )  $\delta$  170.3, 167.3, 160.8, 142.5, 138.7, 129.9, 128.8, 128.2, 127.9, 127.9, 127.9, 127.6, 127.5, 127.0, 126.4, 89.1, 86.0, 61.9, 48.4, 44.3, 34.5, 13.0.

minor  $^{13}\text{C}$  NMR (125 MHz, Acetone- $d_6$ )  $\delta$  170.6, 167.4, 160.7, 143.0, 139.0, 130.0, 128.7, 128.2, 127.9, 127.9, 127.8, 127.7, 127.6, 127.0, 126.3, 89.0, 86.5, 62.0, 47.1, 45.3, 35.4, 13.4.

HRMS (ESI)  $m/z$  calcd for  $\text{C}_{28}\text{H}_{26}\text{N}_2\text{O}_4$   $[\text{M}+\text{Na}]^+$  477.1785, found 477.1790.

**isopropyl(4*R*,6*R*)-7-benzyl-6-hydroxy-3,4-diphenyl-4,5,6,7-tetrahydroisoxazolo[5,4-b]pyridine-6-carboxylate (3e)**

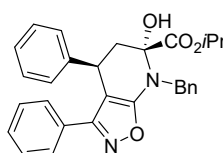

The title compound was prepared according to the general working procedure and purified by column chromatography (ethyl acetate/petroleum ether) to give the product as white solid (40.7 mg, 87% yield).  $[\alpha]_{\text{D}}^{20}$  -16.8 ( $c = 0.5$ ,  $\text{CHCl}_3$ , 93% *ee*); MP: 149–151°C; HPLC: Daicel Chiralpak IC, hexane: 2-propanol = 80:20, flow rate = 1.0 mL/min,  $T = 30^\circ\text{C}$ , UV = 254 nm,  $t_{\text{R}} = 8.5$  min (minor),  $t_{\text{R}} = 17.5$  min (major);  $^1\text{H}$  NMR (500 MHz, Acetone- $d_6$ )  $\delta$  7.54 – 7.47 (m, 2H), 7.40 – 7.33 (m, 4H), 7.31 – 7.27 (m, 1H), 7.21 – 7.16 (m, 3H), 7.15 – 7.09 (m, 4H), 7.08 – 7.03 (m, 1H), 6.04 (s, 0.66H, major), 5.99 (s, 0.13H, minor), 4.90 – 4.54 (m, 3H), 4.47 (dd,  $J = 9.0, 6.4$  Hz, 0.84H, major), 4.41 (dd,  $J = 9.1, 6.1$  Hz, 0.16H, minor), 2.79 (dd,  $J = 13.6, 6.3$  Hz, 0.16H, minor), 2.53 – 2.40 (m, 1.68H, major), 2.37 (dd,  $J = 13.8, 9.1$ , 0.16H,

minor), 1.28 (d,  $J = 6.2$  Hz, 0.5H, minor), 1.22 (d,  $J = 6.2$  Hz, 0.5H, minor), 1.13 (d,  $J = 6.3$  Hz, 2.5H, major), 0.86 (d,  $J = 6.3$  Hz, 2.5H, major).

major  $^{13}\text{C}$  NMR (125 MHz, Acetone- $d_6$ ) 170.0, 167.3, 160.8, 142.5, 138.6, 129.9, 128.7, 128.2, 128.2, 127.9, 127.8, 127.7, 127.4, 127.0, 126.5, 89.6, 86.4, 70.4, 48.7, 44.5, 34.7, 21.0, 20.8.

minor  $^{13}\text{C}$  NMR (125 MHz, Acetone- $d_6$ ) 170.1, 167.5, 160.7, 143.0, 139.1, 130.0, 128.7, 128.2, 128.2, 127.9, 127.8, 127.7, 127.5, 126.9, 126.3, 89.1, 86.7, 70.1, 47.2, 45.4, 35.5, 20.7, 20.4.

HRMS (ESI)  $m/z$  calcd for  $\text{C}_{29}\text{H}_{28}\text{N}_2\text{O}_4$   $[\text{M}+\text{H}]^+$  469.2122, found 469.2122.

### methyl(4*R*,6*R*)-7-benzyl-6-hydroxy-4-(4-methoxyphenyl)-3-phenyl-4,5,6,7-tetrahydroisoxazolo[5,4-*b*]pyridine-6-carboxylate (3f)

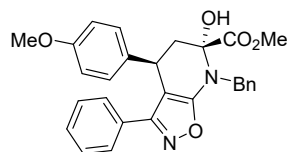

The title compound was prepared according to the general working procedure and purified by column chromatography (ethyl acetate/petroleum ether) to give the product as white solid (42.3 mg, 90% yield).  $[\alpha]_{\text{D}}^{20}$  -29.6 ( $c = 1.0$ ,  $\text{CHCl}_3$ , 91% *ee*); MP: 65-67°C; HPLC: Daicel Chiralpak AD-H, hexane: 2-propanol = 80:20, flow rate = 1.0 mL/min,  $T = 30^\circ\text{C}$ , UV = 254 nm,  $t_{\text{R}} = 12.2$  min (major),  $t_{\text{R}} = 19.8$  min (minor);  $^1\text{H}$  NMR (500 MHz, Acetone- $d_6$ )  $\delta$  7.51 – 7.46 (m, 2H), 7.45 – 7.38 (m, 2H), 7.35 (t,  $J = 7.6$  Hz, 2H), 7.30 – 7.25 (m, 1H), 7.24 – 7.13 (m, 3H), 7.11 – 7.05 (m, 2H), 6.74 – 6.70 (m, 1.67H, major), 6.69 – 6.66 (m, 0.33H, minor), 6.10 (s, 1H), 4.74 – 4.58 (m, 2H), 4.44 – 4.33 (m, 1H), 3.69 (s, 0.5H, minor), 3.67 (s, 2.5H, major), 3.65 (s, 0.5H, minor), 3.28 (s, 2.5H, major), 2.75 (dd,  $J = 13.6, 6.1$  Hz, 0.17H, minor), 2.61 – 2.45 (m, 1.66H, major), 2.34 (dd,  $J = 13.6, 9.1$  Hz, 0.17H, minor).  $^{13}\text{C}$  NMR (125 MHz, Acetone- $d_6$ )  $\delta$  170.7, 167.2, 160.8, 158.4, 138.8, 134.2, 130.0, 128.9, 128.8, 128.2, 128.0, 127.6, 127.6, 127.0, 113.5, 89.1, 85.9, 54.6, 52.0, 48.2, 44.3, 33.5. HRMS (ESI)  $m/z$  calcd for  $\text{C}_{28}\text{H}_{26}\text{N}_2\text{O}_5$   $[\text{M}+\text{H}]^+$  471.1914, found 493.1920.

### methyl(4*R*,6*R*)-7-benzyl-6-hydroxy-3-phenyl-4-(*p*-tolyl)-4,5,6,7-tetrahydroisoxazolo[5,4-*b*]pyridine-6-carboxylate (3g)

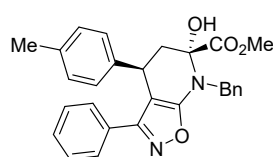

The title compound was prepared according to the general working procedure and purified by column chromatography (ethyl acetate/petroleum ether) to give the product as pale yellow solid (41.3 mg, 91% yield).  $[\alpha]_{\text{D}}^{20}$  -36.3 ( $c = 1.0$ ,  $\text{CHCl}_3$ , 95% *ee*); MP: 88-90°C; HPLC: Daicel Chiralpak IC, hexane: 2-propanol = 80:20, flow rate = 1.0 mL/min,  $T = 30^\circ\text{C}$ , UV = 254 nm,  $t_{\text{R}} = 9.5$  min (minor),  $t_{\text{R}} = 16.0$  min (major);  $^1\text{H}$  NMR (500 MHz, Acetone- $d_6$ )  $\delta$  7.49 – 7.40 (m, 4H), 7.35 (t,  $J = 7.6$  Hz, 2H), 7.26 (t,  $J = 7.3$  Hz, 1H), 7.23 – 7.13 (m, 3H), 7.04 (d,  $J = 8.1$  Hz, 2H), 6.99 – 6.92 (m, 2H), 6.15 (s, 0.9H, major), 6.03 (s, 0.1H, minor), 4.71 – 4.59 (m, 2H), 4.45 – 4.38 (m, 1H), 3.69 (s, 0.3H, minor), 3.25 (s, 2.7H, major), 2.76 (dd,  $J = 13.6, 6.2$  Hz, 0.1H, minor), 2.60 – 2.48 (m, 1.8H, major), 2.35 (dd,  $J = 13.6, 9.1$  Hz, 0.1H, minor), 2.18 (s, 2.7H, major), 2.16 (s, 0.3H, minor).  $^{13}\text{C}$  NMR (125 MHz, Acetone- $d_6$ )  $\delta$  170.7, 167.3, 160.7, 139.4, 138.8, 135.7, 130.0, 128.9,

128.8, 128.2, 128.0, 127.8, 127.6, 127.5, 127.0, 88.9, 85.9, 52.0, 48.3, 44.2, 33.9, 20.1. HRMS (ESI)  $m/z$  calcd for  $C_{28}H_{26}N_2O_4$   $[M+H]^+$  455.1965, found 455.1979.

**methyl(4*R*,6*R*)-7-benzyl-4-(4-fluorophenyl)-6-hydroxy-3-phenyl-4,5,6,7-tetrahydroisoxazolo[5,4-b]pyridine-6-carboxylate (3h)**

The title compound was prepared according to the general working procedure and purified by column chromatography (ethyl acetate/petroleum ether) to give the product as white solid (44.0 mg, 96% yield).  $[\alpha]_D^{20}$  -35.6 ( $c = 1.0$ ,  $CHCl_3$ , 96% *ee*); MP: 55-57°C; HPLC: Daicel Chiralpak IC, hexane: 2-propanol = 80:20, flow rate = 1.0 mL/min,  $T = 30^\circ C$ , UV = 254 nm,  $t_R = 7.8$  min (minor),  $t_R = 12.6$  min (major);  $^1H$  NMR (500 MHz, Acetone- $d_6$ )  $\delta$  7.50 – 7.45 (m, 2H), 7.41 – 7.34 (m, 4H), 7.30 – 7.25 (m, 1H), 7.23 – 7.14 (m, 5H), 6.93 – 6.84 (m, 2H), 6.20 (s, 0.8H, major), 6.10 (s, 0.1H, minor), 4.75 – 4.59 (m, 2H), 4.51 – 4.43 (m, 1H), 3.69 (s, 0.33H, minor), 3.31 (s, 1.67H, major), 2.77 (dd,  $J = 13.7, 6.1$  Hz, 0.11H, minor), 2.55 – 2.48 (m, 1.78H, major), 2.36 (dd,  $J = 13.7, 9.0$  Hz, 0.11H, minor).  $^{13}C$  NMR (125 MHz, Acetone- $d_6$ )  $\delta$  170.7, 167.2, 161.4 (d,  $J = 243.3$  Hz), 160.8, 138.6, 138.4 (d,  $J = 3.5$  Hz), 129.8, 129.8 (d,  $J = 8.4$  Hz), 128.9, 128.2, 128.0, 127.6, 127.6, 127.1, 114.8 (d,  $J = 21.2$  Hz), 89.0, 85.9, 52.1, 48.3, 44.1, 33.6.  $^{19}F$  NMR (471 MHz, Acetone- $d_6$ )  $\delta$  -117.9. HRMS (ESI)  $m/z$  calcd for  $C_{27}H_{23}FN_2O_4$   $[M+H]^+$  459.1715, found 459.1718.

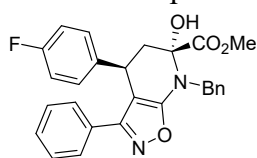

**methyl(4*R*,6*R*)-7-benzyl-4-(4-chlorophenyl)-6-hydroxy-3-phenyl-4,5,6,7-tetrahydroisoxazolo[5,4-b]pyridine-6-carboxylate (3i)**

The title compound was prepared according to the general working procedure and purified by column chromatography (ethyl acetate/petroleum ether) to give the product as white solid (45.0 mg, 95% yield).  $[\alpha]_D^{20}$  -38.9 ( $c = 1.0$ ,  $CHCl_3$ , 90% *ee*); MP: 146-148°C; HPLC: Daicel Chiralpak IC, hexane: 2-propanol = 80:20, flow rate = 1.0 mL/min,  $T = 30^\circ C$ , UV = 254 nm,  $t_R = 8.0$  min (minor),  $t_R = 12.2$  min (major);  $^1H$  NMR (500 MHz, Acetone- $d_6$ )  $\delta$  7.47 (d,  $J = 7.5$  Hz, 2H), 7.43 – 7.39 (m, 2H), 7.36 (t,  $J = 7.6$  Hz, 2H), 7.27 (t,  $J = 7.3$  Hz, 1H), 7.24 – 7.21 (m, 1H), 7.20 – 7.11 (m, 6H), 6.23 (s, 1H), 4.70 (d,  $J = 16.3$  Hz, 1H), 4.61 (d,  $J = 16.3$  Hz, 1H), 4.49 (t,  $J = 7.1$  Hz, 1H), 3.30 (s, 3H), 2.52 (d,  $J = 7.1$  Hz, 2H).  $^{13}C$  NMR (125 MHz, Acetone- $d_6$ )  $\delta$  170.6, 167.3, 160.7, 141.4, 138.5, 131.6, 129.8, 129.7, 129.0, 128.2, 128.1, 128.1, 127.6, 127.6, 127.1, 88.6, 85.8, 52.1, 48.2, 43.9, 33.7. HRMS (ESI)  $m/z$  calcd for  $C_{27}H_{23}ClN_2O_4$   $[M+Na]^+$  497.1239, found 497.1241.

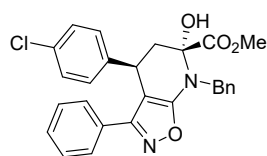

**methyl(4*R*,6*R*)-7-benzyl-4-(4-bromophenyl)-6-hydroxy-3-phenyl-4,5,6,7-tetrahydroisoxazolo[5,4-b]pyridine-6-carboxylate (3j)**

The title compound was prepared according to the general working procedure and purified by column chromatography (ethyl acetate/petroleum ether) to give the product as white solid (49.3 mg, 95% yield).  $[\alpha]_D^{20}$  -49.3 ( $c = 1.0$ ,  $CHCl_3$ , 97% *ee*); MP: 73-75°C; HPLC: Daicel Chiralpak IC, hexane: 2-propanol = 80:20, flow rate

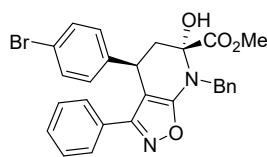

= 1.0 mL/min, T = 30°C, UV = 254 nm,  $t_R$  = 8.0 min (minor),  $t_R$  = 12.4 min (major);  $^1\text{H}$  NMR (500 MHz, Acetone- $d_6$ )  $\delta$  7.47 (d,  $J$  = 7.4 Hz, 2H), 7.43 – 7.39 (m, 2H), 7.38 – 7.30 (m, 4H), 7.29 – 7.21 (m, 2H), 7.21 – 7.16 (m, 2H), 7.13 (d,  $J$  = 8.3 Hz, 2H), 6.23 (s, 1H), 4.70 (d,  $J$  = 16.3 Hz, 1H), 4.61 (d,  $J$  = 16.3 Hz, 1H), 4.48 (t,  $J$  = 7.0 Hz, 1H), 3.30 (s, 3H), 2.52 (d,  $J$  = 7.1 Hz, 2H).  $^{13}\text{C}$  NMR (125 MHz, Acetone- $d_6$ )  $\delta$  170.6, 167.3, 160.7, 141.9, 138.5, 131.1, 130.1, 129.8, 129.0, 128.2, 128.1, 127.6, 127.5, 127.1, 119.7, 88.5, 85.8, 52.1, 48.2, 43.8, 33.8. HRMS (ESI)  $m/z$  calcd for  $\text{C}_{27}\text{H}_{23}\text{BrN}_2\text{O}_4$   $[\text{M}+\text{H}]^+$  519.0914, found 519.0912.

**methyl(4*R*,6*R*)-7-benzyl-6-hydroxy-3-phenyl-4-(4-(trifluoromethyl)phenyl)-4,5,6,7-tetrahydroisoxazolo[5,4-b]pyridine-6-carboxylate (3k)**

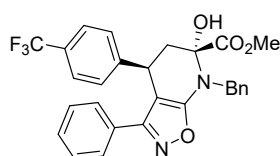

The title compound was prepared according to the general working procedure and purified by column chromatography (ethyl acetate/petroleum ether) to give the product as amorphous solid.

(48.3 mg, 95% yield).  $[\alpha]_D^{20}$  -23.9 ( $c$  = 0.5,  $\text{CHCl}_3$ , 97% *ee*);

HPLC: Daicel Chiralpak AD-H, hexane: 2-propanol = 80:20, flow rate = 1.0 mL/min, T = 30°C, UV = 254 nm,  $t_R$  = 7.7 min (major),  $t_R$  = 12.4 min (minor);  $^1\text{H}$  NMR (500 MHz, Acetone- $d_6$ )  $\delta$  7.51 – 7.46 (m, 4H), 7.42 – 7.34 (m, 6H), 7.28 (t,  $J$  = 7.4 Hz, 1H), 7.23 – 7.13 (m, 3H), 6.25 (s, 0.83H, major), 6.08 (s, 0.17H, minor), 4.73 – 4.57 (m, 3H), 3.67 (s, 0.5H, minor), 3.29 (s, 2.5H, major), 2.83 (dd,  $J$  = 13.7, 6.2 Hz, 0.17H, minor), 2.58 – 2.53 (m, 1.66H, major), 2.41 (dd,  $J$  = 13.7, 8.3 Hz, 0.17H, minor).  $^{13}\text{C}$  NMR (125 MHz, Acetone- $d_6$ )  $\delta$  170.6, 167.3, 160.8, 147.2, 138.5, 129.7, 128.9, 128.8, 128.2, 128.1 (q,  $J$  = 31.4 Hz), 128.1, 127.6, 127.5, 127.1, 125.0 (q,  $J$  = 4.0 Hz), 124.4 (q,  $J$  = 271.2 Hz), 88.4, 85.8, 52.0, 48.3, 43.7, 34.2.  $^{19}\text{F}$  NMR (470 MHz, Acetone- $d_6$ )  $\delta$  -62.9. HRMS (ESI)  $m/z$  calcd for  $\text{C}_{28}\text{H}_{23}\text{F}_3\text{N}_2\text{O}_4$   $[\text{M}+\text{H}]^+$  509.1683, found 509.1693.

**methyl(4*R*,6*R*)-7-benzyl-4-(3-chlorophenyl)-6-hydroxy-3-phenyl-4,5,6,7-tetrahydroisoxazolo[5,4-b]pyridine-6-carboxylate (3l)**

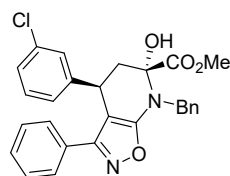

The title compound was prepared according to the general working procedure and purified by column chromatography (ethyl acetate/petroleum ether) to give the product as colorless oil. (44.2 mg, 93% yield).  $[\alpha]_D^{20}$  -33.1 ( $c$  = 1.0,  $\text{CHCl}_3$ , 95% *ee*); HPLC:

Daicel Chiralpak IC, hexane: 2-propanol = 80:20, flow rate = 1.0 mL/min, T = 30°C, UV = 254 nm,  $t_R$  = 9.4 min (major),  $t_R$  = 13.8 min (minor);  $^1\text{H}$  NMR (500 MHz, Acetone- $d_6$ )  $\delta$  7.50 – 7.44 (m, 2H), 7.44 – 7.33 (m, 4H), 7.27 (td,  $J$  = 7.2, 1.5 Hz, 1H), 7.25 – 7.05 (m, 7H), 6.21 (s, 0.6H, major), 6.06 (s, 0.2H, minor), 4.83 – 4.58 (m, 2H), 4.54 – 4.45 (m, 1H), 3.68 (s, 0.8H, minor), 3.31 (s, 2.15H, major), 2.80 (dd,  $J$  = 13.7, 6.2 Hz, 0.27H, minor), 2.60 – 2.49 (m, 1.46H, major), 2.39 (dd,  $J$  = 13.7, 8.4 Hz, 0.27H, minor).



major  $^{13}\text{C}$  NMR (125 MHz, Acetone- $d_6$ )  $\delta$  170.6, 167.3, 160.8, 144.9, 138.5, 133.5, 129.8, 129.8, 129.0, 128.2, 128.1, 128.0, 127.6, 127.5, 127.0, 126.5, 126.5, 88.4, 85.8, 52.1, 48.2, 43.7, 34.0.

minor  $^{13}\text{C}$  NMR (125 MHz, Acetone- $d_6$ )  $\delta$  171.0, 167.3, 160.7, 145.5, 138.7, 133.4, 129.8, 129.8, 129.0, 128.2, 128.0, 127.9, 127.8, 127.5, 127.0, 126.4, 126.3, 88.5, 86.4, 52.5, 47.2, 44.5, 34.8.

HRMS (ESI)  $m/z$  calcd for  $\text{C}_{27}\text{H}_{23}\text{ClN}_2\text{O}_4$   $[\text{M}+\text{H}]^+$  475.1419, found 475.1432.

**methyl(4*R*,6*R*)-7-benzyl-4-(3-bromophenyl)-6-hydroxy-3-phenyl-4,5,6,7-tetrahydroisoxazolo[5,4-b]pyridine-6-carboxylate (3m)**

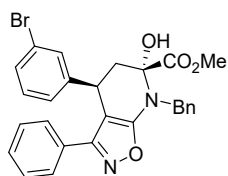

The title compound was prepared according to the general working procedure and purified by column chromatography (ethyl acetate/petroleum ether) to give the product as colorless oil (48.8 mg, 94% yield).  $[\alpha]_{\text{D}}^{20}$  -45.2 ( $c = 1.0$ ,  $\text{CHCl}_3$ , 95% *ee*); MP: 53-55°C; HPLC: Daicel Chiralpak IC, hexane: 2-propanol = 80:20, flow rate = 1.0 mL/min,  $T = 30^\circ\text{C}$ , UV = 254 nm,  $t_{\text{R}} = 7.7$  min (minor),  $t_{\text{R}} = 12.2$  min (major);  $^1\text{H}$  NMR (500 MHz, Acetone- $d_6$ )  $\delta$  7.47 (d,  $J = 7.6$  Hz, 2H), 7.43 – 7.33 (m, 5H), 7.29 – 7.15 (m, 6H), 7.12 – 7.04 (m, 1H), 6.23 (s, 0.8H, major), 6.08 (s, 0.2H, minor), 4.74 – 4.59 (m, 2H), 4.53 – 4.44 (m, 1H), 3.67 (s, 0.6H, minor), 3.30 (s, 2.4H, major), 2.80 (dd,  $J = 13.7$ , 6.2 Hz, 0.2H, minor), 2.59 – 2.52 (m, 1.6H, major), 2.39 (dd,  $J = 13.7$ , 8.4 Hz, 0.2H, minor).

major:  $^{13}\text{C}$  NMR (125 MHz, Acetone- $d_6$ )  $\delta$  170.6, 167.3, 160.8, 145.2, 138.5, 131.0, 130.1, 129.8, 129.5, 129.0, 128.2, 128.1, 127.6, 127.5, 127.1, 127.0, 121.8, 88.4, 85.8, 52.1, 48.2, 43.7, 34.0.

minor:  $^{13}\text{C}$  NMR (125 MHz, Acetone- $d_6$ )  $\delta$  171.0, 167.3, 160.7, 145.8, 138.7, 130.9, 130.1, 129.8, 129.3, 129.0, 128.1, 128.1, 127.8, 127.5, 127.1, 126.7, 121.7, 88.5, 86.5, 52.5, 47.2, 44.5, 34.8.

HRMS (ESI)  $m/z$  calcd for  $\text{C}_{27}\text{H}_{23}\text{BrN}_2\text{O}_4$   $[\text{M}+\text{H}]^+$  519.0914, found 519.0927.

**methyl(4*S*,6*R*)-7-benzyl-4-(2-chlorophenyl)-6-hydroxy-3-phenyl-4,5,6,7-tetrahydroisoxazolo[5,4-b]pyridine-6-carboxylate (3n)**

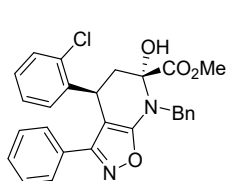

The title compound was prepared according to the general working procedure and purified by column chromatography (ethyl acetate/petroleum ether) to give the product as pale yellow oil. (43.2 mg, 91% yield).  $[\alpha]_{\text{D}}^{20}$  -45.0 ( $c = 1.0$ ,  $\text{CHCl}_3$ , 80% *ee*); HPLC: Daicel Chiralpak IC, hexane: 2-propanol = 80:20, flow rate = 1.0 mL/min,  $T = 30^\circ\text{C}$ , UV = 254 nm,  $t_{\text{R}} = 8.0$  min (minor),  $t_{\text{R}} = 10.4$  min.  $^1\text{H}$  NMR (500 MHz, Acetone- $d_6$ )  $\delta$  7.51 – 7.46 (m, 2H), 7.38 – 7.35 (m, 4H), 7.32 – 7.15 (m, 5H), 7.12 – 6.98 (m, 3H), 4.90 – 4.61 (m, 3H), 3.32 (s, 3H), 2.69 – 2.50 (m, 2H).

major  $^{13}\text{C}$  NMR (125 MHz, Acetone- $d_6$ ) 170.6, 167.5, 160.5, 139.3, 138.6, 133.0, 129.8, 129.5, 129.1, 129.0, 128.2, 128.2, 127.6, 127.2, 126.9, 88.2, 86.5, 52.1, 48.3, 41.4, 32.0.

minor  $^{13}\text{C}$  NMR (125 MHz, Acetone- $d_6$ ) 170.9, 167.5, 160.4, 139.6, 138.7, 132.9, 129.8, 129.3, 129.1, 129.0, 128.2, 128.1, 127.8, 127.2, 127.1, 88.2, 86.0, 52.5, 47.2,

41.9, 31.2.

HRMS (ESI)  $m/z$  calcd for  $C_{27}H_{23}ClN_2O_4$   $[M+H]^+$  475.1419, found 475.1427.

**methyl(4*S*,6*R*)-7-benzyl-4-(furan-2-yl)-6-hydroxy-3-phenyl-4,5,6,7-tetrahydroisoxazolo[5,4-*b*]pyridine-6-carboxylate (3o)**

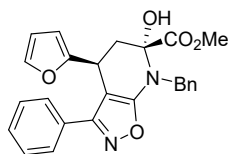

The title compound was prepared according to the general working procedure and purified by column chromatography (ethyl acetate/petroleum ether) to give the product as pale yellow oil. (40.9 mg, 95% yield).  $[\alpha]_D^{20} +9.6$  ( $c = 1.0$ ,  $CHCl_3$ , 95% *ee*); HPLC: Daicel Chiralpak IC, hexane: 2-propanol = 80:20, flow rate = 1.0 mL/min,  $T = 30^\circ C$ , UV = 254 nm,  $t_R = 8.0$  min (minor),  $t_R = 11.6$  min (major);  $^1H$  NMR (500 MHz, Acetone- $d_6$ )  $\delta$  7.53 – 7.49 (m, 2H), 7.48 – 7.45 (m, 2H), 7.36 – 7.25 (m, 7H), 6.19 – 6.14 (m, 1H), 5.84 – 5.79 (m, 1H), 4.74 – 4.61 (m, 2H), 4.46 (t,  $J = 5.8$  Hz, 1H), 3.37 (s, 3H), 2.85 (dd,  $J = 13.5, 5.9$  Hz, 1H), 2.52 (dd,  $J = 13.4, 5.9$  Hz, 1H).  $^{13}C$  NMR (125 MHz, Acetone- $d_6$ )  $\delta$  170.4, 167.0, 160.6, 154.7, 141.7, 138.9, 130.0, 129.1, 128.2, 128.2, 127.6, 127.3, 127.0, 110.0, 107.7, 86.8, 85.6, 52.3, 47.8, 39.9, 28.2. HRMS (ESI)  $m/z$  calcd for  $C_{25}H_{22}N_2O_5$   $[M+H]^+$  431.1601, found 431.1605.

**methyl(4*S*,6*R*)-7-benzyl-6-hydroxy-3-phenyl-4-(thiophen-2-yl)-4,5,6,7-tetrahydroisoxazolo[5,4-*b*]pyridine-6-carboxylate (3p)**

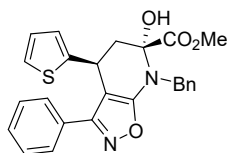

The title compound was prepared according to the general working procedure and purified by column chromatography (ethyl acetate/petroleum ether) to give the product as amorphous solid. (42.4 mg, 95% yield).  $[\alpha]_D^{20} -4.8$  ( $c = 1.0$ ,  $CHCl_3$ , 96% *ee*); HPLC: Daicel Chiralpak IC, hexane: 2-propanol = 80:20, flow rate = 1.0 mL/min,  $T = 30^\circ C$ , UV = 254 nm,  $t_R = 8.4$  min (minor),  $t_R = 13.1$  min (major);  $^1H$  NMR (500 MHz, Acetone- $d_6$ )  $\delta$  7.55 – 7.49 (m, 2H), 7.46 (d,  $J = 7.5$  Hz, 2H), 7.39 – 7.32 (m, 2H), 7.30 – 7.21 (m, 4H), 7.18 – 7.06 (m, 1H), 6.80 – 6.71 (m, 2H), 6.25 (s, 0.7H), 6.09 (s, 0.1H), 4.81 – 4.58 (m, 3H), 3.67 (s, 0.4H), 3.32 (s, 2.6H), 2.84 (dd,  $J = 13.7, 6.1$  Hz, 0.13H), 2.72 – 2.58 (m, 1.74H), 2.48 (dd,  $J = 13.7, 8.7$  Hz, 0.13H).  $^{13}C$  NMR (125 MHz, Acetone- $d_6$ )  $\delta$  170.5, 166.8, 160.6, 146.5, 138.7, 130.0, 129.0, 128.2, 128.1, 127.6, 127.4, 127.0, 126.3, 125.7, 124.2, 89.3, 85.8, 52.1, 48.1, 44.5, 29.8. HRMS (ESI)  $m/z$  calcd for  $C_{25}H_{22}N_2O_4S$   $[M+H]^+$  447.1373, found 447.1383.

**methyl(4*R*,6*R*)-7-benzyl-6-hydroxy-4-(naphthalen-2-yl)-3-phenyl-4,5,6,7-tetrahydroisoxazolo[5,4-*b*]pyridine-6-carboxylate (3q)**

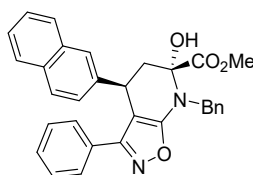

The title compound was prepared according to the general working procedure and purified by column chromatography (ethyl acetate/petroleum ether) to give the product as white solid. (45.6 mg, 93% yield).  $[\alpha]_{\text{D}}^{20}$  -44.9 ( $c = 1.0$ ,  $\text{CHCl}_3$ , 91% *ee*); MP: 78-80°C; HPLC: Daicel Chiralpak AD-H, hexane: 2-propanol = 80:20, flow rate = 1.0 mL/min,  $T = 30^\circ\text{C}$ , UV = 254 nm,  $t_{\text{R}} = 13.2$  min (major),  $t_{\text{R}} = 15.9$  min (minor);  $^1\text{H NMR}$  (500 MHz, Acetone- $d_6$ )  $\delta$  7.55 – 7.44 (m, 3H), 7.43 – 7.32 (m, 6H), 7.30 – 7.15 (m, 7H), 7.12 – 7.04 (m, 1H), 6.23 (s, 0.8H, major), 6.08 (s, 0.2H, minor), 4.73 – 4.58 (m, 2H), 4.52 – 4.44 (m, 1H), 3.67 (s, 0.6H, minor), 3.30 (s, 2.4H, major), 2.80 (dd,  $J = 13.7$ , 6.2 Hz, 0.2H, minor), 2.59 – 2.48 (m, 1.6H, major), 2.39 (dd,  $J = 13.7$ , 8.4 Hz, 0.2H, minor).  $^{13}\text{C NMR}$  (125 MHz, Acetone- $d_6$ )  $\delta$  170.6, 167.3, 160.8, 145.2, 138.5, 131.0, 130.1, 129.8, 129.5, 129.3, 129.0, 128.2, 128.1, 128.1, 127.8, 127.6, 127.5, 127.1, 127.0, 126.7, 121.8, 88.4, 85.8, 52.1, 48.2, 43.7, 34.0. HRMS (ESI)  $m/z$  calcd for  $\text{C}_{31}\text{H}_{26}\text{N}_2\text{O}_4$   $[\text{M}+\text{H}]^+$  491.1965, found 491.1971.

#### methyl(4R,6R)-7-benzyl-3-(4-fluorophenyl)-6-hydroxy-4-phenyl-4,5,6,7-tetrahydroisoxazolo[5,4-b]pyridine-6-carboxylate (3r)

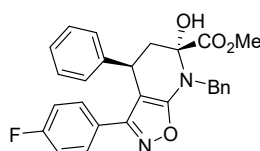

The title compound was prepared according to the general working procedure and purified by column chromatography (ethyl acetate/petroleum ether) to give the product as white solid (44.0 mg, 96% yield).  $[\alpha]_{\text{D}}^{20}$  -26.9 ( $c = 1.0$ ,  $\text{CHCl}_3$ , 75% *ee*); MP: 135-137°C; HPLC: Daicel Chiralpak AD-H, hexane: 2-propanol = 80:20, flow rate = 1.0 mL/min,  $T = 30^\circ\text{C}$ , UV = 254 nm,  $t_{\text{R}} = 8.0$  min (major),  $t_{\text{R}} = 11.4$  min (minor);  $^1\text{H NMR}$  (500 MHz, Acetone- $d_6$ )  $\delta$  7.51 – 7.45 (m, 2H), 7.45 – 7.40 (m, 2H), 7.38 – 7.33 (m, 2H), 7.30 – 7.25 (m, 1H), 7.18 – 7.04 (m, 5H), 6.95 – 6.86 (m, 2H), 6.17 (s, 1H), 4.74 – 4.57 (m, 2H), 4.49 – 4.38 (m, 1H), 3.71 (s, 0.5H, minor), 3.29 (s, 2.5H, major), 2.78 (dd,  $J = 13.6$ , 6.0 Hz, 0.17H, minor), 2.57 – 2.47 (m, 1.66H, major), 2.37 (dd,  $J = 13.6$ , 9.7 Hz, 0.17H, minor).  $^{13}\text{C NMR}$  (125 MHz, Acetone- $d_6$ )  $\delta$  170.7, 167.3, 162.9 (d,  $J = 246.6$  Hz), 160.0, 142.2, 138.5, 129.8 (d,  $J = 8.5$  Hz), 128.2, 128.2, 128.0, 127.6, 127.1, 126.5, 126.3 (d,  $J = 3.0$  Hz), 114.8 (d,  $J = 21.7$  Hz), 89.1, 85.9, 52.1, 48.3, 44.1, 34.3.  $^{19}\text{F NMR}$  (470 MHz, Acetone)  $\delta$  -113.7. HRMS (ESI)  $m/z$  calcd for  $\text{C}_{27}\text{H}_{23}\text{FN}_2\text{O}_4$   $[\text{M}+\text{H}]^+$  459.1715, found 459.1720.

#### methyl(4R,6R)-7-benzyl-3-(4-chlorophenyl)-6-hydroxy-4-phenyl-4,5,6,7-tetrahydroisoxazolo[5,4-b]pyridine-6-carboxylate (3s)

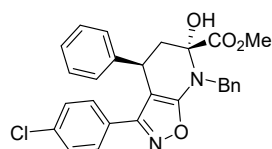

The title compound was prepared according to the general working procedure and purified by column chromatography (ethyl acetate/petroleum ether) to give the product as white solid. (45.1 mg, 95% yield).  $[\alpha]_{\text{D}}^{20}$  -24.7 ( $c = 1.0$ ,  $\text{CHCl}_3$ , 96% *ee*); MP: 126-128°C; HPLC: Daicel Chiralpak IC, hexane: 2-propanol = 80:20, flow rate = 1.0 mL/min,  $T = 30^\circ\text{C}$ , UV = 254 nm,  $t_{\text{R}} = 6.6$  min (minor),  $t_{\text{R}} = 8.4$  min (major);  $^1\text{H NMR}$  (500 MHz, Acetone- $d_6$ )  $\delta$  7.51 – 7.45 (m, 2H), 7.42 – 7.38 (m, 2H), 7.38 – 7.33 (m, 2H), 7.30 – 7.25 (m, 1H), 7.20 – 7.12 (m, 6H),

7.12 – 7.04 (m, 1H), 6.20 (s, 1H), 4.76 – 4.57 (m, 2H), 4.46 (dd,  $J = 8.3, 6.1$  Hz, 1H), 3.28 (s, 3H), 2.58 – 2.47 (m, 2H).  $^{13}\text{C}$  NMR (125 MHz, Acetone- $d_6$ )  $\delta$  170.7, 167.4, 159.8, 142.2, 138.5, 134.3, 129.2, 128.7, 128.3, 128.2, 128.1, 128.0, 127.6, 127.1, 126.6, 89.2, 85.9, 52.1, 48.3, 44.1, 34.2. HRMS (ESI)  $m/z$  calcd for  $\text{C}_{27}\text{H}_{23}\text{ClN}_2\text{O}_4$   $[\text{M}+\text{H}]^+$  475.1419, found 475.1420.

**methyl(4*R*,6*R*)-7-benzyl-3-(4-bromophenyl)-6-hydroxy-4-phenyl-4,5,6,7-tetrahydroisoxazolo[5,4-b]pyridine-6-carboxylate (3t)**

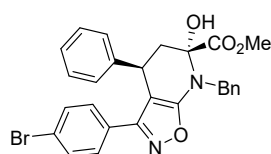

The title compound was prepared according to the general working procedure and purified by column chromatography (ethyl acetate/petroleum ether) to give the product as white solid. (49.8 mg, 96% yield).  $[\alpha]_{\text{D}}^{20}$  -19.8 ( $c = 1.0$ ,  $\text{CHCl}_3$ , 95% *ee*); MP: 123-125°C; HPLC: Daicel Chiralpak IC, hexane: 2-propanol = 80:20, flow rate = 1.0 mL/min,  $T = 30^\circ\text{C}$ , UV = 254 nm,  $t_{\text{R}} = 6.7$  min (minor),  $t_{\text{R}} = 8.4$  min (major);  $^1\text{H}$  NMR (500 MHz, Acetone- $d_6$ )  $\delta$  7.49 – 7.45 (m, 2H), 7.38 – 7.26 (m, 7H), 7.18 – 7.14 (m, 4H), 7.11 – 7.06 (m, 1H), 6.19 (s, 1H), 4.73 – 4.58 (m, 2H), 4.45 (dd,  $J = 8.3, 6.1$  Hz, 1H), 3.28 (s, 3H), 2.58 – 2.47 (m, 2H).  $^{13}\text{C}$  NMR (125 MHz, Acetone- $d_6$ )  $\delta$  170.7, 167.5, 159.9, 142.2, 138.5, 131.1, 129.5, 129.1, 128.3, 128.2, 128.0, 127.6, 127.1, 126.6, 122.6, 89.2, 85.9, 52.1, 48.3, 44.1, 34.2. HRMS (ESI)  $m/z$  calcd for  $\text{C}_{27}\text{H}_{23}\text{BrN}_2\text{O}_4$   $[\text{M}+\text{H}]^+$  519.0914, found 519.0920.

**methyl(4*R*,6*R*)-7-benzyl-3-(3-chlorophenyl)-6-hydroxy-4-phenyl-4,5,6,7-tetrahydroisoxazolo[5,4-b]pyridine-6-carboxylate (3u)**

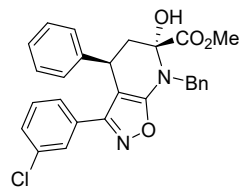

The title compound was prepared according to the general working procedure and purified by column chromatography (ethyl acetate/petroleum ether) to give the product as colorless oil. (44.2 mg, 93% yield).  $[\alpha]_{\text{D}}^{20}$  -19.9 ( $c = 1.0$ ,  $\text{CHCl}_3$ , 92% *ee*); HPLC: Daicel Chiralpak AD-H, hexane: 2-propanol = 80:20, flow rate = 1.0 mL/min,  $T = 30^\circ\text{C}$ , UV = 254 nm,  $t_{\text{R}} = 6.4$  min (major),  $t_{\text{R}} = 12.8$  min (minor);  $^1\text{H}$  NMR (500 MHz, Acetone- $d_6$ )  $\delta$  7.51 – 7.45 (m, 2H), 7.39 – 7.25 (m, 5H), 7.25 – 7.21 (m, 1H), 7.20 – 7.13 (m, 5H), 7.12 – 7.04 (m, 1H), 6.17 (s, 1H), 4.74 – 4.58 (m, 2H), 4.52 – 4.38 (m, 1H), 3.72 (s, 0.6H, minor), 3.30 (s, 2.4H, major), 2.78 (dd,  $J = 13.6, 6.0$  Hz, 0.2H, minor), 2.58 – 2.47 (m, 1.6H, major), 2.39 (dd,  $J = 13.6, 9.9$  Hz, 0.2H, minor). major:  $^{13}\text{C}$  NMR (125 MHz, Acetone- $d_6$ )  $\delta$  170.7, 167.4, 159.7, 142.1, 138.4, 133.4, 131.8, 129.7, 128.8, 128.3, 128.2, 127.9, 127.7, 127.6, 127.1, 126.6, 126.1, 89.4, 86.6, 52.1, 48.3, 44.0, 34.2. minor:  $^{13}\text{C}$  NMR (125 MHz, Acetone- $d_6$ )  $\delta$  171.0, 167.6, 159.6, 142.7, 138.8, 133.3, 131.7, 129.6, 128.7, 128.3, 128.2, 127.8, 127.6, 127.5, 127.0, 126.6, 126.1, 89.3, 85.9, 52.5, 46.9, 45.5, 35.2. HRMS (ESI)  $m/z$  calcd for  $\text{C}_{27}\text{H}_{23}\text{ClN}_2\text{O}_4$   $[\text{M}+\text{H}]^+$  475.1419, found 475.1422.

**methyl(4*R*,6*R*)-7-benzyl-3-(furan-2-yl)-6-hydroxy-4-phenyl-4,5,6,7-tetrahydroisoxazolo[5,4-b]pyridine-6-carboxylate (3v)**

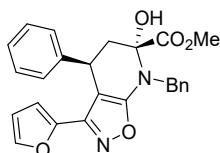

The title compound was prepared according to the general working procedure and purified by column chromatography (ethyl acetate/petroleum ether) to give the product as colorless oil. (40.5 mg, 94% yield).  $[\alpha]_{\text{D}}^{20} +4.6$  ( $c = 0.5$ ,  $\text{CHCl}_3$ , 97% *ee*); HPLC: Daicel Chiralpak AD-H, hexane: 2-propanol = 80:20, flow rate = 1.0 mL/min,  $T = 30^\circ\text{C}$ , UV = 254 nm,  $t_{\text{R}} = 12.4$  min (minor),  $t_{\text{R}} = 19.4$  min (major);  $^1\text{H}$  NMR (500 MHz, Acetone- $d_6$ )  $\delta$  7.49 – 7.44 (m, 2H), 7.42 – 7.38 (m, 1H), 7.37 – 7.32 (m, 2H), 7.28 – 7.24 (m, 3H), 7.22 – 7.15 (m, 3H), 6.33 – 6.25 (m, 1H), 6.24 – 6.07 (m, 2H), 4.74 – 4.58 (m, 2H), 4.39 – 4.27 (m, 1H), 3.66 (s, 0.35H, minor), 3.21 (s, 2.65H, major), 2.80 (dd,  $J = 13.7$ , 6.4 Hz, 0.11H, minor), 2.72 – 2.54 (m, 1.78H, major), 2.38 (dd,  $J = 13.7$ , 8.9 Hz, 0.11H, minor).  $^{13}\text{C}$  NMR (125 MHz, Acetone- $d_6$ )  $\delta$  170.5, 167.2, 153.0, 144.4, 143.5, 142.7, 138.7, 128.3, 128.2, 127.8, 127.6, 127.0, 127.0, 126.5, 111.0, 87.9, 85.9, 51.9, 48.1, 43.8, 33.8. HRMS (ESI)  $m/z$  calcd for  $\text{C}_{25}\text{H}_{22}\text{N}_2\text{O}_5$   $[\text{M}+\text{H}]^+$  431.1601, found 431.1606.

### **methyl(4R,6R)-7-benzyl-3-(tert-butyl)-6-hydroxy-4-phenyl-4,5,6,7-tetrahydroisoxazolo[5,4-b]pyridine-6-carboxylate (3w)**

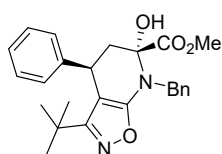

The title compound was prepared according to the general working procedure and purified by column chromatography (ethyl acetate/petroleum ether) to give the product as white solid. (40.4 mg, 96% yield).  $[\alpha]_{\text{D}}^{20} -16.9$  ( $c = 0.5$ ,  $\text{CHCl}_3$ , 98% *ee*); MP: 76–78°C; HPLC: Daicel Chiralpak AD-H, hexane: 2-propanol = 80:20, flow rate = 1.0 mL/min,  $T = 30^\circ\text{C}$ , UV = 254 nm,  $t_{\text{R}} = 4.8$  min (major),  $t_{\text{R}} = 5.5$  min (minor);  $^1\text{H}$  NMR (500 MHz, Acetone- $d_6$ )  $\delta$  7.50 – 7.41 (m, 2H), 7.38 – 7.29 (m, 4H), 7.29 – 7.17 (m, 4H), 6.05 (s, 1H), 4.69 – 4.48 (m, 2H), 4.30 – 4.24 (m, 1H), 3.55 (s, 0.5H, minor), 3.16 (s, 2.5H, major), 2.78 – 2.70 (m, 1H), 2.62 – 2.57 (m, 0.83H, major), 2.38 (dd,  $J = 13.8$ , 5.5 Hz, 0.17H, minor), 1.02 (s, 7.5H, major), 1.00 (s, 1.5H, minor).  $^{13}\text{C}$  NMR (125 MHz, Acetone- $d_6$ )  $\delta$  170.5, 168.5, 166.8, 144.1, 139.6, 128.7, 128.1, 128.1, 127.6, 126.8, 126.6, 87.3, 85.5, 51.6, 48.0, 43.8, 34.8, 32.8, 28.5. HRMS (ESI)  $m/z$  calcd for  $\text{C}_{25}\text{H}_{28}\text{N}_2\text{O}_4$   $[\text{M}+\text{H}]^+$  421.2122, found 421.2126.

## **1.5 A plausible structure of the transition state and DFT calculations.**

All the calculations were performed using Gaussian 16 software packages.<sup>[1]</sup> The geometry of all reactants and transition states were optimized using the (U)B3LYP<sup>[2]</sup>-D3(Becke-Johnson damping function)<sup>[3]</sup> in toluene (using SMD solvation model<sup>[4]</sup>). In these geometry optimizations, a mixed basis set of SDD<sup>[5]</sup> for Cu, while 6-31G(d)<sup>[6]</sup> for all the other atoms was used. Vibrational frequency analysis was calculated at the same level of theory to validate each structure as either a minimum or a transition state and to evaluate its zero-point energy and thermal corrections at 298 K. The wavefunction stability determination was done for open-shell calculations. It's found that the wavefunction is stable under the perturbations considered. For each transition state, the intrinsic reaction coordinate (IRC) analysis was conducted to ensure that it connects the right reactant and product.<sup>[7]</sup> To obtain more accurate energies, solution-

phase single point energy calculations were performed at the (U)B3LYP-D3(BJ)/6-311+G(d,p)-SDD level.

**Table 1. Thermal correction of Gibbs free energy (TCG, hartree) and single point energies (SP, hartree) in toluene for all species involved in this study**

| Compounds      | TCG      | SP           | Compounds                     | TCG      | SP           |
|----------------|----------|--------------|-------------------------------|----------|--------------|
| <b>Int-I</b>   | 0.364875 | -1668.583003 | <b>Int-IV</b>                 | 0.396274 | -1454.227987 |
| <b>1a</b>      | 0.14554  | -651.087685  | <b>Int-V</b>                  | 0.438813 | -1531.120973 |
| <b>2c</b>      | 0.221059 | -803.112483  | <b>Int-VI</b>                 | 0.436012 | -1531.115342 |
| <b>Int-II</b>  | 0.783441 | -3122.860782 | <i>(R,R)</i> - <b>3c</b>      | 0.39871  | -1454.236033 |
| <b>TS</b>      | 0.78712  | -3122.831592 | <i>(R,S)</i> - <b>3c</b>      | 0.398003 | -1454.236391 |
| <b>Int-III</b> | 0.786949 | -3122.835627 | H <sub>3</sub> O <sup>+</sup> | 0.01485  | -76.803372   |

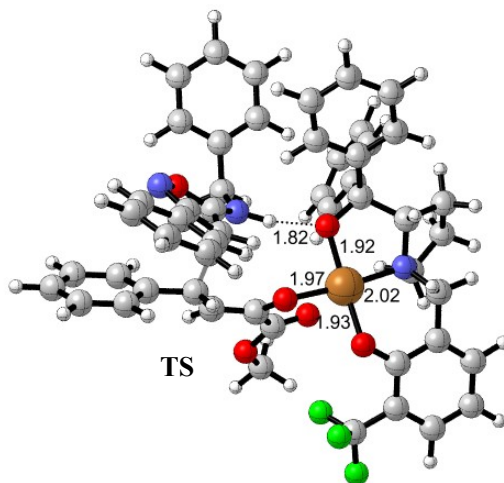

**Scheme 1.** 3D structures were generated by CYLview,<sup>[8]</sup> key bond distances shown in units of Å.

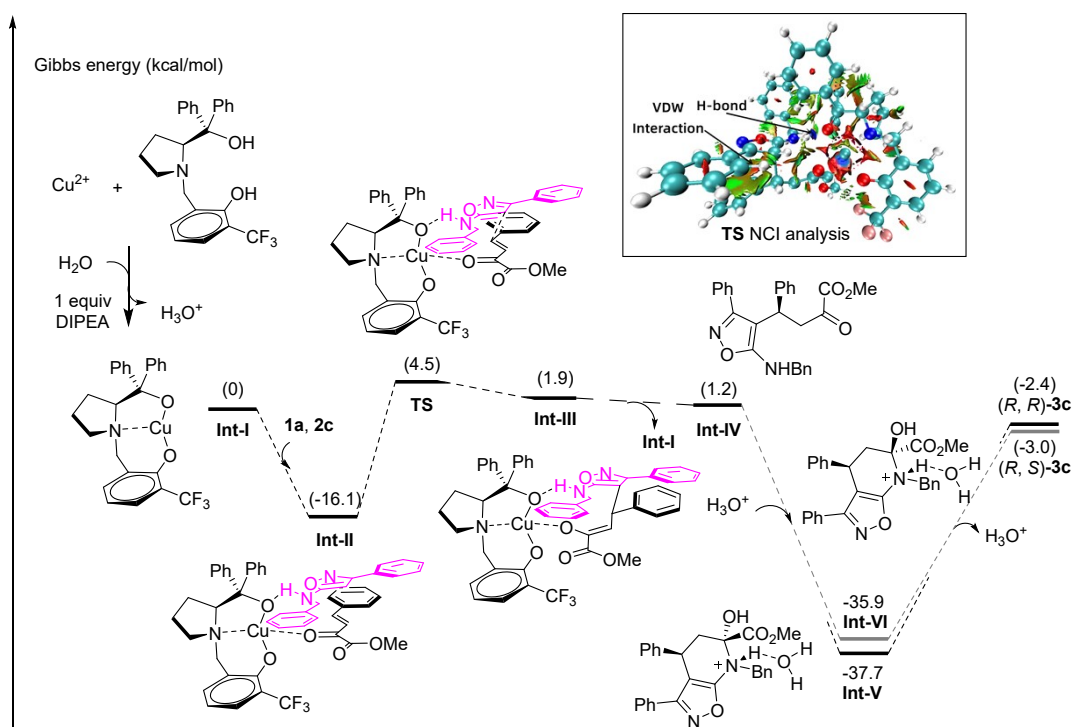

**Scheme 2.** (a) Gibbs energy profiles for the Cu-catalyzed Michael/*N*-hemiacetalization cascade reaction of **1a** with **2c**. Free energies in solution (in kcal/mol) at the (U)B3LYP-D3(BJ)/6-311+G(d,p)-SDD/SMD(Toluene)//(U)B3LYP-D3(BJ)/6-31G(d)-SDD/SMD(Toluene) level are displayed. [b] The NCI analysis was obtained by VMD software.<sup>[9]</sup>

Cartesian coordinates:

**1a**

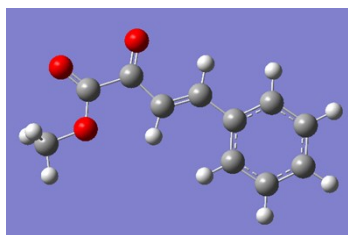

|   |             |             |             |
|---|-------------|-------------|-------------|
| C | 3.52279500  | 1.62414100  | 0.00057000  |
| C | 2.22671400  | 1.12376200  | 0.00038800  |
| C | 1.99592100  | -0.26647000 | -0.00006800 |
| C | 3.10682900  | -1.13066900 | -0.00033600 |
| C | 4.40505700  | -0.62805900 | -0.00014800 |
| C | 4.61646900  | 0.75128900  | 0.00030700  |
| H | 3.68596200  | 2.69798900  | 0.00091700  |
| H | 1.38794900  | 1.81258900  | 0.00059800  |
| H | 2.93829600  | -2.20428500 | -0.00070000 |
| H | 5.24993300  | -1.31051000 | -0.00035100 |
| H | 5.62778600  | 1.14767200  | 0.00045200  |
| C | 0.66333400  | -0.85330000 | -0.00028200 |
| H | 0.62701400  | -1.94181800 | -0.00067300 |
| C | -0.52456700 | -0.20847000 | -0.00004300 |
| H | -0.59767800 | 0.87180100  | 0.00034500  |
| C | -1.77384000 | -0.97750400 | -0.00025000 |
| O | -1.84155900 | -2.19722000 | -0.00085300 |
| C | -3.11065100 | -0.19862900 | 0.00049000  |
| O | -4.19101000 | -0.73988000 | 0.00231100  |
| O | -2.92533300 | 1.13387100  | -0.00119900 |
| C | -4.12956800 | 1.92494500  | -0.00074300 |
| H | -4.72329400 | 1.71248700  | 0.89211300  |
| H | -3.79821300 | 2.96350300  | -0.00249300 |
| H | -4.72549300 | 1.71018500  | -0.89158100 |

**2c**

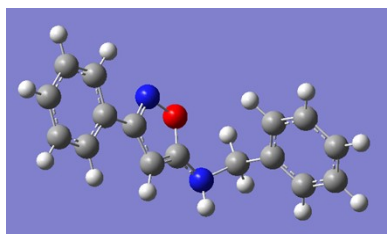

|   |             |             |             |
|---|-------------|-------------|-------------|
| C | 0.38095900  | -1.35926500 | 0.07751900  |
| C | -0.72871100 | -1.00124700 | 0.80204300  |
| C | -1.64408600 | -0.53361800 | -0.18260100 |
| H | -0.85462700 | -1.04668900 | 1.87200400  |



|   |             |             |             |
|---|-------------|-------------|-------------|
| O | 0.16553200  | -1.13108900 | -1.23377800 |
| N | -1.13836700 | -0.59498500 | -1.40285100 |
| C | -3.00580800 | -0.00989700 | 0.02217900  |
| C | -3.71124000 | 0.57320400  | -1.04299000 |
| C | -3.61798500 | -0.08673000 | 1.28082700  |
| C | -4.99817100 | 1.06557900  | -0.84906400 |
| H | -3.23850200 | 0.63625600  | -2.01737600 |
| C | -4.90664100 | 0.40913900  | 1.47250200  |
| H | -3.09010000 | -0.54243100 | 2.11270800  |
| C | -5.60097100 | 0.98679800  | 0.40917000  |
| H | -5.53235000 | 1.51501800  | -1.68150200 |
| H | -5.36826200 | 0.34127400  | 2.45358500  |
| H | -6.60518900 | 1.37341100  | 0.55852400  |
| N | 1.57294200  | -1.92998000 | 0.42471800  |
| H | 1.74334800  | -1.89447200 | 1.42374300  |
| C | 2.77852800  | -1.69817700 | -0.39102700 |
| H | 3.48992300  | -2.48815400 | -0.13498300 |
| H | 2.49510100  | -1.83732700 | -1.43620100 |
| C | 3.40135600  | -0.33545100 | -0.16827500 |
| C | 2.86029800  | 0.80724200  | -0.77412000 |
| C | 4.49624900  | -0.19185200 | 0.69110300  |
| C | 3.40304700  | 2.06571500  | -0.51901400 |
| H | 2.01257300  | 0.70777100  | -1.44569800 |
| C | 5.04255800  | 1.06706900  | 0.94598600  |
| H | 4.92698000  | -1.07379500 | 1.16051700  |
| C | 4.49481100  | 2.19927800  | 0.34216900  |
| H | 2.97587100  | 2.94320000  | -0.99657200 |
| H | 5.89541500  | 1.16213200  | 1.61257300  |
| H | 4.91837600  | 3.18055100  | 0.53738200  |

### Int-I

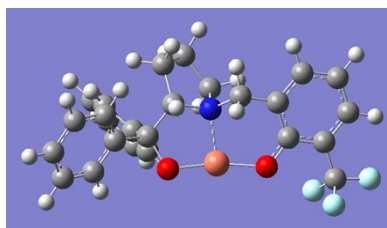

|   |             |             |            |
|---|-------------|-------------|------------|
| C | 0.16922400  | 1.15220900  | 1.52884700 |
| C | -1.34518300 | -0.65041200 | 1.09374100 |
| C | -1.77863600 | -0.04861300 | 2.44384500 |
| C | -0.88809800 | 1.20135200  | 2.65371300 |
| H | 1.18902900  | 1.33972100  | 1.86515500 |
| H | -0.06978900 | 1.86331400  | 0.74038700 |
| H | -1.34376700 | -1.74206100 | 1.11158300 |

|   |             |             |             |
|---|-------------|-------------|-------------|
| H | -2.83969900 | 0.19505300  | 2.46441200  |
| H | -1.60276400 | -0.78300100 | 3.23624600  |
| H | -1.46917000 | 2.12299000  | 2.57815300  |
| H | -0.41718700 | 1.18394900  | 3.64046400  |
| N | 0.09187200  | -0.22567000 | 0.95991100  |
| C | 1.03471200  | -1.17103000 | 1.63907200  |
| H | 0.79330300  | -1.22484100 | 2.70773700  |
| H | 0.84063600  | -2.15919800 | 1.20620700  |
| C | 2.47784100  | -0.77477300 | 1.46629400  |
| C | 3.01353400  | -0.55958000 | 0.16659500  |
| C | 3.30107600  | -0.63109200 | 2.58436400  |
| C | 4.38167500  | -0.20624100 | 0.06180300  |
| C | 4.65087100  | -0.29925600 | 2.46506200  |
| H | 2.87189800  | -0.78987200 | 3.57129900  |
| C | 5.18412200  | -0.08690700 | 1.19596800  |
| H | 5.27432400  | -0.20045800 | 3.34753700  |
| H | 6.22774000  | 0.18308600  | 1.07907700  |
| O | 2.29822200  | -0.68121300 | -0.93925400 |
| C | 4.94531900  | 0.05531100  | -1.30249800 |
| F | 4.31215700  | 1.07517900  | -1.93494200 |
| F | 4.86163400  | -1.01882600 | -2.12109000 |
| F | 6.25802500  | 0.39637100  | -1.25044300 |
| C | -2.12942800 | -0.25181800 | -0.21095000 |
| C | -2.50643100 | 1.24694500  | -0.25046600 |
| C | -1.79846300 | 2.13154900  | -1.07179700 |
| C | -3.57226500 | 1.75670700  | 0.50565600  |
| C | -2.10217400 | 3.49438300  | -1.09293400 |
| H | -1.01240200 | 1.74257300  | -1.70938100 |
| C | -3.87834100 | 3.11738000  | 0.48968200  |
| H | -4.18935500 | 1.08256400  | 1.09026800  |
| C | -3.13604100 | 3.99600400  | -0.30220200 |
| H | -1.53448500 | 4.16092800  | -1.73678400 |
| H | -4.70711300 | 3.48804200  | 1.08690300  |
| H | -3.37526800 | 5.05562700  | -0.31800200 |
| C | -3.42340800 | -1.07271200 | -0.33939700 |
| C | -4.10444400 | -0.99810600 | -1.56387900 |
| C | -3.96317400 | -1.86856900 | 0.67534100  |
| C | -5.28649400 | -1.70245800 | -1.76942800 |
| H | -3.69095500 | -0.38176900 | -2.35513800 |
| C | -5.15434300 | -2.57474500 | 0.47260400  |
| H | -3.47234200 | -1.95360300 | 1.63842400  |
| C | -5.81965600 | -2.49521500 | -0.74800700 |
| H | -5.79566000 | -1.63245500 | -2.72689100 |
| H | -5.55626500 | -3.18683400 | 1.27566000  |

|    |             |             |             |
|----|-------------|-------------|-------------|
| H  | -6.74446600 | -3.04330300 | -0.90536800 |
| O  | -1.31669700 | -0.58363200 | -1.31395800 |
| Cu | 0.46935600  | -0.49166900 | -0.98515600 |

## Int-II

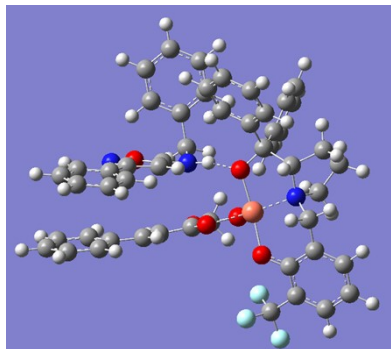

|   |            |             |             |
|---|------------|-------------|-------------|
| C | 4.42929100 | 0.94763400  | 0.31254100  |
| C | 2.76509700 | 1.60946400  | 1.89227200  |
| C | 3.94131500 | 2.58318800  | 2.08944800  |
| C | 4.91897500 | 2.27779200  | 0.92957500  |
| H | 5.21425100 | 0.20087200  | 0.19603700  |
| H | 3.97747100 | 1.11257100  | -0.66260300 |
| H | 2.35383200 | 1.25789200  | 2.84028900  |
| H | 3.61954200 | 3.62482600  | 2.09081200  |
| H | 4.41652200 | 2.39100700  | 3.05678200  |
| H | 4.89687000 | 3.06946900  | 0.17690700  |
| H | 5.94699100 | 2.19492400  | 1.29352100  |
| N | 3.38517900 | 0.41127100  | 1.23793000  |
| C | 3.99537700 | -0.49979500 | 2.26556300  |
| H | 4.71907900 | 0.05699500  | 2.87391400  |
| H | 3.17442100 | -0.80949000 | 2.92219100  |
| C | 4.66655800 | -1.68782800 | 1.63748000  |
| C | 3.90294600 | -2.52807500 | 0.77955700  |
| C | 6.01254700 | -1.96512700 | 1.86883300  |
| C | 4.56910100 | -3.62324100 | 0.16686100  |
| C | 6.64493900 | -3.06474600 | 1.28259000  |
| H | 6.57799600 | -1.30528400 | 2.52424500  |
| C | 5.91430900 | -3.88608300 | 0.42596600  |
| H | 7.69224300 | -3.26913400 | 1.48032200  |
| H | 6.39068300 | -4.73345500 | -0.05552100 |
| O | 2.62841000 | -2.33280900 | 0.55199100  |
| C | 3.78884200 | -4.47694700 | -0.78240000 |
| F | 3.28495100 | -3.76932700 | -1.82812700 |
| F | 2.73497100 | -5.09730000 | -0.19961400 |
| F | 4.55360300 | -5.46004700 | -1.32799200 |
| C | 1.53707100 | 2.12740800  | 1.05825400  |

|    |             |             |             |
|----|-------------|-------------|-------------|
| C  | 1.96249400  | 3.04791700  | -0.10968800 |
| C  | 2.16429600  | 4.42410000  | 0.06473600  |
| C  | 2.13017700  | 2.51455800  | -1.39362900 |
| C  | 2.55236200  | 5.23578700  | -1.00313500 |
| H  | 1.99254000  | 4.87372600  | 1.03709000  |
| C  | 2.52637200  | 3.32057900  | -2.46247300 |
| H  | 1.93915100  | 1.46204300  | -1.55779100 |
| C  | 2.74166500  | 4.68644100  | -2.27260300 |
| H  | 2.69651000  | 6.30081900  | -0.84244400 |
| H  | 2.65320800  | 2.87988500  | -3.44815900 |
| H  | 3.03836000  | 5.31781900  | -3.10532500 |
| C  | 0.57710500  | 2.91633900  | 1.97282400  |
| C  | -0.69934500 | 3.20847700  | 1.46909400  |
| C  | 0.89763900  | 3.37295100  | 3.25595000  |
| C  | -1.62984000 | 3.91725900  | 2.22241600  |
| H  | -0.96650700 | 2.88118300  | 0.47373700  |
| C  | -0.03430800 | 4.08774400  | 4.01745800  |
| H  | 1.87573300  | 3.18611400  | 3.68530100  |
| C  | -1.30116200 | 4.36079700  | 3.50670100  |
| H  | -2.61010900 | 4.12365400  | 1.80181000  |
| H  | 0.23904100  | 4.42883900  | 5.01260700  |
| H  | -2.02458900 | 4.91413300  | 4.09918000  |
| O  | 0.84455600  | 1.01116100  | 0.56558900  |
| C  | -5.85936000 | -3.71275500 | -1.66631700 |
| C  | -4.55575600 | -3.23439300 | -1.66363100 |
| C  | -3.77518600 | -3.30237200 | -0.49203500 |
| C  | -4.34790000 | -3.84653000 | 0.67422000  |
| C  | -5.65208400 | -4.32952400 | 0.66798100  |
| C  | -6.40948000 | -4.26431600 | -0.50308800 |
| H  | -6.45634300 | -3.64767600 | -2.57107900 |
| H  | -4.14542000 | -2.78098300 | -2.55956700 |
| H  | -3.76083700 | -3.87470400 | 1.58712600  |
| H  | -6.08199300 | -4.73861100 | 1.57675100  |
| H  | -7.43203200 | -4.63095400 | -0.50958600 |
| C  | -2.42485400 | -2.78574800 | -0.41768200 |
| H  | -1.99248500 | -2.73937400 | 0.57861500  |
| C  | -1.64002200 | -2.34955300 | -1.43973800 |
| H  | -1.95379700 | -2.37972600 | -2.47465100 |
| C  | -0.36903700 | -1.74963900 | -1.12934500 |
| O  | 0.05268200  | -1.61206700 | 0.03195000  |
| C  | 0.53084600  | -1.23392200 | -2.24944600 |
| O  | 1.61518800  | -0.72316300 | -2.02580100 |
| O  | 0.02490000  | -1.41877200 | -3.46554400 |
| Cu | 1.81804700  | -0.61435200 | 0.44197400  |

|   |             |             |             |
|---|-------------|-------------|-------------|
| C | -2.34249200 | 0.60599700  | -0.71143200 |
| C | -2.62640100 | 0.26930900  | 0.59127800  |
| C | -4.00461000 | -0.08579900 | 0.55615700  |
| H | -1.94192000 | 0.29936300  | 1.42213600  |
| O | -3.45099000 | 0.47574000  | -1.47107700 |
| N | -4.52221300 | 0.03553800  | -0.65570000 |
| C | -4.83557700 | -0.60424300 | 1.65407600  |
| C | -6.20436600 | -0.84513100 | 1.45663800  |
| C | -4.26021300 | -0.91869200 | 2.89330900  |
| C | -6.97620700 | -1.39316400 | 2.47624100  |
| H | -6.64578700 | -0.61548400 | 0.49302800  |
| C | -5.03632000 | -1.46810500 | 3.91358600  |
| H | -3.20162900 | -0.74336500 | 3.05775000  |
| C | -6.39583400 | -1.70860400 | 3.70844900  |
| H | -8.03343400 | -1.57942900 | 2.30890400  |
| H | -4.57668600 | -1.70921500 | 4.86800400  |
| H | -6.99995500 | -2.13793700 | 4.50290500  |
| N | -1.18025200 | 0.91927900  | -1.34090100 |
| H | -0.39420100 | 1.09534100  | -0.68645500 |
| C | -1.20199600 | 1.68004100  | -2.60015500 |
| H | -0.16070800 | 1.75676900  | -2.91987500 |
| H | -1.74136200 | 1.09137000  | -3.34806400 |
| C | -1.81671900 | 3.06141000  | -2.46913400 |
| C | -3.15416000 | 3.28503500  | -2.81667400 |
| C | -1.06519700 | 4.12275400  | -1.94836800 |
| C | -3.73272200 | 4.54272400  | -2.63805900 |
| H | -3.74686200 | 2.46677800  | -3.21363000 |
| C | -1.64249700 | 5.37873100  | -1.76539400 |
| H | -0.02811500 | 3.96474300  | -1.67978600 |
| C | -2.97935300 | 5.59204700  | -2.10840700 |
| H | -4.77313600 | 4.70056000  | -2.90895800 |
| H | -1.04433700 | 6.18749900  | -1.35497900 |
| H | -3.43099400 | 6.57003100  | -1.96550000 |
| C | 0.84522600  | -0.96730200 | -4.56450000 |
| H | 1.79071100  | -1.51462200 | -4.57479700 |
| H | 0.26675000  | -1.17996500 | -5.46286800 |
| H | 1.03998200  | 0.10404100  | -4.47649100 |

**TS**

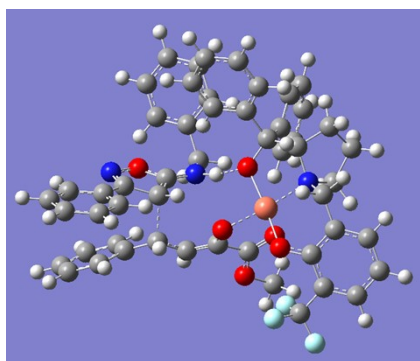

|   |            |             |             |
|---|------------|-------------|-------------|
| C | 4.11840900 | 1.44265500  | -0.15660100 |
| C | 2.62094700 | 2.09654800  | 1.56569200  |
| C | 3.66762500 | 3.22677100  | 1.47450300  |
| C | 4.52406000 | 2.88220700  | 0.23179700  |
| H | 4.96178500 | 0.77932300  | -0.34566300 |
| H | 3.48502800 | 1.43619700  | -1.03970100 |
| H | 2.37980000 | 1.84090200  | 2.59933200  |
| H | 3.21608600 | 4.21470100  | 1.39485800  |
| H | 4.28126200 | 3.22568900  | 2.38109900  |
| H | 4.31790700 | 3.56759000  | -0.59399800 |
| H | 5.59179600 | 2.94975700  | 0.45964800  |
| N | 3.32738700 | 0.91002800  | 0.99168500  |
| C | 4.22843700 | 0.27357200  | 2.01327400  |
| H | 4.93506200 | 1.01489400  | 2.40611800  |
| H | 3.57764100 | -0.04295300 | 2.83567600  |
| C | 4.97847000 | -0.89073500 | 1.43445000  |
| C | 4.22052600 | -1.96172200 | 0.88075400  |
| C | 6.36992900 | -0.92480200 | 1.40083300  |
| C | 4.93803900 | -3.02642100 | 0.26955900  |
| C | 7.06033900 | -1.99901500 | 0.83058000  |
| H | 6.92586700 | -0.09223000 | 1.82857500  |
| C | 6.33362200 | -3.04143500 | 0.25823100  |
| H | 8.14550800 | -2.01426000 | 0.81923200  |
| H | 6.85063300 | -3.87187900 | -0.21098200 |
| O | 2.91561800 | -1.98356400 | 0.92761300  |
| C | 4.15522600 | -4.12094900 | -0.38282500 |
| F | 3.33973900 | -3.66600000 | -1.37673700 |
| F | 3.35896900 | -4.79793700 | 0.47630300  |
| F | 4.96336500 | -5.04791100 | -0.96397700 |
| C | 1.23247100 | 2.33959200  | 0.84158500  |
| C | 1.38023500 | 3.24086400  | -0.40899600 |
| C | 1.40965400 | 4.64065700  | -0.33137700 |
| C | 1.45817600 | 2.64976600  | -1.67666900 |
| C | 1.53602100 | 5.42366300  | -1.48049900 |
| H | 1.30033000 | 5.12907100  | 0.63096100  |

|    |             |             |             |
|----|-------------|-------------|-------------|
| C  | 1.58687300  | 3.42884500  | -2.82806500 |
| H  | 1.41535000  | 1.56964900  | -1.75233400 |
| C  | 1.62688800  | 4.82117900  | -2.73610900 |
| H  | 1.54835900  | 6.50669300  | -1.39277300 |
| H  | 1.64986500  | 2.94462900  | -3.79936100 |
| H  | 1.71691300  | 5.42914300  | -3.63181900 |
| C  | 0.27749800  | 3.03873800  | 1.83698300  |
| C  | -1.10260900 | 2.90764500  | 1.63557800  |
| C  | 0.70815400  | 3.82843800  | 2.91176100  |
| C  | -2.02242400 | 3.54240200  | 2.46681600  |
| H  | -1.45711900 | 2.30371000  | 0.81429700  |
| C  | -0.21018100 | 4.46372600  | 3.75338300  |
| H  | 1.76530500  | 3.96252600  | 3.11206900  |
| C  | -1.57980700 | 4.32601800  | 3.53470100  |
| H  | -3.08570400 | 3.42564500  | 2.27494800  |
| H  | 0.15306200  | 5.06654000  | 4.58167700  |
| H  | -2.29344100 | 4.82111800  | 4.18745700  |
| O  | 0.68399400  | 1.10635400  | 0.46718100  |
| C  | -5.34559000 | -2.98378800 | -2.60871900 |
| C  | -4.11587100 | -2.50519200 | -2.16333300 |
| C  | -3.54984100 | -2.98543600 | -0.97243900 |
| C  | -4.24755800 | -3.95528000 | -0.23853600 |
| C  | -5.47517300 | -4.44039400 | -0.68645000 |
| C  | -6.02925300 | -3.95338900 | -1.87120100 |
| H  | -5.77301600 | -2.59783600 | -3.52981700 |
| H  | -3.59450300 | -1.74591400 | -2.73783600 |
| H  | -3.82369600 | -4.32836700 | 0.68878500  |
| H  | -5.99961300 | -5.19428200 | -0.10641500 |
| H  | -6.98877600 | -4.32592200 | -2.21871400 |
| C  | -2.24389000 | -2.47403600 | -0.47332500 |
| H  | -1.92231100 | -2.97184400 | 0.44147800  |
| C  | -1.18576800 | -2.31130600 | -1.44701800 |
| H  | -1.38476600 | -2.47178600 | -2.49777800 |
| C  | 0.05106800  | -1.87937400 | -1.03201900 |
| O  | 0.31095600  | -1.58318200 | 0.19287400  |
| C  | 1.14454200  | -1.62280400 | -2.04404200 |
| O  | 2.04352700  | -0.81415100 | -1.85422200 |
| O  | 1.03465900  | -2.34927700 | -3.15611600 |
| Cu | 1.86196400  | -0.41378200 | 0.54513400  |
| C  | -2.59416000 | 0.19631600  | -0.54098300 |
| C  | -2.51896200 | -0.82777300 | 0.46028900  |
| C  | -3.90900600 | -0.87784000 | 0.91744100  |
| H  | -1.65490000 | -0.85006000 | 1.11271700  |
| O  | -3.87013100 | 0.42748000  | -0.85451800 |

|   |             |             |             |
|---|-------------|-------------|-------------|
| N | -4.71632700 | -0.22991900 | 0.12514600  |
| C | -4.41742900 | -1.67682900 | 2.03371900  |
| C | -5.79430000 | -1.92398100 | 2.16782200  |
| C | -3.52088400 | -2.23767300 | 2.95514800  |
| C | -6.26002500 | -2.72035200 | 3.20729600  |
| H | -6.48112000 | -1.50553800 | 1.44022100  |
| C | -3.99378800 | -3.03868300 | 3.99394000  |
| H | -2.45646100 | -2.04647800 | 2.86513300  |
| C | -5.36174900 | -3.28207800 | 4.12129700  |
| H | -7.32461500 | -2.91311500 | 3.30228800  |
| H | -3.29246500 | -3.47032800 | 4.70162200  |
| H | -5.72919000 | -3.90858800 | 4.92896500  |
| N | -1.62114400 | 0.80054100  | -1.18092700 |
| H | -0.69440300 | 0.83406800  | -0.69363700 |
| C | -1.86499400 | 1.68112000  | -2.34339700 |
| H | -0.87728600 | 1.91084000  | -2.74296200 |
| H | -2.40798200 | 1.09434000  | -3.09006500 |
| C | -2.62004500 | 2.95803600  | -2.03029100 |
| C | -3.98228100 | 3.07355300  | -2.32801200 |
| C | -1.95654300 | 4.04172800  | -1.44548700 |
| C | -4.67370400 | 4.24888200  | -2.03342900 |
| H | -4.50489300 | 2.23697500  | -2.78204500 |
| C | -2.64684800 | 5.21472200  | -1.14379100 |
| H | -0.90110600 | 3.96755400  | -1.22077300 |
| C | -4.00790700 | 5.32104400  | -1.43567700 |
| H | -5.73199000 | 4.32486200  | -2.26708900 |
| H | -2.11639500 | 6.04269600  | -0.68223700 |
| H | -4.54713200 | 6.23498400  | -1.20188600 |
| C | 2.09568400  | -2.18217600 | -4.11780800 |
| H | 3.05228200  | -2.44684300 | -3.66261800 |
| H | 1.85603600  | -2.86433600 | -4.93351100 |
| H | 2.12919700  | -1.15039100 | -4.47816300 |

### Int-III

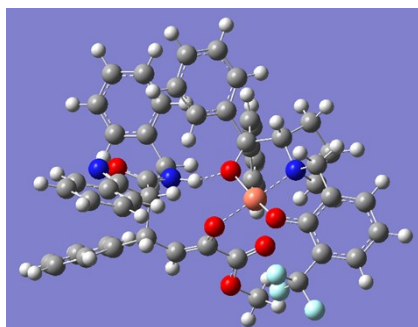

|   |            |            |             |
|---|------------|------------|-------------|
| C | 3.58093100 | 2.30418900 | -0.49822700 |
| C | 1.99597700 | 2.63594100 | 1.23963200  |



|   |             |             |             |
|---|-------------|-------------|-------------|
| C | 2.62465800  | 4.02063500  | 0.98156700  |
| C | 3.52762900  | 3.82951900  | -0.26091800 |
| H | 4.58537000  | 1.91358700  | -0.66111600 |
| H | 2.97509700  | 2.01592200  | -1.35239100 |
| H | 1.89655300  | 2.43427900  | 2.30706300  |
| H | 1.87607700  | 4.79672400  | 0.82134300  |
| H | 3.21858700  | 4.31853500  | 1.85108400  |
| H | 3.10872700  | 4.33151300  | -1.13694100 |
| H | 4.52467400  | 4.24500900  | -0.08829400 |
| N | 3.00436500  | 1.66493200  | 0.72180900  |
| C | 4.06723400  | 1.41504900  | 1.75384200  |
| H | 4.54349700  | 2.36201500  | 2.03812900  |
| H | 3.54678500  | 1.01912400  | 2.63246100  |
| C | 5.10064000  | 0.44546900  | 1.26325800  |
| C | 4.66033300  | -0.85479100 | 0.88518400  |
| C | 6.44522500  | 0.79184500  | 1.15924300  |
| C | 5.63515100  | -1.75154600 | 0.36917200  |
| C | 7.39688500  | -0.11664700 | 0.68597500  |
| H | 6.75419600  | 1.79303800  | 1.45530300  |
| C | 6.97872600  | -1.38414300 | 0.28405900  |
| H | 8.44298500  | 0.16457900  | 0.61751800  |
| H | 7.69760200  | -2.09468600 | -0.11019300 |
| O | 3.41213900  | -1.22473000 | 1.00827400  |
| C | 5.17377000  | -3.08817200 | -0.11893500 |
| F | 4.27120300  | -2.99027200 | -1.12933900 |
| F | 4.59162900  | -3.83990200 | 0.84504600  |
| F | 6.20374900  | -3.83318400 | -0.60797600 |
| C | 0.55326700  | 2.37828600  | 0.61643400  |
| C | 0.27944000  | 3.23652500  | -0.65090400 |
| C | -0.29542800 | 4.51463900  | -0.64765300 |
| C | 0.58766400  | 2.67107500  | -1.89994900 |
| C | -0.54036900 | 5.20478500  | -1.83825100 |
| H | -0.58884400 | 4.98186600  | 0.28271500  |
| C | 0.35770200  | 3.36022800  | -3.08996100 |
| H | 0.99410600  | 1.66947000  | -1.93097500 |
| C | -0.21107900 | 4.63536900  | -3.06705600 |
| H | -1.00070500 | 6.18820500  | -1.79771600 |
| H | 0.61184200  | 2.89221600  | -4.03765500 |
| H | -0.40304700 | 5.17152300  | -3.99221600 |
| C | -0.43921100 | 2.68891700  | 1.76518000  |
| C | -1.28854800 | 1.67277200  | 2.21650400  |
| C | -0.48840500 | 3.92222300  | 2.43615300  |
| C | -2.20722400 | 1.89028700  | 3.24315000  |
| H | -1.20481700 | 0.70110200  | 1.75403500  |

|    |             |             |             |
|----|-------------|-------------|-------------|
| C  | -1.40553700 | 4.14710100  | 3.46482800  |
| H  | 0.19957600  | 4.71902900  | 2.17707400  |
| C  | -2.28195400 | 3.13655700  | 3.86424500  |
| H  | -2.86530700 | 1.08296600  | 3.55325100  |
| H  | -1.42591500 | 5.11445300  | 3.95976600  |
| H  | -3.00022300 | 3.31440700  | 4.65955300  |
| O  | 0.42548000  | 1.03827900  | 0.24296400  |
| C  | -4.79935300 | -2.55816100 | -3.19166800 |
| C  | -3.59362800 | -2.18207000 | -2.60139800 |
| C  | -2.99822800 | -2.98089200 | -1.61569400 |
| C  | -3.63527600 | -4.16935600 | -1.23983000 |
| C  | -4.84079900 | -4.54999700 | -1.82978500 |
| C  | -5.42800000 | -3.74361500 | -2.80564800 |
| H  | -5.24733200 | -1.92664300 | -3.95394000 |
| H  | -3.10570000 | -1.26259100 | -2.91380000 |
| H  | -3.18300800 | -4.79815500 | -0.47830100 |
| H  | -5.31955900 | -5.47693800 | -1.52675500 |
| H  | -6.36726800 | -4.03793200 | -3.26529500 |
| C  | -1.71599200 | -2.55823800 | -0.93528200 |
| H  | -1.32362500 | -3.40328800 | -0.35847000 |
| C  | -0.67088200 | -2.04996700 | -1.86556500 |
| H  | -0.87184200 | -2.03942600 | -2.92762400 |
| C  | 0.53852100  | -1.63865900 | -1.39383300 |
| O  | 0.87623600  | -1.63694900 | -0.13405000 |
| C  | 1.54681300  | -1.06610500 | -2.35669100 |
| O  | 2.44500600  | -0.31046700 | -2.00563500 |
| O  | 1.37545200  | -1.44047500 | -3.62973400 |
| Cu | 1.99443900  | -0.08463300 | 0.37686400  |
| C  | -2.65346400 | -0.27333000 | -0.25752900 |
| C  | -2.00400100 | -1.48462400 | 0.26792900  |
| C  | -3.10953100 | -1.99657700 | 1.12919500  |
| H  | -1.01940500 | -1.31654000 | 0.71484900  |
| O  | -3.95826400 | -0.31116900 | -0.02796000 |
| N  | -4.23522200 | -1.39259200 | 0.91919200  |
| C  | -3.00397900 | -3.14027200 | 2.03403800  |
| C  | -4.15817100 | -3.75155900 | 2.55526500  |
| C  | -1.73685100 | -3.64438700 | 2.37051300  |
| C  | -4.04057800 | -4.84628100 | 3.40319900  |
| H  | -5.13412900 | -3.36661400 | 2.27927600  |
| C  | -1.62813800 | -4.74422700 | 3.22012200  |
| H  | -0.83770200 | -3.18283600 | 1.97426100  |
| C  | -2.77637600 | -5.34511400 | 3.73708900  |
| H  | -4.93418000 | -5.31770700 | 3.80130900  |
| H  | -0.64536200 | -5.12840900 | 3.47517400  |

|   |             |             |             |
|---|-------------|-------------|-------------|
| H | -2.68949300 | -6.20302900 | 4.39750100  |
| N | -2.08004600 | 0.70187700  | -0.89839100 |
| H | -1.04619400 | 0.78843600  | -0.71866000 |
| C | -2.79497600 | 1.77111700  | -1.63022000 |
| H | -2.02074300 | 2.47563900  | -1.93142100 |
| H | -3.20603300 | 1.31809800  | -2.53818600 |
| C | -3.89592700 | 2.47050300  | -0.86235500 |
| C | -5.23000700 | 2.30241400  | -1.24646200 |
| C | -3.59674900 | 3.30856500  | 0.21698300  |
| C | -6.25308100 | 2.95867600  | -0.56219200 |
| H | -5.46864800 | 1.64415200  | -2.07801900 |
| C | -4.61826300 | 3.95837500  | 0.90810200  |
| H | -2.56779900 | 3.44683300  | 0.52182500  |
| C | -5.94859200 | 3.78645300  | 0.51979000  |
| H | -7.28555500 | 2.81779600  | -0.86937200 |
| H | -4.36959100 | 4.59694100  | 1.75041600  |
| H | -6.74426000 | 4.29436200  | 1.05783500  |
| C | 2.31031700  | -0.88701700 | -4.57376500 |
| H | 3.33103000  | -1.17916600 | -4.31471100 |
| H | 2.02738000  | -1.30359600 | -5.54082700 |
| H | 2.23844500  | 0.20429600  | -4.59192700 |

#### Int-IV

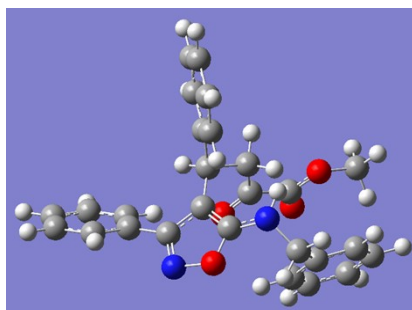

|   |            |            |             |
|---|------------|------------|-------------|
| C | 2.25432200 | 4.02418700 | -1.19681300 |
| C | 1.71400800 | 2.74412100 | -1.04775700 |
| C | 1.57619700 | 2.17142700 | 0.22018900  |
| C | 2.00497800 | 2.90745500 | 1.33438000  |
| C | 2.54639400 | 4.18270800 | 1.18961900  |
| C | 2.67050100 | 4.74890100 | -0.08140600 |
| H | 2.35473100 | 4.44926600 | -2.19184200 |
| H | 1.41397900 | 2.19102800 | -1.93099400 |
| H | 1.92000300 | 2.46900900 | 2.32655200  |
| H | 2.87895800 | 4.73103600 | 2.06689200  |
| H | 3.09489600 | 5.74197800 | -0.19935900 |
| C | 0.95537500 | 0.79239900 | 0.45430000  |
| H | 1.55582100 | 0.31226800 | 1.23131900  |

|   |             |             |             |
|---|-------------|-------------|-------------|
| C | -1.04276300 | -0.28754800 | 1.66243400  |
| O | -0.44905500 | -1.33479300 | 1.79797200  |
| C | -2.47501000 | -0.19079700 | 2.24641800  |
| O | -2.94520200 | -1.02225300 | 2.98562000  |
| O | -3.08506000 | 0.93890500  | 1.86020800  |
| C | 0.20843100  | -0.09520400 | -1.87941400 |
| C | 0.98309600  | -0.12164300 | -0.74184100 |
| C | 1.86545700  | -1.22660700 | -0.98047400 |
| O | 0.56130000  | -1.09532900 | -2.71231700 |
| N | 1.62514400  | -1.82801500 | -2.12925700 |
| C | 2.97395700  | -1.72516800 | -0.13968400 |
| C | 4.22741000  | -1.96048100 | -0.72315600 |
| C | 2.79164200  | -1.98430900 | 1.22660500  |
| C | 5.28554900  | -2.43325200 | 0.05049500  |
| H | 4.36270700  | -1.76404600 | -1.78189400 |
| C | 3.85466600  | -2.45536000 | 1.99635600  |
| H | 1.81103100  | -1.84709400 | 1.66862700  |
| C | 5.10340000  | -2.67679700 | 1.41322500  |
| H | 6.25350800  | -2.60872400 | -0.41065000 |
| H | 3.70254000  | -2.65948500 | 3.05265900  |
| H | 5.92986400  | -3.04236800 | 2.01646700  |
| N | -0.76496300 | 0.75616700  | -2.34846300 |
| H | -0.98140000 | 1.49467700  | -1.68976500 |
| C | -1.97181000 | 0.17848600  | -2.97538800 |
| H | -2.46487000 | 0.98324500  | -3.52714800 |
| H | -1.63329400 | -0.56029700 | -3.70517300 |
| C | -2.92475100 | -0.43553100 | -1.97129200 |
| C | -2.56418600 | -1.59022700 | -1.25905700 |
| C | -4.15785800 | 0.16633300  | -1.70213000 |
| C | -3.42071900 | -2.12472700 | -0.29837400 |
| H | -1.61583800 | -2.07844800 | -1.46184600 |
| C | -5.02462200 | -0.37723500 | -0.75162000 |
| H | -4.44519800 | 1.06249000  | -2.24739400 |
| C | -4.65665000 | -1.52280100 | -0.04658400 |
| H | -3.12362000 | -3.01040200 | 0.25482400  |
| H | -5.98446400 | 0.09605200  | -0.56301000 |
| H | -5.32405300 | -1.94697900 | 0.69785200  |
| C | -4.40844100 | 1.14609100  | 2.39093700  |
| H | -4.35625000 | 1.30553500  | 3.47161900  |
| H | -4.78783100 | 2.03720200  | 1.89116000  |
| H | -5.04274900 | 0.28494100  | 2.17778200  |
| C | -0.46311400 | 0.96171500  | 1.04372700  |
| H | -1.17781000 | 1.34706800  | 0.31024500  |
| H | -0.45054500 | 1.72592900  | 1.83307800  |

## Int-V

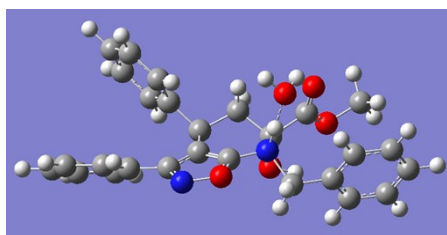

|   |             |             |             |
|---|-------------|-------------|-------------|
| C | -3.85606200 | 2.16629000  | 1.75100200  |
| C | -2.76772200 | 1.44196300  | 1.26883800  |
| C | -2.33561400 | 1.60793700  | -0.05151500 |
| C | -2.99832900 | 2.52014800  | -0.87624900 |
| C | -4.08538400 | 3.24978700  | -0.39464400 |
| C | -4.51888500 | 3.07102100  | 0.91920700  |
| H | -4.19237000 | 2.01909200  | 2.77319900  |
| H | -2.26725100 | 0.72579300  | 1.91584600  |
| H | -2.66861700 | 2.64919500  | -1.90446200 |
| H | -4.59725700 | 3.95011800  | -1.04815300 |
| H | -5.37129000 | 3.63045200  | 1.29286900  |
| C | 1.41602400  | 0.63145500  | -0.43000000 |
| C | 2.63862200  | 1.39543500  | 0.12957800  |
| O | 2.81996700  | 1.59120800  | 1.31441800  |
| O | 3.36825700  | 1.88803600  | -0.85520300 |
| C | -0.01380200 | -1.24689700 | 0.23708200  |
| C | -1.13195900 | -0.61864600 | -0.18961800 |
| C | -2.14187000 | -1.63883200 | -0.02452100 |
| O | -0.24202200 | -2.50066000 | 0.64142500  |
| N | -1.62268200 | -2.75039400 | 0.46573300  |
| C | -3.58256900 | -1.55786500 | -0.30007600 |
| C | -4.49113300 | -2.25707000 | 0.50849600  |
| C | -4.05741400 | -0.78466400 | -1.36825400 |
| C | -5.85694100 | -2.17313000 | 0.25351600  |
| H | -4.11932100 | -2.85085800 | 1.33701900  |
| C | -5.42459300 | -0.70214700 | -1.61712900 |
| H | -3.35939800 | -0.25933600 | -2.01041000 |
| C | -6.32612400 | -1.39312700 | -0.80582800 |
| H | -6.55647800 | -2.71097300 | 0.88625900  |
| H | -5.78533100 | -0.09906600 | -2.44466700 |
| H | -7.39275000 | -1.32391800 | -0.99828400 |
| C | 2.31601100  | -1.81119400 | -0.24851300 |
| H | 2.16337300  | -2.67897300 | 0.39433600  |
| H | 1.95736400  | -2.04357300 | -1.25018100 |
| C | 3.74711200  | -1.36019500 | -0.25505900 |
| C | 4.38960400  | -1.11298500 | -1.47538500 |
| C | 4.46561500  | -1.22549800 | 0.94106300  |

|   |             |             |             |
|---|-------------|-------------|-------------|
| C | 5.72774900  | -0.72148600 | -1.50229300 |
| H | 3.84741000  | -1.25036300 | -2.40829700 |
| C | 5.80117200  | -0.82901900 | 0.91338200  |
| H | 3.98113600  | -1.42821700 | 1.89204900  |
| C | 6.43327200  | -0.57605900 | -0.30699000 |
| H | 6.21978500  | -0.54218300 | -2.45328900 |
| H | 6.35114600  | -0.72771000 | 1.84386600  |
| H | 7.47652700  | -0.27565700 | -0.32522600 |
| C | 4.53233900  | 2.67268300  | -0.47233000 |
| H | 5.16102300  | 2.08737000  | 0.19785100  |
| H | 5.04704700  | 2.88895400  | -1.40654500 |
| H | 4.20095100  | 3.59183100  | 0.01432400  |
| N | 1.34322100  | -0.75390700 | 0.30787900  |
| C | 0.16612300  | 1.44716000  | -0.06894300 |
| H | 0.12045200  | 1.55175200  | 1.01910300  |
| H | 0.30330600  | 2.44558700  | -0.49279400 |
| C | -1.14918800 | 0.82783600  | -0.59222700 |
| H | -1.15561700 | 0.90241500  | -1.68513300 |
| O | 1.46150100  | 0.39921300  | -1.78431600 |
| H | 2.37980200  | 0.50163400  | -2.09426800 |
| H | 1.56271300  | -0.60697300 | 1.33970200  |
| O | 1.83702600  | -0.37298700 | 2.94603800  |
| H | 2.20992500  | 0.52503300  | 2.86223300  |
| H | 1.10579900  | -0.31717700 | 3.58332300  |

### Int-VI

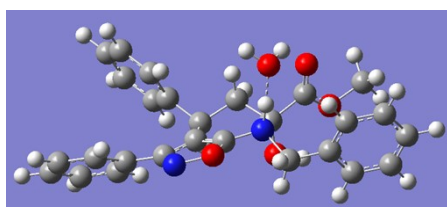

|   |             |             |             |
|---|-------------|-------------|-------------|
| C | -3.34535800 | 0.13560300  | 3.09092400  |
| C | -2.29874400 | 0.20625500  | 2.17330900  |
| C | -2.34383500 | 1.12547200  | 1.11960200  |
| C | -3.44226000 | 1.98148300  | 1.00656300  |
| C | -4.48876900 | 1.91524500  | 1.92668300  |
| C | -4.44387500 | 0.98876800  | 2.96863900  |
| H | -3.30554800 | -0.58899800 | 3.89895500  |
| H | -1.45045500 | -0.46630600 | 2.27039800  |
| H | -3.48293800 | 2.69825600  | 0.18993400  |
| H | -5.33967400 | 2.58247000  | 1.82548500  |
| H | -5.26110400 | 0.93012400  | 3.68138100  |
| C | 1.33702100  | 1.91225700  | 0.04962800  |
| C | 1.37423200  | 2.55529800  | -1.35525800 |

|   |             |             |             |
|---|-------------|-------------|-------------|
| O | 2.10172700  | 3.50619500  | -1.56187200 |
| O | 0.56316200  | 1.98077600  | -2.22129300 |
| C | 0.63287900  | -0.41291100 | -0.39868600 |
| C | -0.68215800 | -0.10885300 | -0.34073600 |
| C | -1.30303500 | -1.33391900 | -0.78859400 |
| O | 0.86198600  | -1.66074700 | -0.81720700 |
| N | -0.39623700 | -2.25188100 | -1.07443700 |
| C | -2.73129200 | -1.64973000 | -0.93071500 |
| C | -3.18267600 | -2.95972600 | -0.70713300 |
| C | -3.64889200 | -0.65569600 | -1.29706900 |
| C | -4.53424200 | -3.26346700 | -0.84148100 |
| H | -2.47130500 | -3.72629400 | -0.41823200 |
| C | -5.00025800 | -0.96444200 | -1.42748200 |
| H | -3.30780700 | 0.35408600  | -1.49408900 |
| C | -5.44579700 | -2.26690800 | -1.19764700 |
| H | -4.87791800 | -4.27755200 | -0.66113100 |
| H | -5.70458300 | -0.18750300 | -1.70861300 |
| H | -6.50100100 | -2.50498400 | -1.29415900 |
| C | 3.03044200  | 0.17631700  | -0.88361200 |
| H | 2.69966300  | -0.14971200 | -1.86871700 |
| H | 3.50823000  | 1.15186300  | -0.96723100 |
| C | 3.95127800  | -0.80363100 | -0.21142900 |
| C | 4.84569500  | -0.33804300 | 0.76454400  |
| C | 3.91836200  | -2.16707600 | -0.52161800 |
| C | 5.68101700  | -1.22877200 | 1.43671200  |
| H | 4.89286900  | 0.72521400  | 0.98662400  |
| C | 4.76004200  | -3.05627800 | 0.14720000  |
| H | 3.23311400  | -2.53371800 | -1.27810200 |
| C | 5.63463200  | -2.59154200 | 1.12989600  |
| H | 6.37777000  | -0.86013600 | 2.18365500  |
| H | 4.73072200  | -4.11289200 | -0.10010400 |
| H | 6.28828900  | -3.28653000 | 1.64824300  |
| C | 0.51587100  | 2.55781600  | -3.55800500 |
| H | 1.51242300  | 2.54559300  | -4.00163500 |
| H | -0.16809400 | 1.91905000  | -4.11388400 |
| H | 0.13894100  | 3.58074900  | -3.50052800 |
| N | 1.75806100  | 0.41499400  | -0.04152900 |
| C | -0.02512800 | 2.00496700  | 0.75383900  |
| H | 0.13263000  | 1.65121800  | 1.77786000  |
| H | -0.27439300 | 3.06780700  | 0.81892500  |
| C | -1.20193100 | 1.22244300  | 0.11955000  |
| H | -1.56367200 | 1.77571800  | -0.75391400 |
| O | 2.31529200  | 2.50860200  | 0.82617600  |
| H | 2.73421600  | 3.20135900  | 0.27061300  |

|   |            |             |            |
|---|------------|-------------|------------|
| H | 2.01803300 | 0.20181500  | 0.97321000 |
| O | 2.27030000 | 0.03617000  | 2.58687300 |
| H | 3.01276100 | -0.58409600 | 2.70211800 |
| H | 2.61698500 | 0.89805300  | 2.87755200 |

**(R, R)-3c**

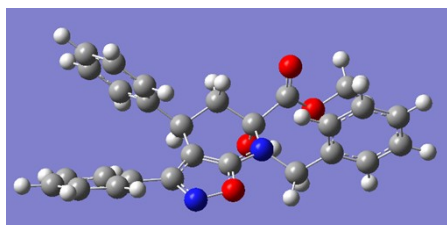

|   |             |             |             |
|---|-------------|-------------|-------------|
| C | -3.65662600 | 1.73856600  | 2.17234600  |
| C | -2.59502900 | 1.18209900  | 1.46198700  |
| C | -2.32349600 | 1.58896700  | 0.15068900  |
| C | -3.12621300 | 2.57665900  | -0.42739000 |
| C | -4.18917300 | 3.13846500  | 0.28120600  |
| C | -4.46000500 | 2.71723100  | 1.58311000  |
| H | -3.86233000 | 1.40205100  | 3.18480200  |
| H | -1.98484600 | 0.40787100  | 1.91824400  |
| H | -2.92406300 | 2.89765400  | -1.44688900 |
| H | -4.80843700 | 3.89900100  | -0.18684500 |
| H | -5.29240600 | 3.14557300  | 2.13449100  |
| C | 1.40409100  | 0.97547100  | -0.79646100 |
| C | 2.66120100  | 1.63788100  | -0.18519600 |
| O | 2.74576300  | 2.03819300  | 0.95087000  |
| O | 3.65003200  | 1.70849600  | -1.09414600 |
| C | 0.23350900  | -1.07075900 | -0.42572100 |
| C | -1.01075500 | -0.49819400 | -0.49149800 |
| C | -1.89121700 | -1.61464400 | -0.34959900 |
| O | 0.14822900  | -2.39863300 | -0.25739200 |
| N | -1.23300800 | -2.75576800 | -0.21361900 |
| C | -3.36459700 | -1.63254500 | -0.31945500 |
| C | -4.03846300 | -2.53973600 | 0.51143300  |
| C | -4.10867100 | -0.74358100 | -1.10678300 |
| C | -5.43040700 | -2.54635600 | 0.56140800  |
| H | -3.46030700 | -3.22563000 | 1.12198100  |
| C | -5.50022900 | -0.74776000 | -1.04966500 |
| H | -3.59800600 | -0.05046000 | -1.76548200 |
| C | -6.16492700 | -1.64671800 | -0.21394800 |
| H | -5.94222700 | -3.24879800 | 1.21331400  |
| H | -6.06480700 | -0.04696100 | -1.65792600 |
| H | -7.25036000 | -1.64549000 | -0.16602300 |
| C | 2.61666200  | -1.24329400 | -0.94292100 |



|   |             |             |             |
|---|-------------|-------------|-------------|
| H | 2.28150900  | -2.27757700 | -1.05095400 |
| H | 2.90163500  | -0.90639100 | -1.94696300 |
| C | 3.81482200  | -1.19334100 | -0.01713400 |
| C | 5.10424400  | -1.28907700 | -0.55136600 |
| C | 3.65888300  | -1.08419100 | 1.36731000  |
| C | 6.22139300  | -1.28545700 | 0.28376700  |
| H | 5.23307300  | -1.36202200 | -1.62892900 |
| C | 4.77490400  | -1.07059700 | 2.20424400  |
| H | 2.66107800  | -0.98888300 | 1.78320200  |
| C | 6.05903100  | -1.17337400 | 1.66628400  |
| H | 7.21710200  | -1.36049600 | -0.14484900 |
| H | 4.63993100  | -0.97694300 | 3.27811900  |
| H | 6.92741200  | -1.16193300 | 2.31906200  |
| C | 4.91266900  | 2.21397600  | -0.60899300 |
| H | 5.23922100  | 1.63205000  | 0.25392300  |
| H | 5.61005500  | 2.09929900  | -1.43831700 |
| H | 4.81046400  | 3.26661100  | -0.33447800 |
| N | 1.46364100  | -0.46398700 | -0.47155200 |
| C | 0.16278100  | 1.61702600  | -0.15925800 |
| H | 0.24901600  | 1.51540200  | 0.92491900  |
| H | 0.18137400  | 2.68342900  | -0.39699700 |
| C | -1.16897500 | 0.99026700  | -0.63408100 |
| H | -1.30735600 | 1.25307100  | -1.69083700 |
| O | 1.34356100  | 1.19763200  | -2.19208400 |
| H | 2.25572200  | 1.24045000  | -2.52425600 |

**(R, S)-3c**

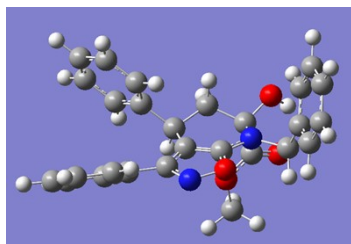

|   |             |             |            |
|---|-------------|-------------|------------|
| C | -3.15290700 | -0.53093100 | 2.96049300 |
| C | -2.11824900 | -0.28099300 | 2.06105600 |
| C | -2.09441200 | 0.90192500  | 1.31353700 |
| C | -3.12128000 | 1.83324800  | 1.49461100 |
| C | -4.15861400 | 1.58768100  | 2.39518900 |
| C | -4.17875500 | 0.40161900  | 3.12914600 |
| H | -3.16276700 | -1.45938200 | 3.52485100 |
| H | -1.33221000 | -1.01718200 | 1.91956200 |
| H | -3.11416400 | 2.75393500  | 0.91491000 |
| H | -4.95309500 | 2.31910400  | 2.51700200 |
| H | -4.98931900 | 0.20257800  | 3.82465000 |

|   |             |             |             |
|---|-------------|-------------|-------------|
| C | 1.60309600  | 1.80715600  | 0.36828100  |
| C | 1.67446300  | 2.88880100  | -0.73138200 |
| O | 2.59990700  | 3.67982000  | -0.79238700 |
| O | 0.67863100  | 2.81365000  | -1.60726100 |
| C | 0.83284200  | -0.22375100 | -0.67848700 |
| C | -0.50317300 | 0.00982100  | -0.46302000 |
| C | -1.13340300 | -1.07856900 | -1.13625300 |
| O | 1.02380800  | -1.33107900 | -1.40908300 |
| N | -0.25662500 | -1.89335500 | -1.70626100 |
| C | -2.56972800 | -1.39250400 | -1.23775800 |
| C | -2.99655700 | -2.72848800 | -1.27526400 |
| C | -3.52550800 | -0.36893900 | -1.29172000 |
| C | -4.35357400 | -3.03112100 | -1.35588200 |
| H | -2.25536300 | -3.51950200 | -1.22874800 |
| C | -4.88255600 | -0.67449300 | -1.36641400 |
| H | -3.20689400 | 0.66719700  | -1.27991600 |
| C | -5.30085700 | -2.00567400 | -1.39652400 |
| H | -4.67292700 | -4.06932300 | -1.37798900 |
| H | -5.61318100 | 0.12869600  | -1.39977000 |
| H | -6.35974400 | -2.24321800 | -1.44919300 |
| C | 3.25519600  | 0.18129500  | -0.71726700 |
| H | 3.24200000  | -0.01606400 | -1.79473500 |
| H | 3.86457800  | 1.07264100  | -0.55427600 |
| C | 3.84917300  | -1.00077500 | 0.02246100  |
| C | 3.98701400  | -0.96211800 | 1.41554400  |
| C | 4.26525900  | -2.13733400 | -0.67382500 |
| C | 4.54074400  | -2.04390100 | 2.09702900  |
| H | 3.65196000  | -0.08118500 | 1.95519900  |
| C | 4.82279800  | -3.22125400 | 0.00751200  |
| H | 4.14182800  | -2.17881100 | -1.75293200 |
| C | 4.96192200  | -3.17637500 | 1.39432700  |
| H | 4.64482200  | -2.00485800 | 3.17811400  |
| H | 5.13881200  | -4.10176700 | -0.54514300 |
| H | 5.39172900  | -4.02018300 | 1.92719000  |
| C | 0.73788900  | 3.73253200  | -2.72190700 |
| H | 1.64784000  | 3.56119400  | -3.30158100 |
| H | -0.14569100 | 3.51392000  | -3.32060600 |
| H | 0.71694800  | 4.76381600  | -2.36235500 |
| N | 1.90075200  | 0.50808600  | -0.26244700 |
| C | 0.25477700  | 1.74408400  | 1.11399200  |
| H | 0.44288900  | 1.10033800  | 1.97908500  |
| H | 0.03938900  | 2.74538000  | 1.49775200  |
| C | -0.96791400 | 1.19475900  | 0.33448400  |
| H | -1.31813200 | 1.98069700  | -0.34552700 |

|   |            |            |            |
|---|------------|------------|------------|
| O | 2.59644600 | 2.11473700 | 1.30576500 |
| H | 3.13536600 | 2.82763600 | 0.90739300 |

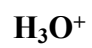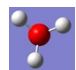

|   |            |             |            |
|---|------------|-------------|------------|
| H | 2.01803300 | 0.20181500  | 0.97321000 |
| O | 2.27030000 | 0.03617000  | 2.58687300 |
| H | 3.01276100 | -0.58409600 | 2.70211800 |
| H | 2.61698500 | 0.89805300  | 2.87755200 |

## REFERENCES:

- [ ] Frisch, M. J.; Trucks, G. W.; Schlegel, H. B.; Scuseria, G. E.; Robb, M. A.; Cheeseman, J. R.; Scalmani, G.; Barone, V.; Petersson, G. A.; Nakatsuji, H.; Li, X.; Caricato, M.; Marenich, A. V.; Bloino, J.; Janesko, B. G.; Gomperts, R.; Mennucci, B.; Hratchian, H. P.; Ortiz, J. V.; Izmaylov, A. F.; Sonnenberg, J. L.; Williams-Young, D.; Ding, F.; Lipparini, F.; Egidi, F.; Goings, J.; Peng, B.; Petrone, A.; Henderson, T.; Ranasinghe, D.; Zakrzewski, V. G.; Gao, J.; Rega, N.; Zheng, G.; Liang, W.; Hada, M.; Ehara, M.; Toyota, K.; Fukuda, R.; Hasegawa, J.; Ishida, M.; Nakajima, T.; Honda, Y.; Kitao, O.; Nakai, H.; Vreven, T.; Throssell, K.; Jr. Montgomery, J. A.; Peralta, J. E.; Ogliaro, F.; Bearpark, M. J.; Heyd, J. J.; Brothers, E. N.; Kudin, K. N.; Staroverov, V. N.; Keith, T. A.; Kobayashi, R.; Normand, J.; Raghavachari, K.; Rendell, A. P.; Burant, J. C.; Iyengar, S. S.; Tomasi, J.; Cossi, M.; Millam, J. M.; Klene, M.; Adamo, C.; Cammi, R.; Ochterski, J. W.; Martin, R. L.; Morokuma, K.; Farkas, O.; Foresman, J. B.; Fox, D. J. Gaussian 16, Revision C.01, Gaussian, Inc., Wallingford CT, **2016**.
- [2] (a) Becke, A. D. *J. Chem. Phys.* **1993**, *98*, 5648. (b) Lee, C. T.; Yang, W. T.; Parr, R. G. *Phys. Rev. B* **1988**, *37*, 785.
- [3] (a) Grimme, S.; Antony, J.; Ehrlich, S.; Krieg, H. *J. Chem. Phys.* **2010**, *132*, 154104; (b) Grimme, S.; Ehrlich, S.; Goerigk, L. *J. Comput. Chem.* **2011**, *32*, 1456.
- [4] Marenich, A. V.; Cramer, C. J.; Truhlar, D. G. *J. Phys. Chem. B* **2009**, *113*, 6378.
- [5] Andrae, D.; Häußermann, U.; Dolg, M.; Stoll, H.; Preuß, H. *Theor. Chim. Acta* **1990**, *77*, 123.
- [6] Hehre, W. J.; Radom, L.; Schleyer, P. v. R.; Pople, J. A., *Ab Initio Molecular Orbital Theory*; Wiley: New York, **1986**.
- [7] (a) Fukui, K. *Acc. Chem. Res.* **1981**, *14*, 363. (b) Fukui, K. *J. Phys. Chem.*, **1970**, *74*, 4161.
- [8] Legault, C. Y. CYLview, 1.0b; Université de Sherbrooke, **2009**; <http://www.cylview.org>.
- [9] Humphrey, W.; Dalke, A.; Schulten, K.; *J. Molec. Graphics*, **1996**, *14*, 33.

## Part II NMR spectra

### $^1\text{H}$ NMR and $^{13}\text{C}$ NMR of **3a**

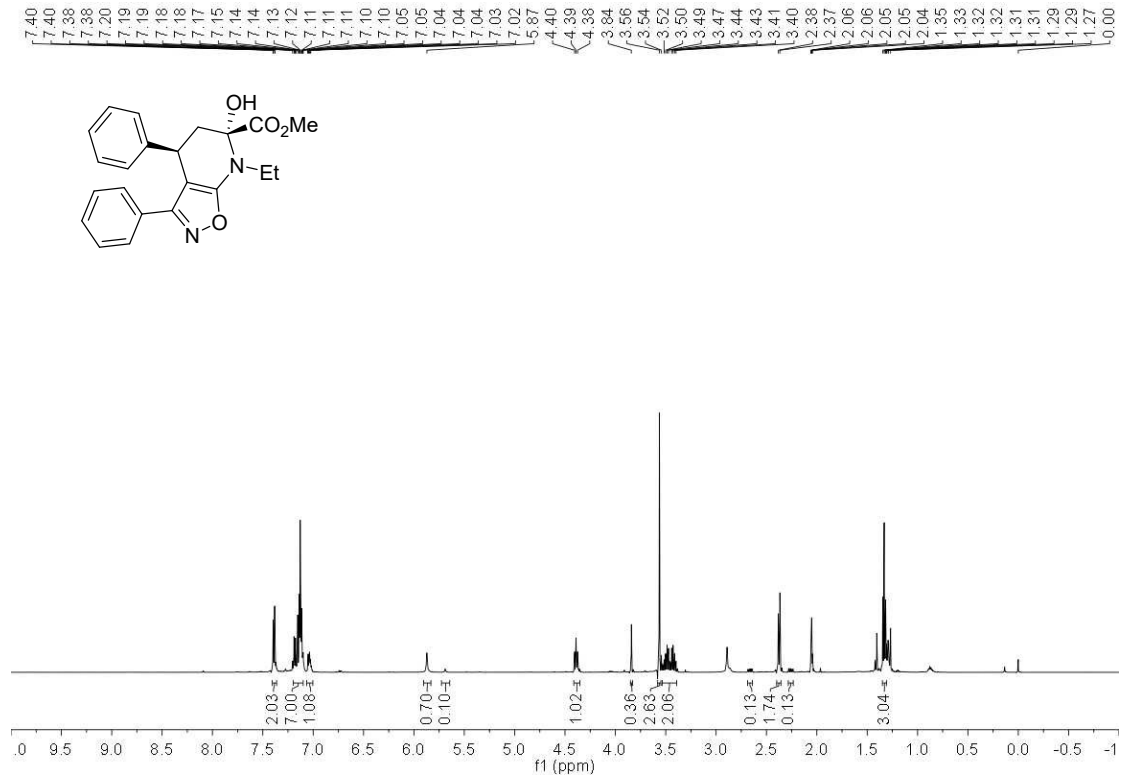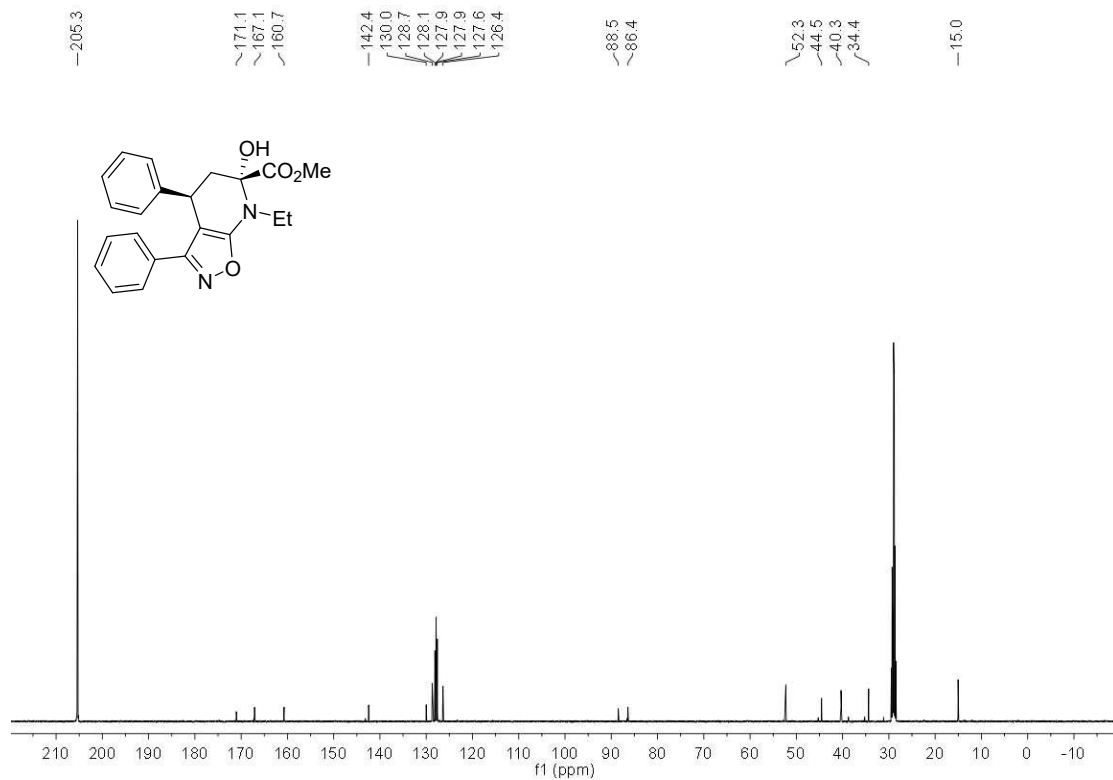

$^1\text{H}$  NMR and  $^{13}\text{C}$  NMR of **3b**

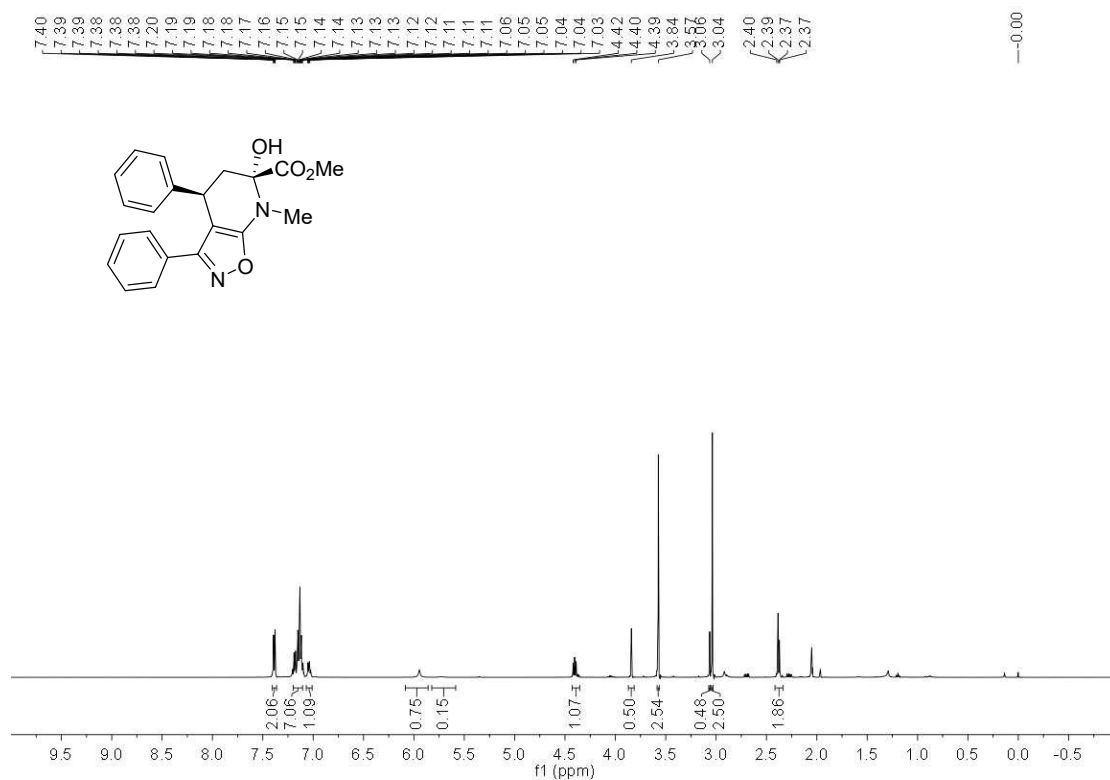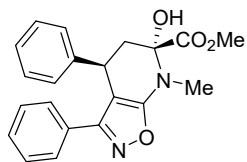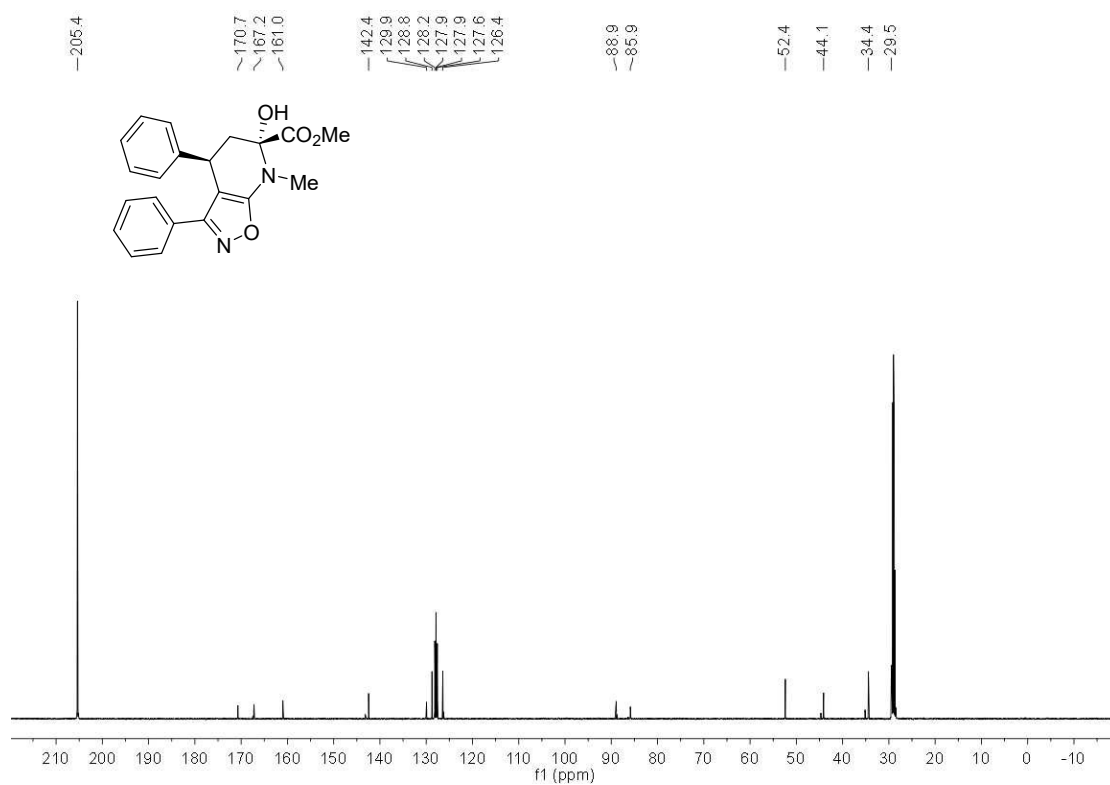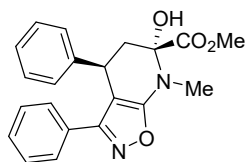

$^1\text{H}$  NMR and  $^{13}\text{C}$  NMR of **3c**

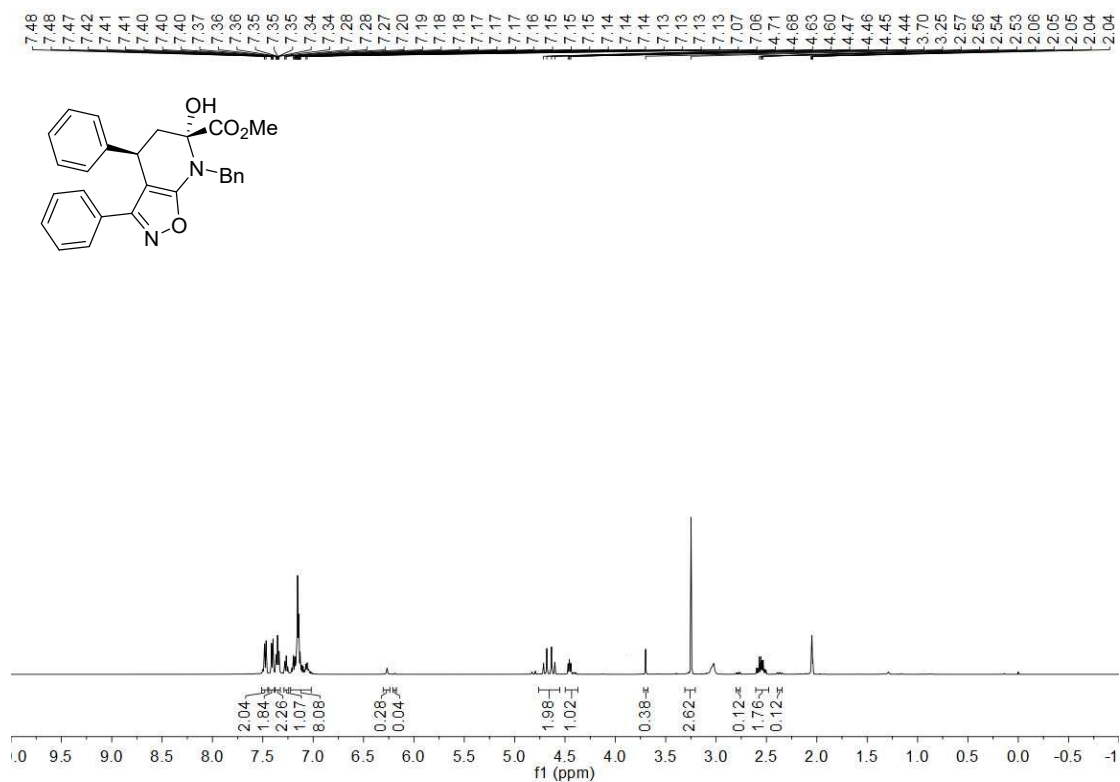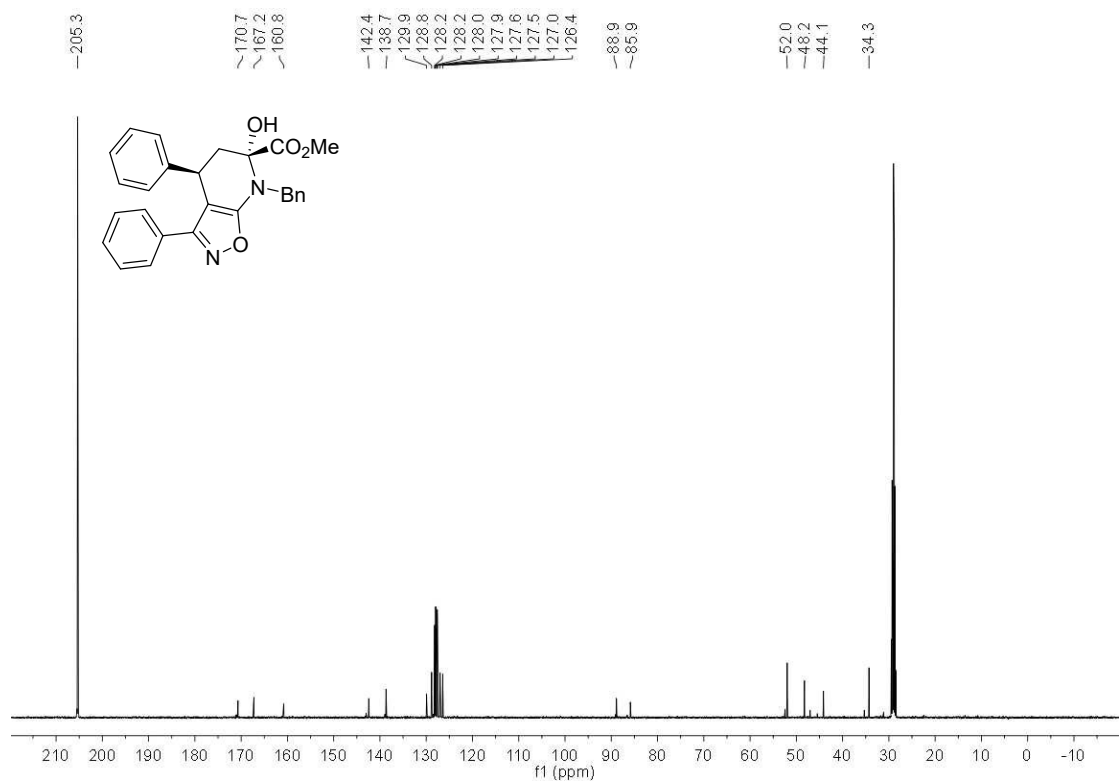

# <sup>1</sup>H NMR and <sup>13</sup>C NMR of 3d

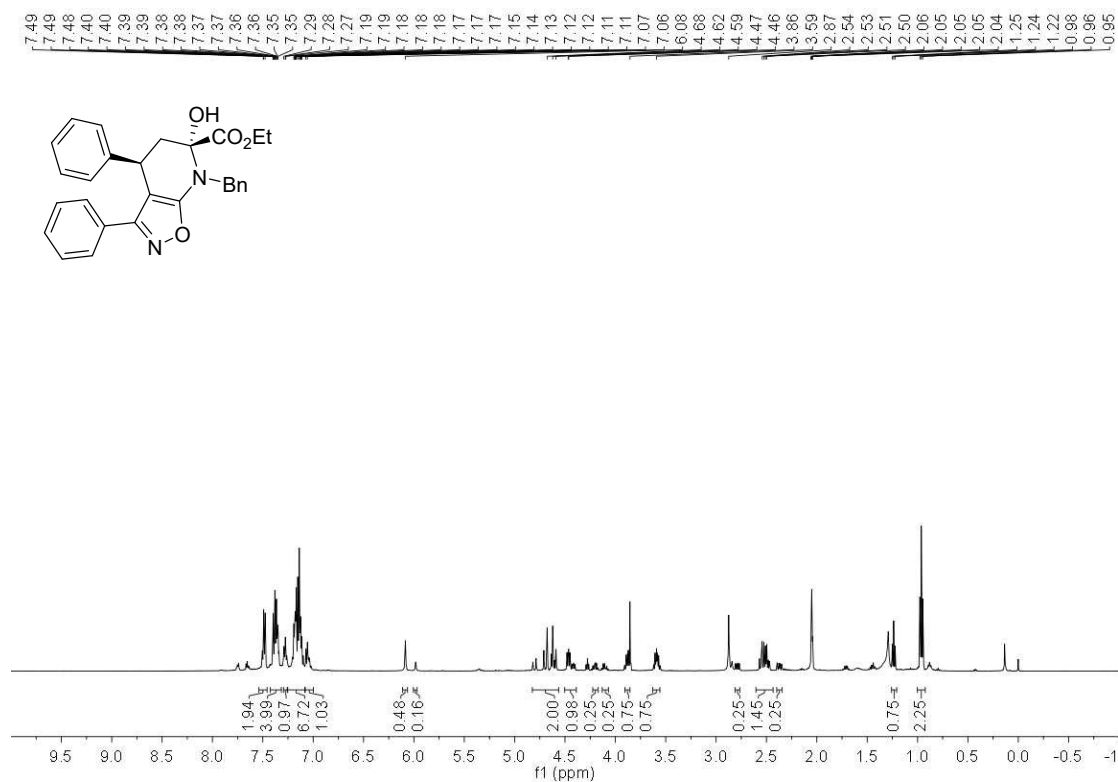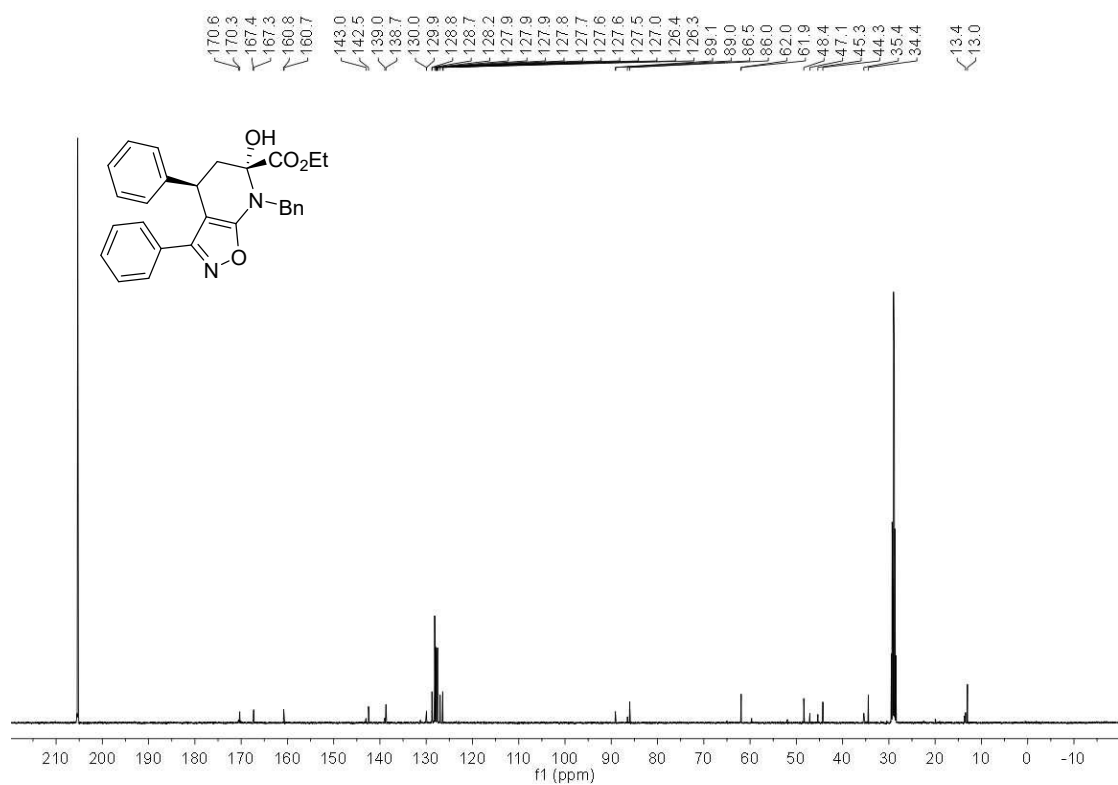



$^1\text{H}$  NMR and  $^{13}\text{C}$  NMR of **3e**

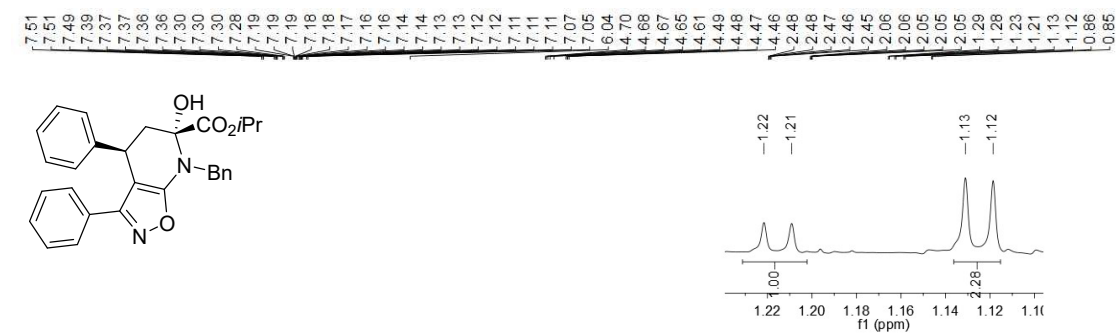

$^1\text{H}$  NMR of the crude product

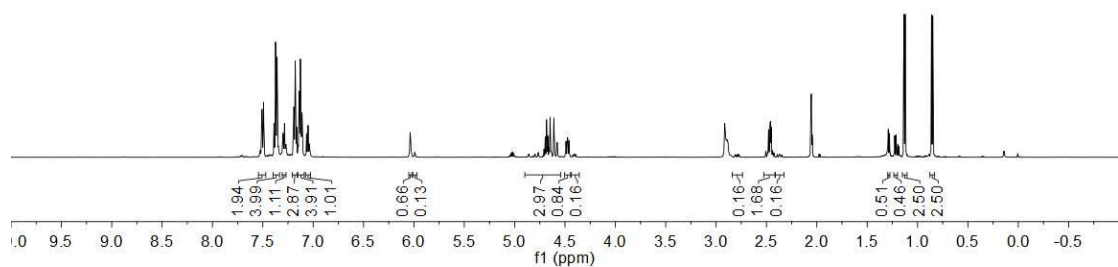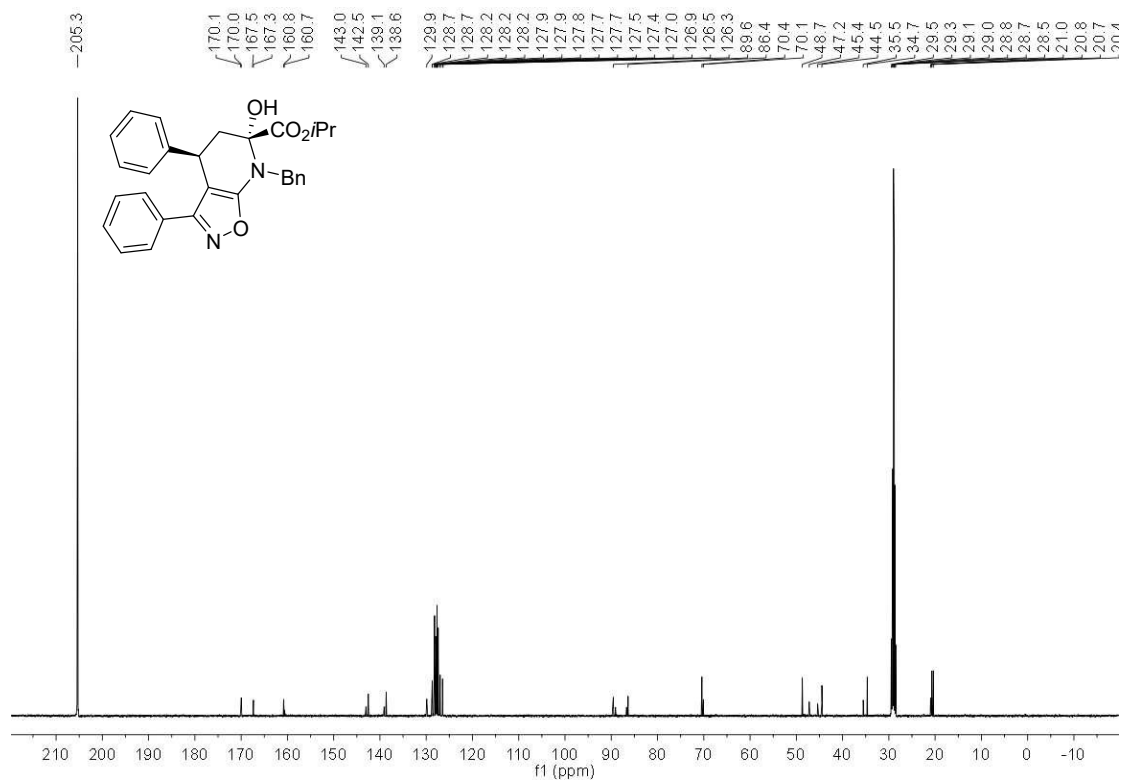

# <sup>1</sup>H NMR and <sup>13</sup>C NMR of 3f

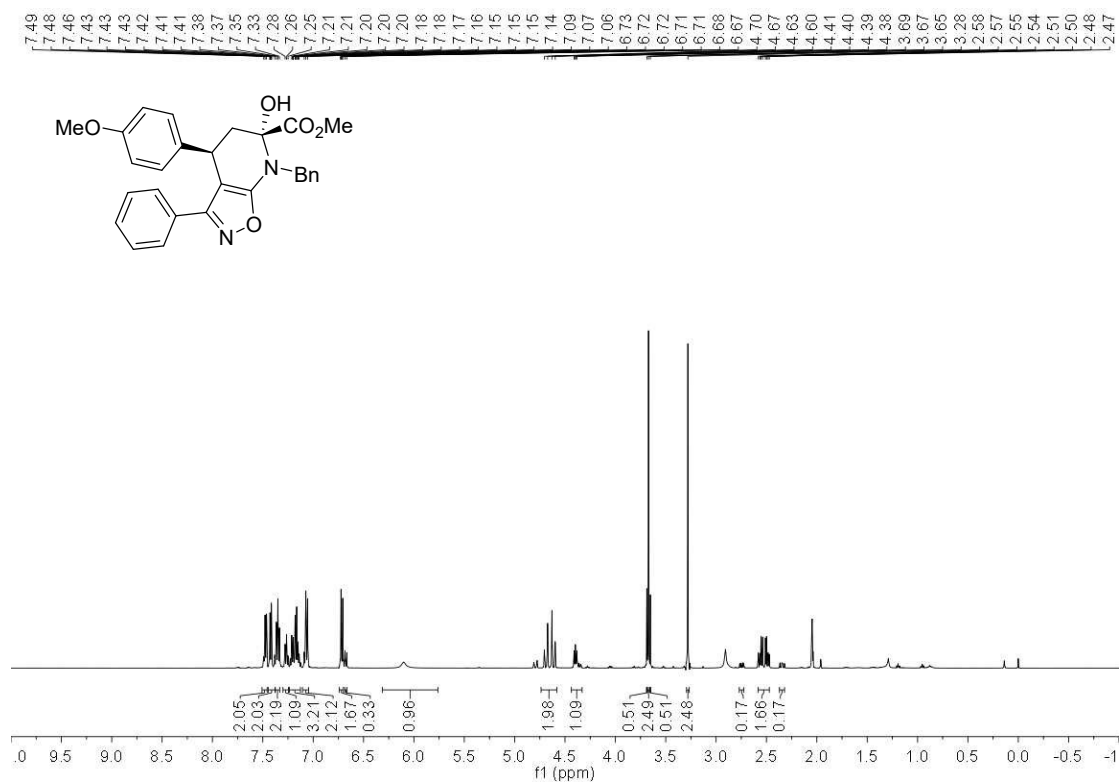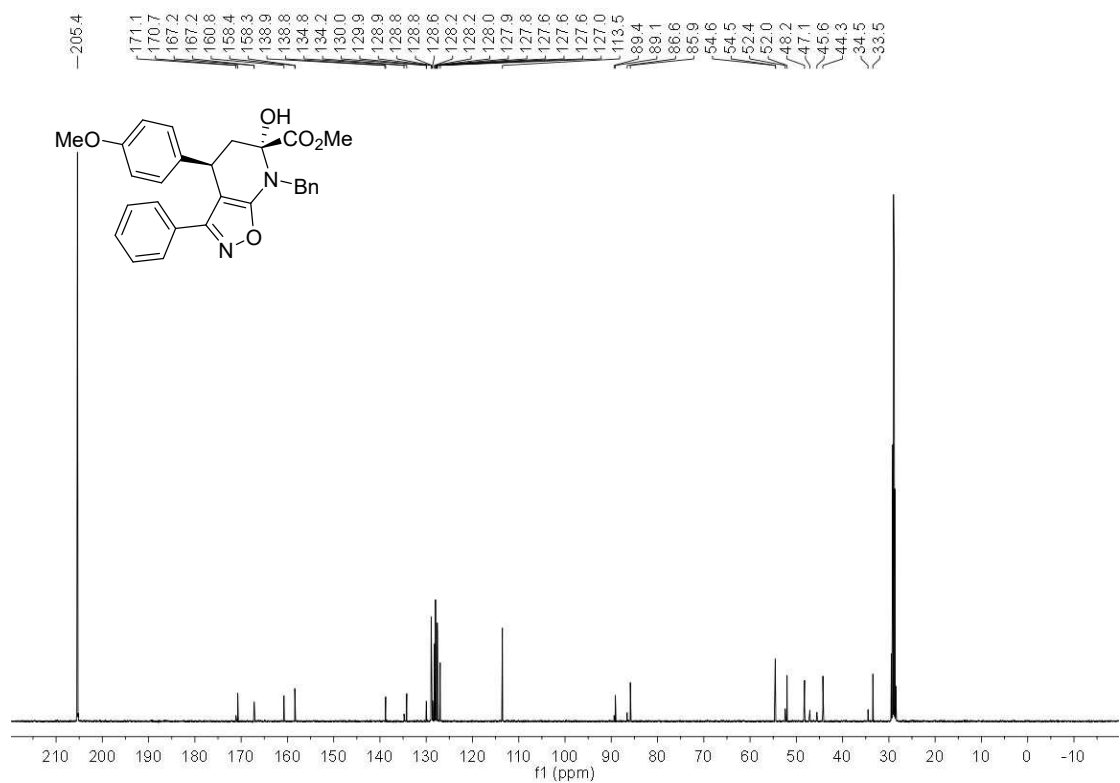

# <sup>1</sup>H NMR and <sup>13</sup>C NMR of **3g**

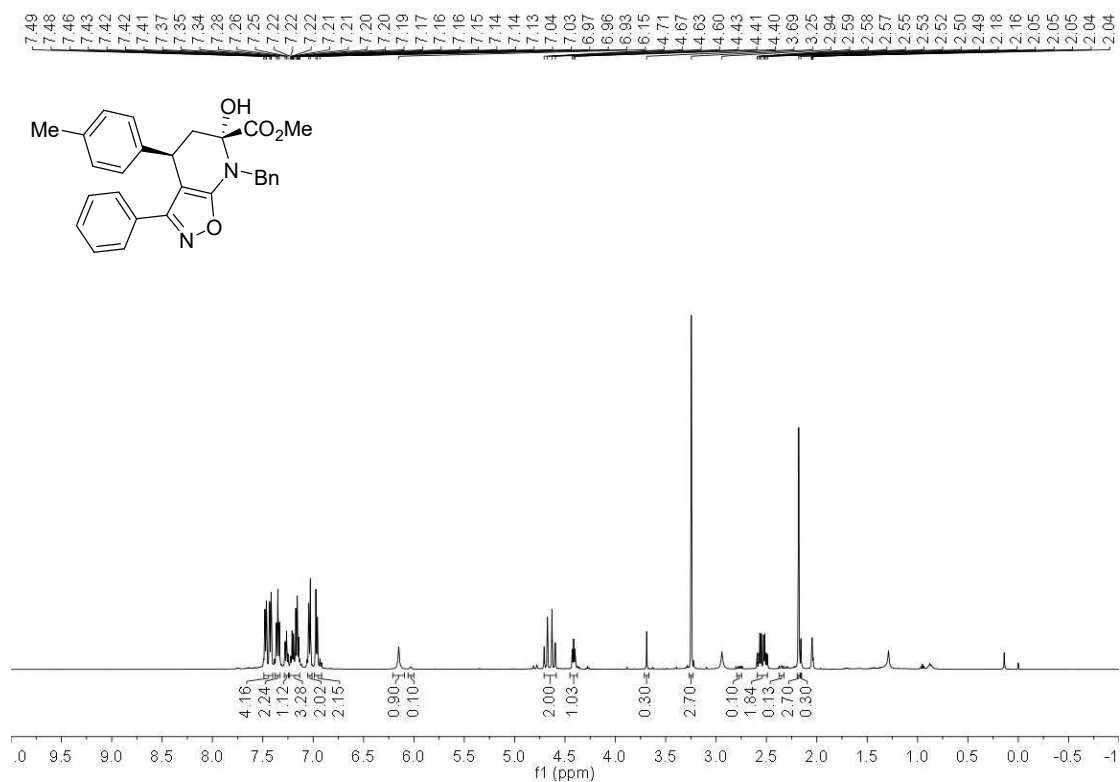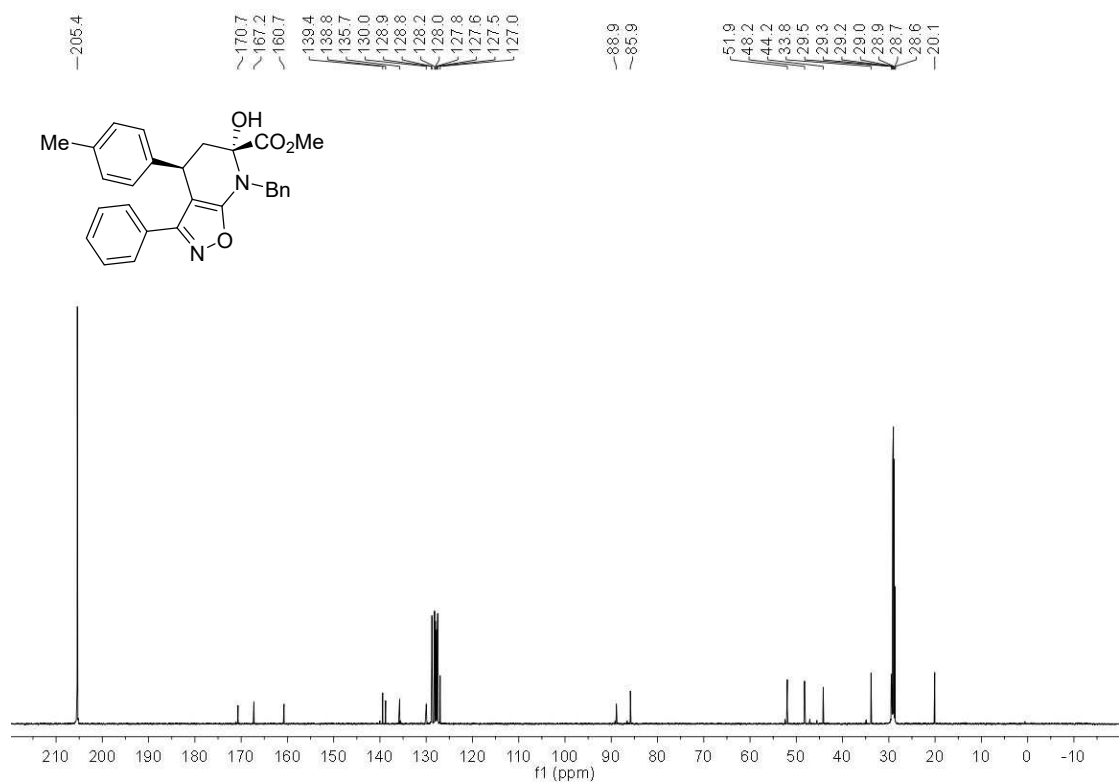

<sup>1</sup>H NMR, <sup>13</sup>C NMR and <sup>19</sup>F NMR of **3h**

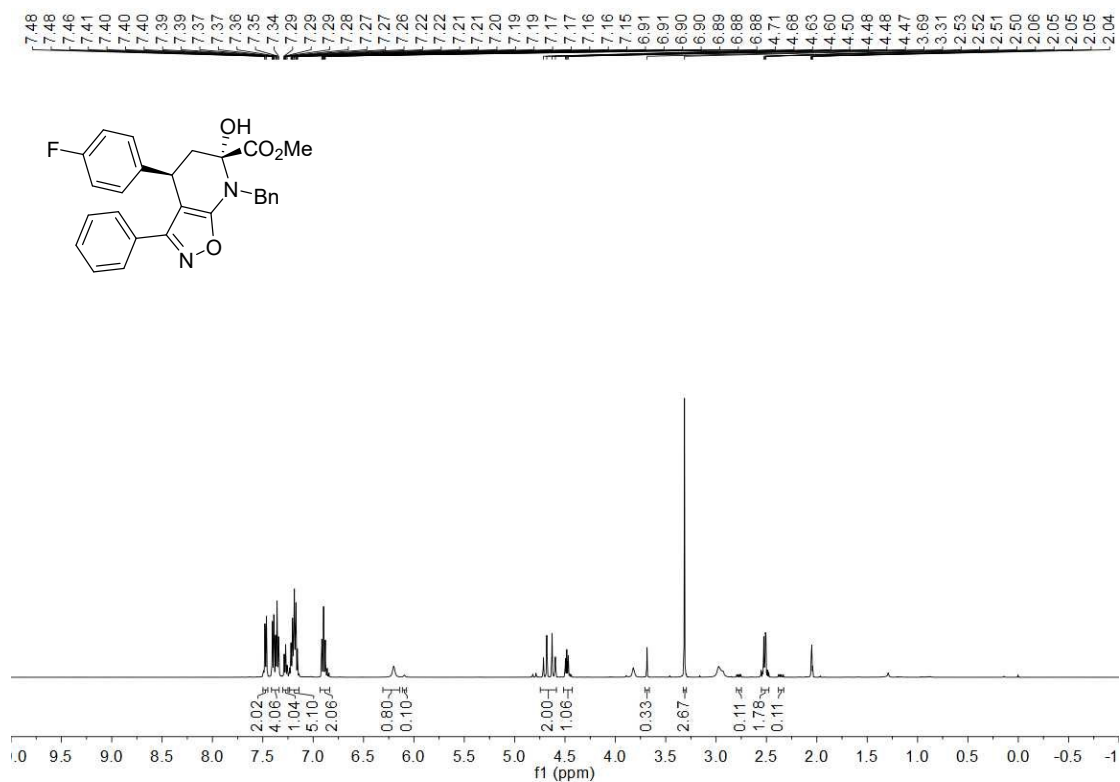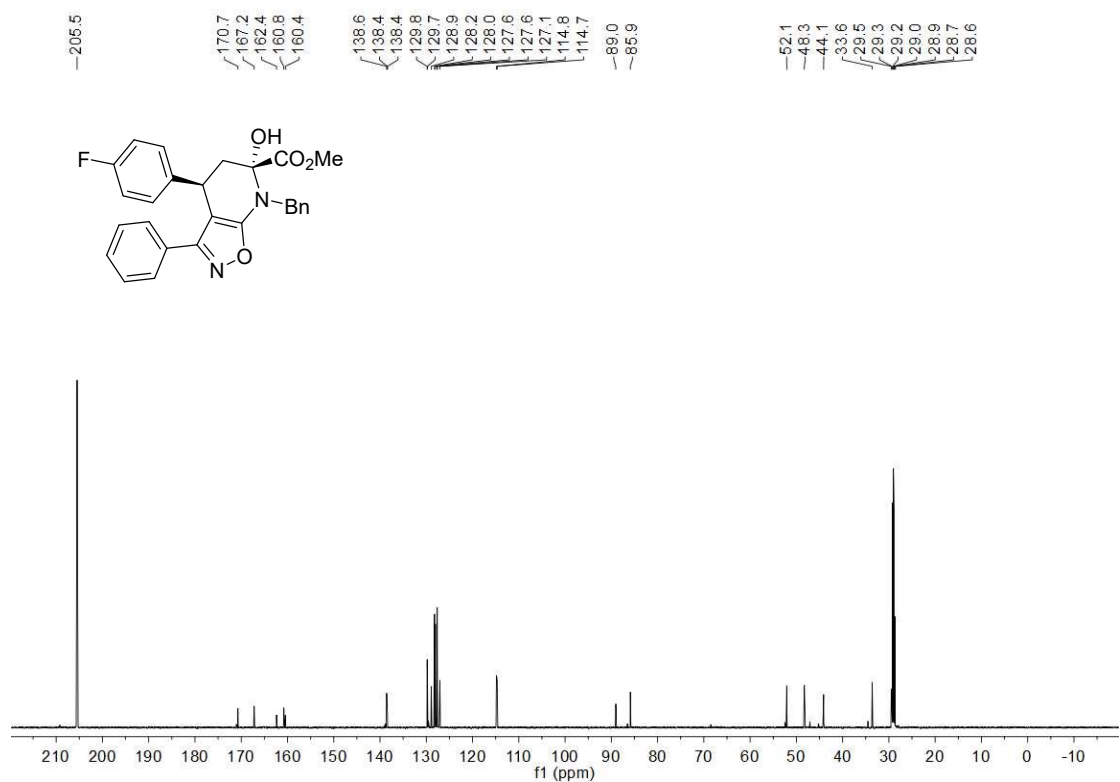

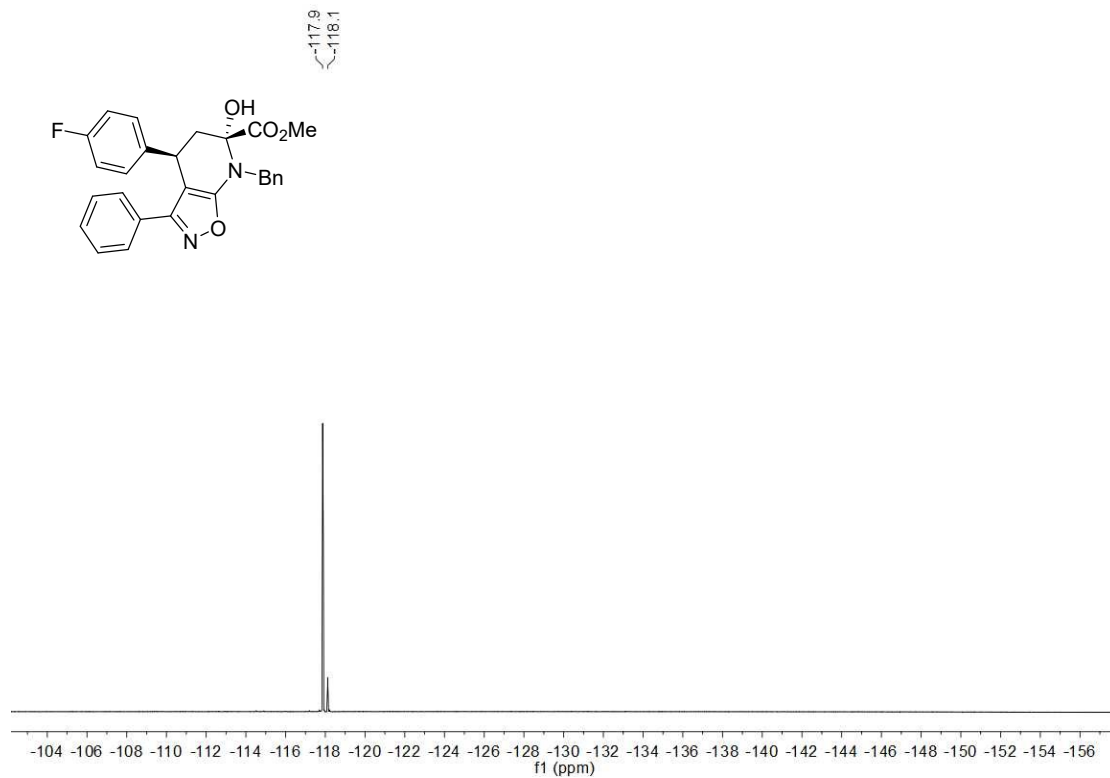

<sup>1</sup>H NMR and <sup>13</sup>C NMR of **3i**

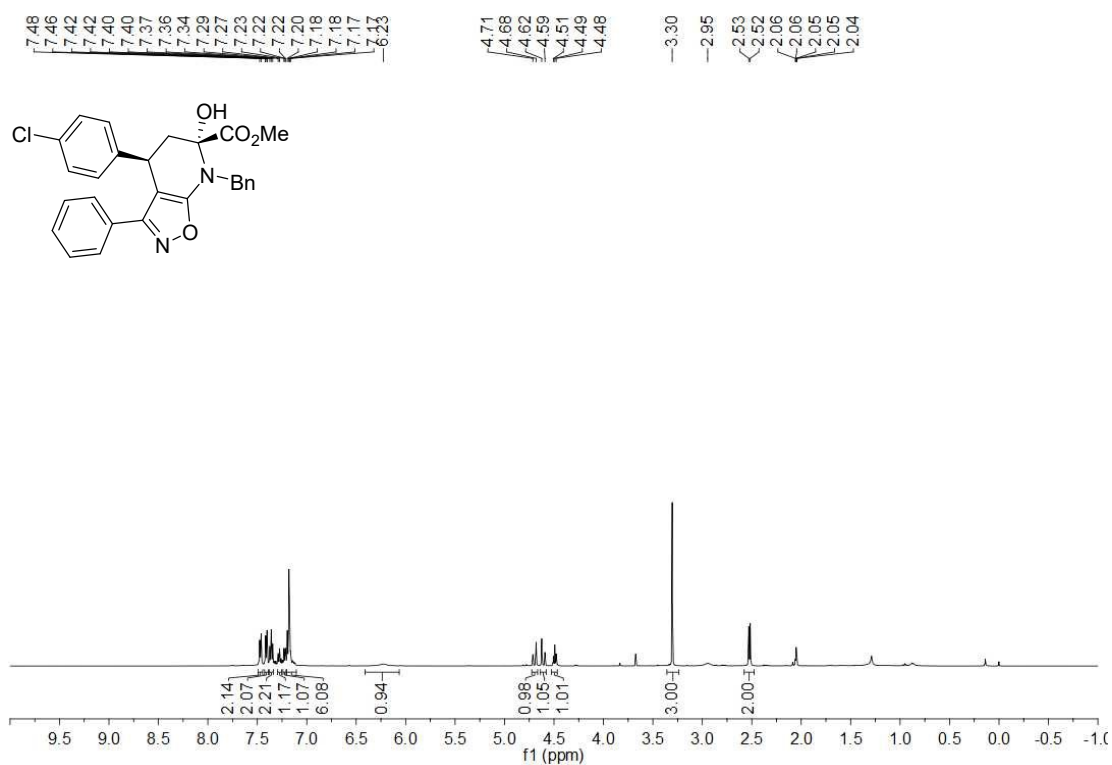

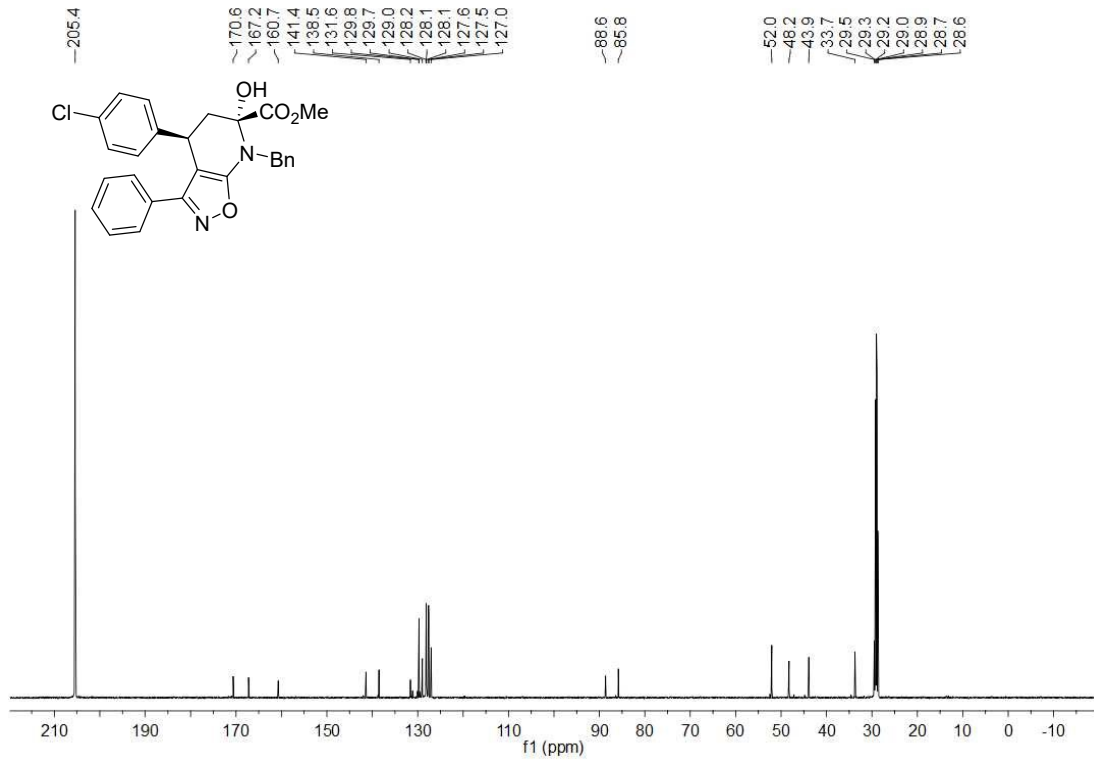

<sup>1</sup>H NMR and <sup>13</sup>C NMR of **3j**

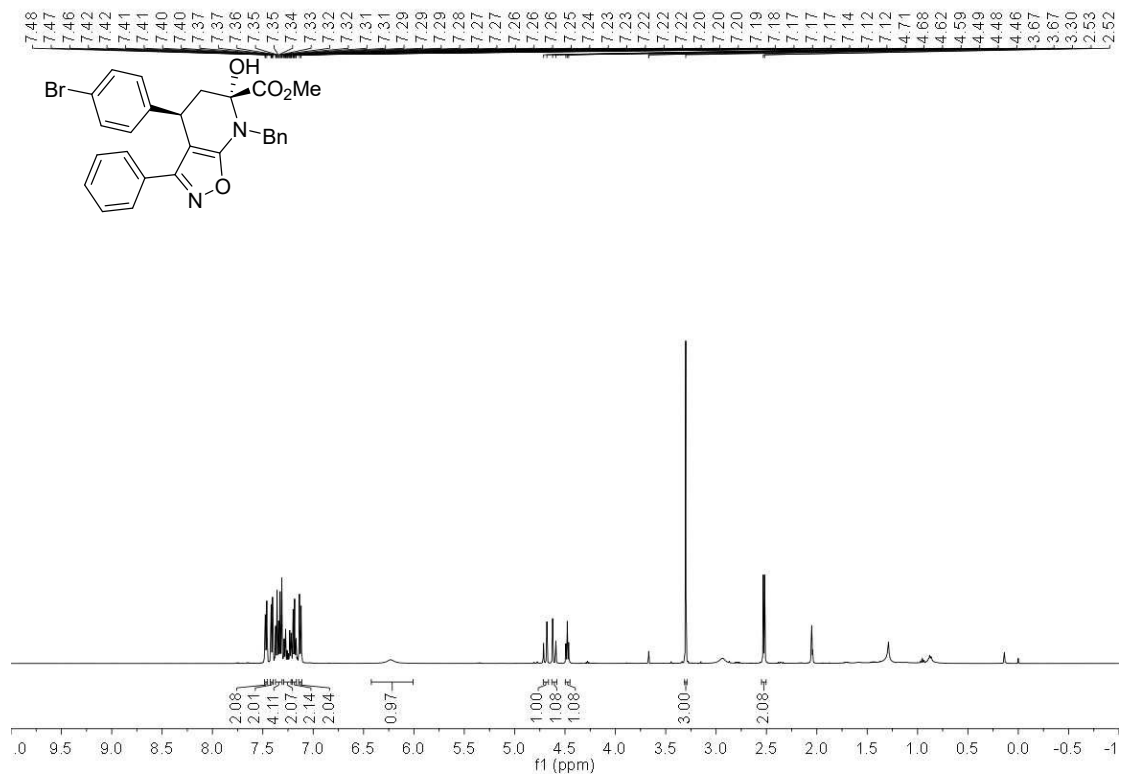

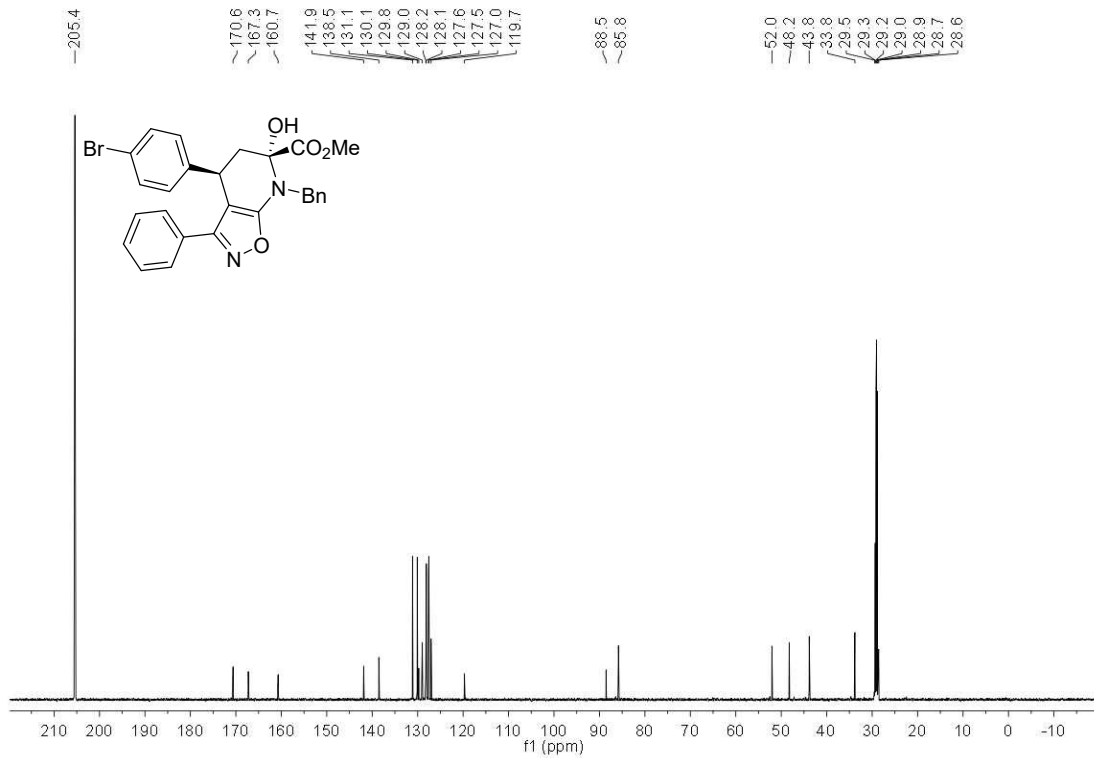

<sup>1</sup>H NMR, <sup>13</sup>C NMR and <sup>13</sup>F NMR of **3k**

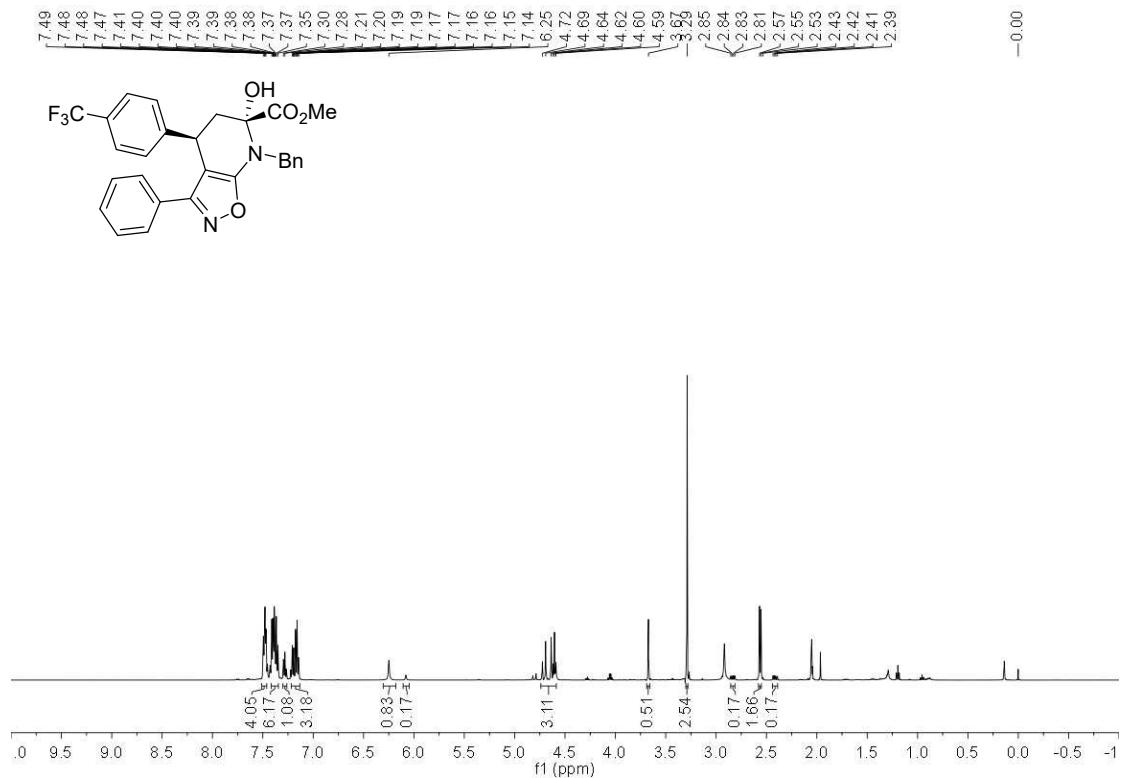

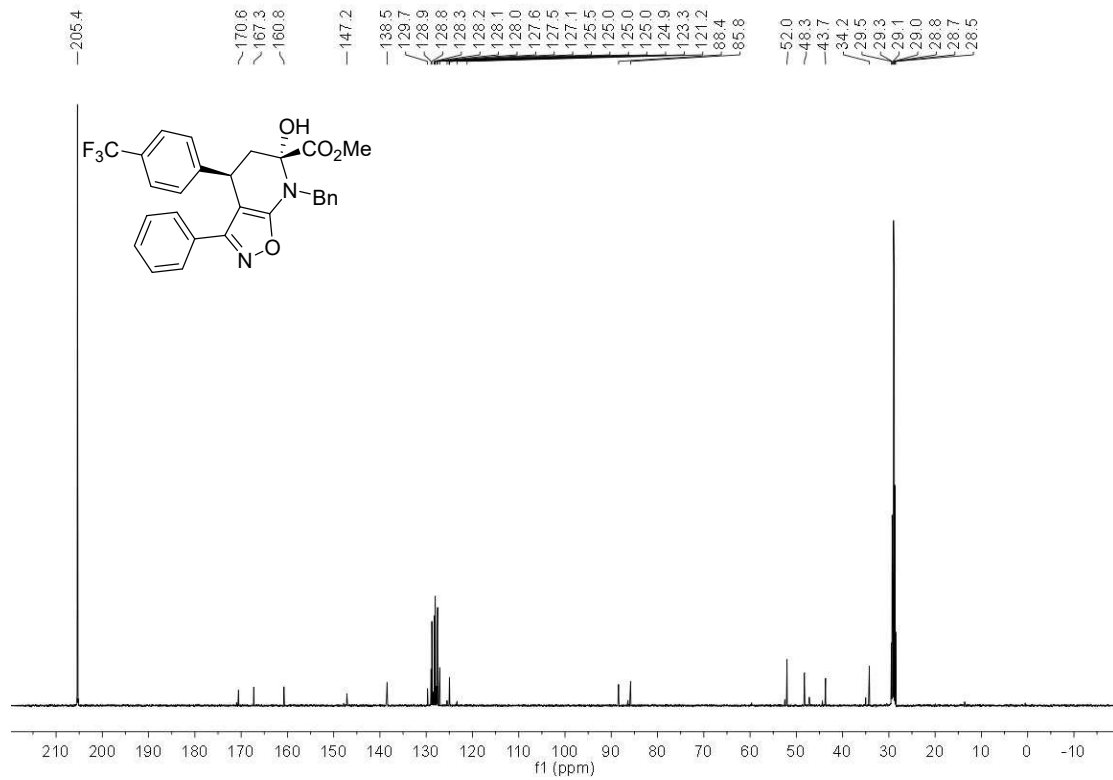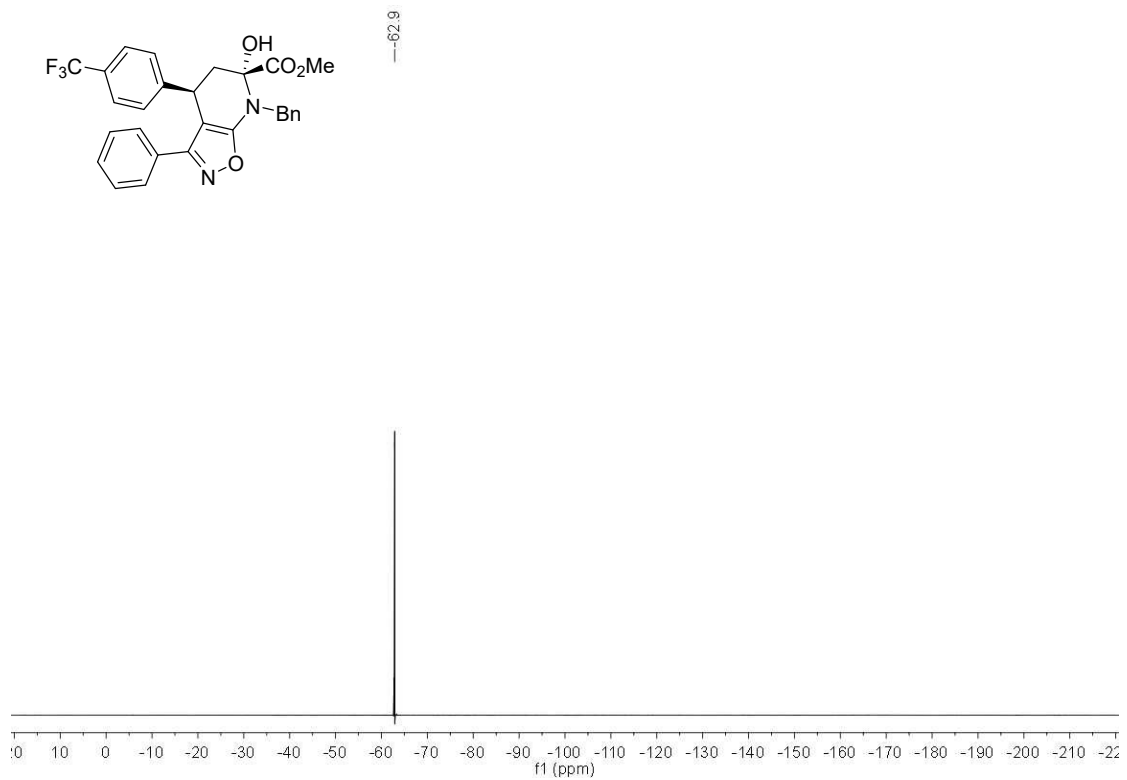



$^1\text{H}$  NMR and  $^{13}\text{C}$  NMR of **31**

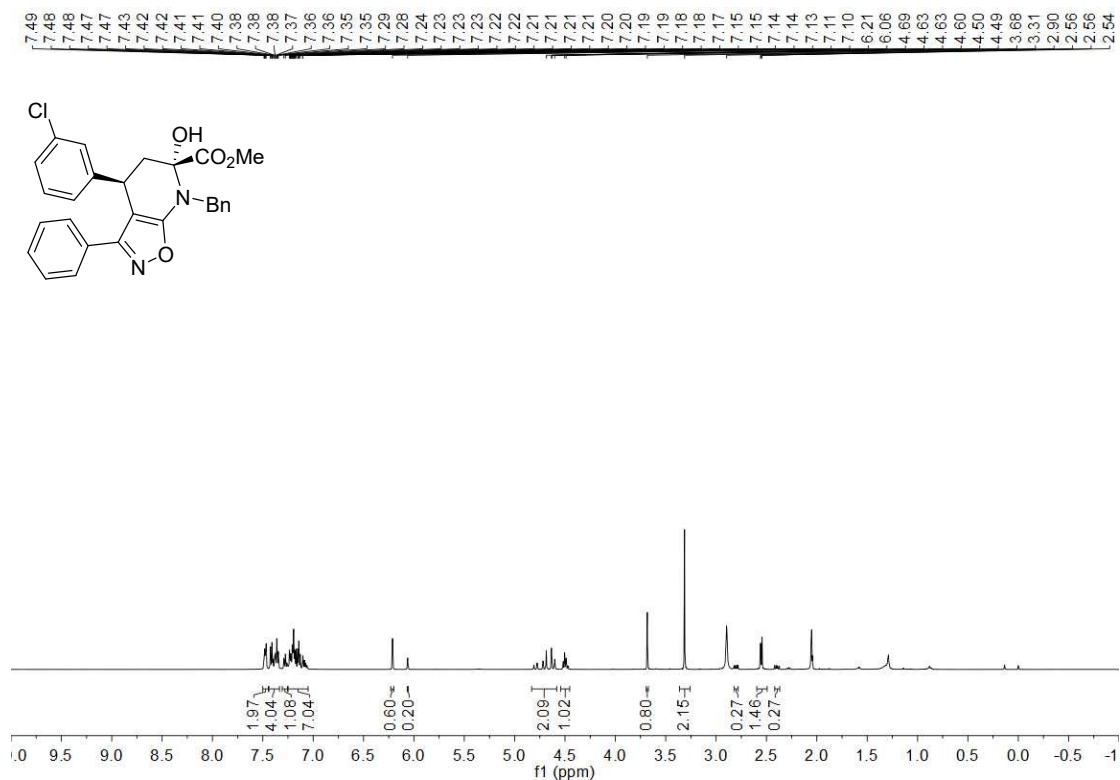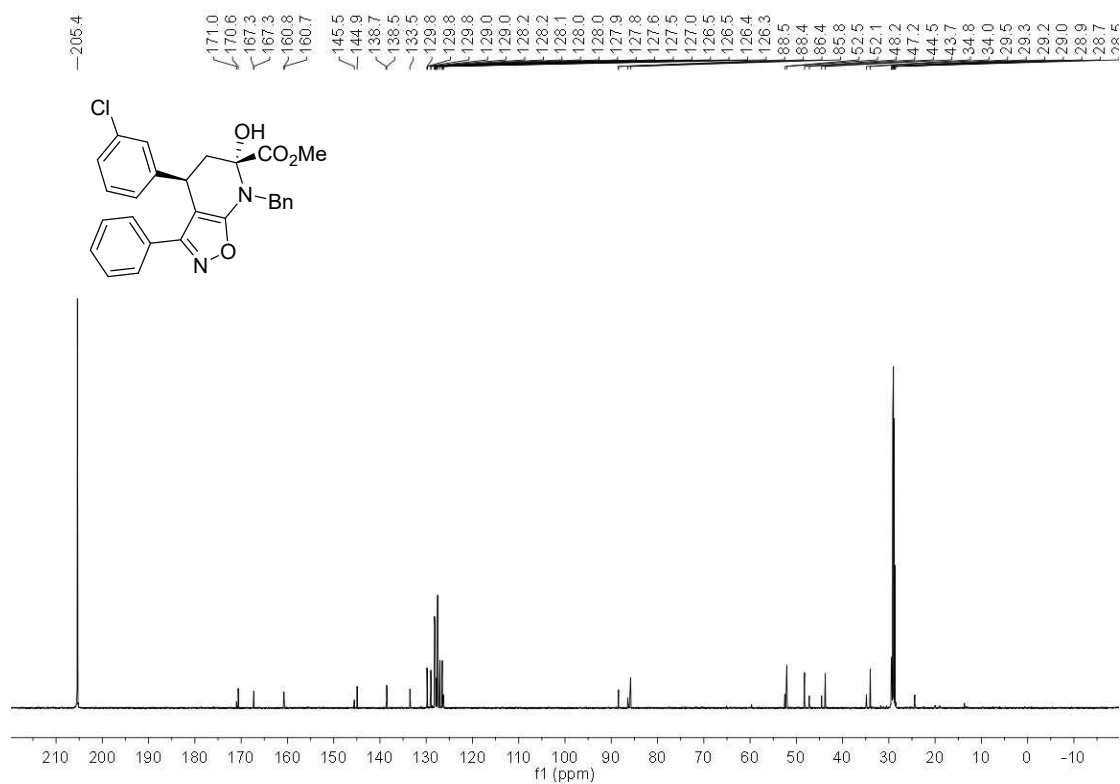

# $^1\text{H}$ NMR and $^{13}\text{C}$ NMR of **3m**

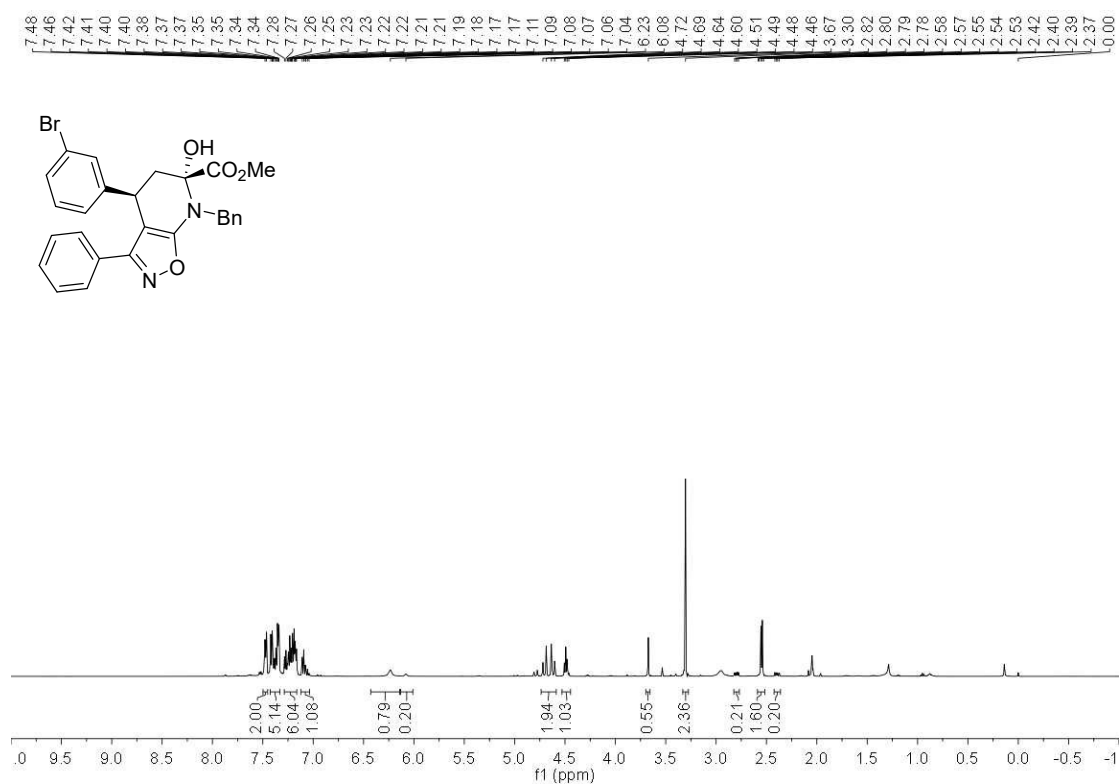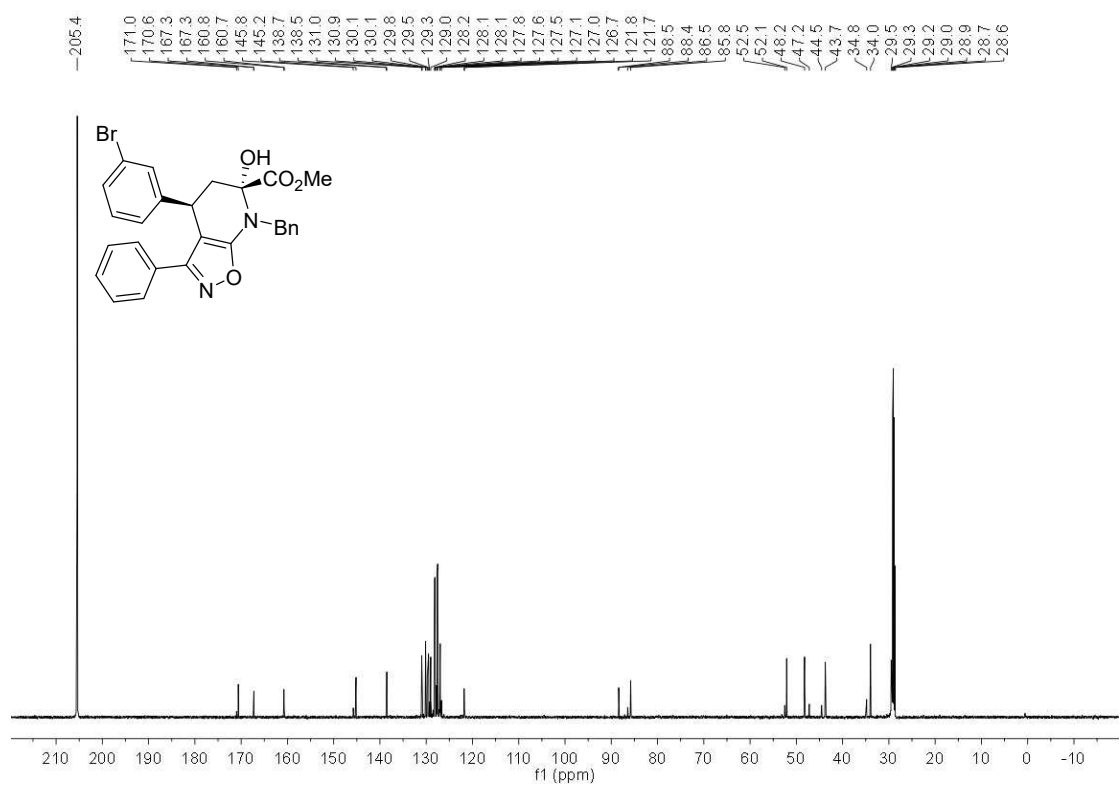

$^1\text{H}$  NMR and  $^{13}\text{C}$  NMR of **3n**

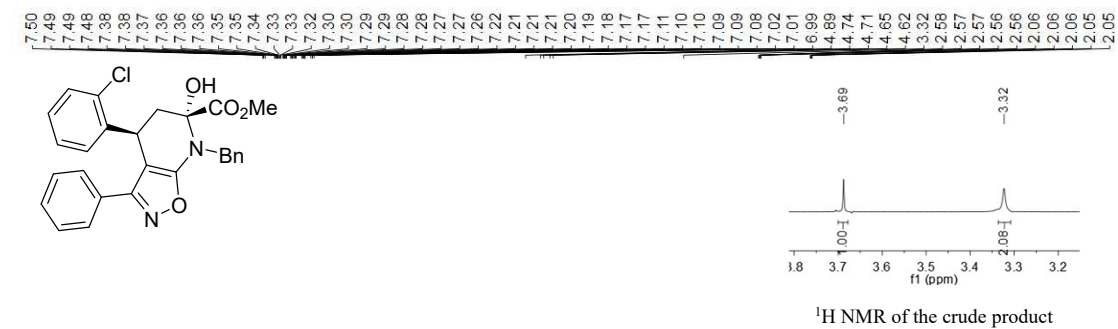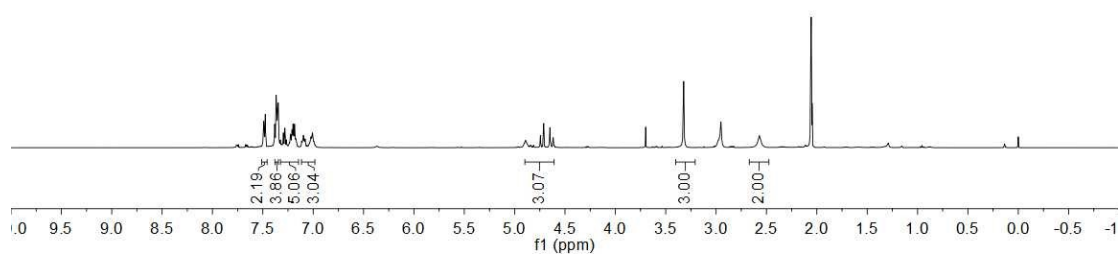

$^1\text{H}$  NMR and  $^{13}\text{C}$  NMR of **30**

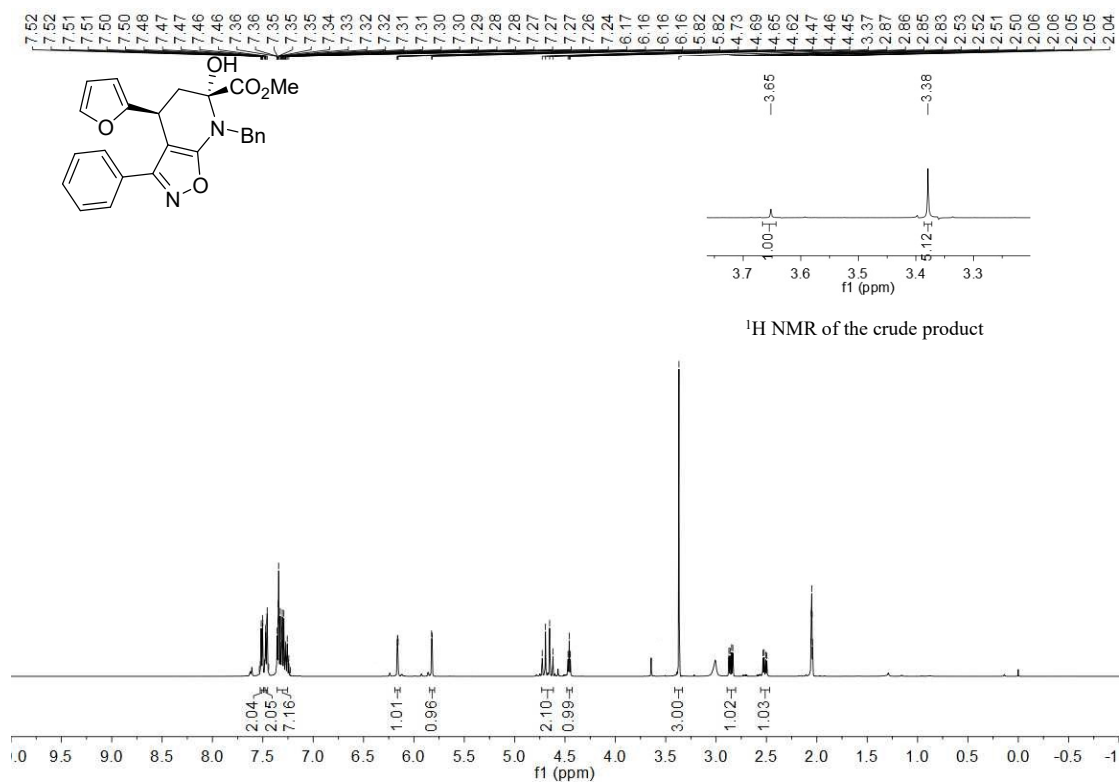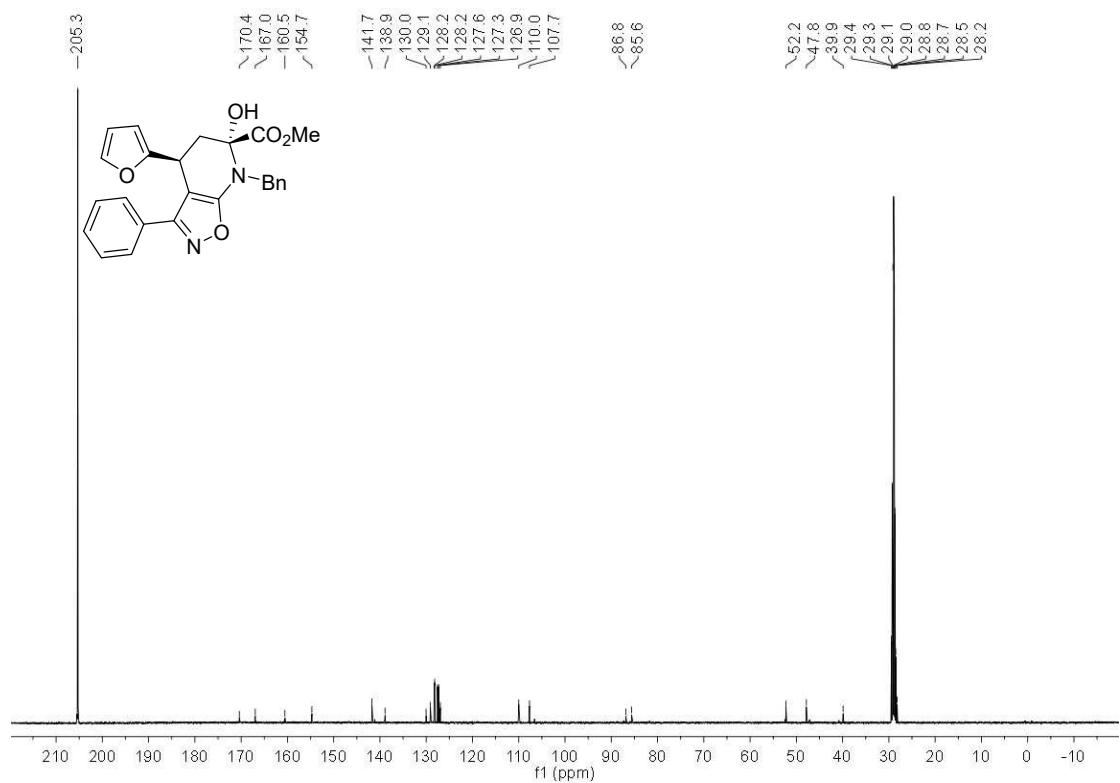

# $^1\text{H}$ NMR and $^{13}\text{C}$ NMR of **3p**

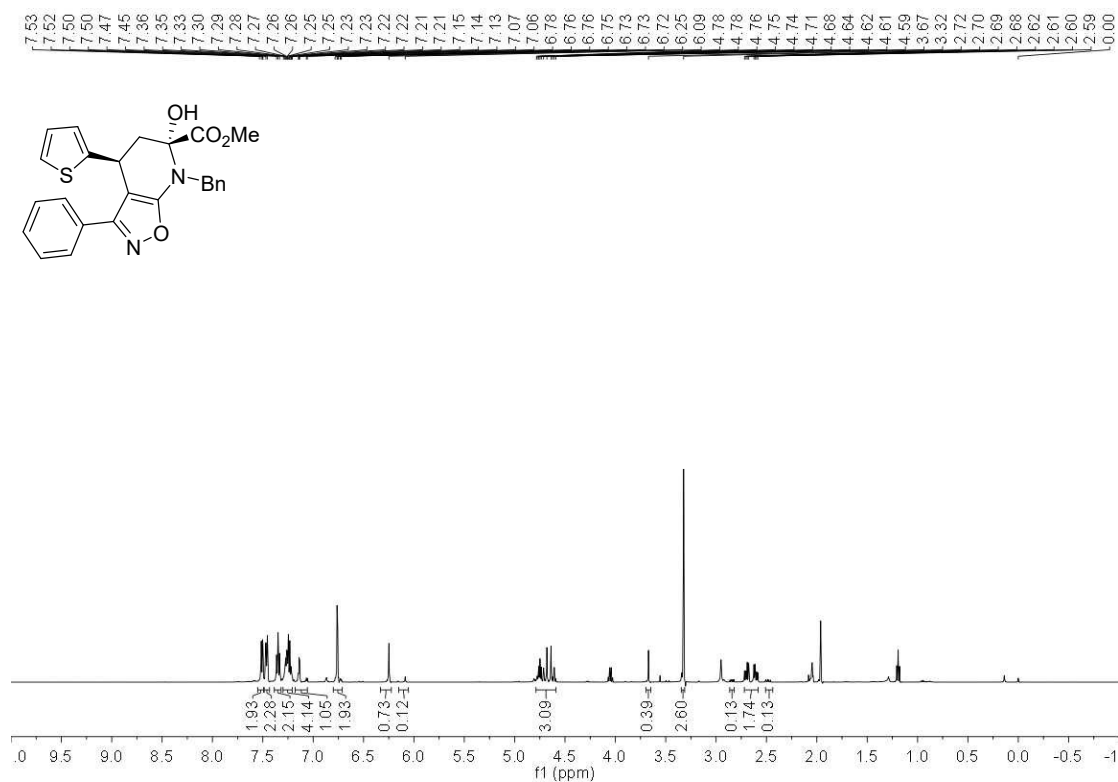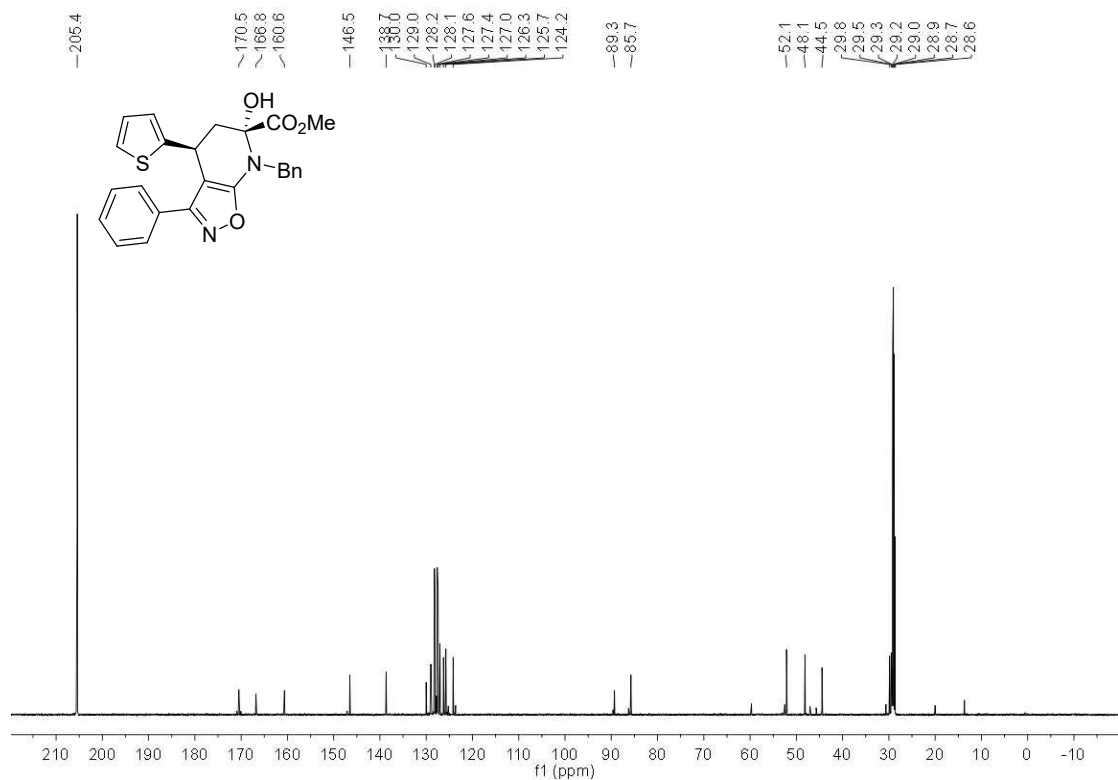

# $^1\text{H}$ NMR and $^{13}\text{C}$ NMR of **3q**

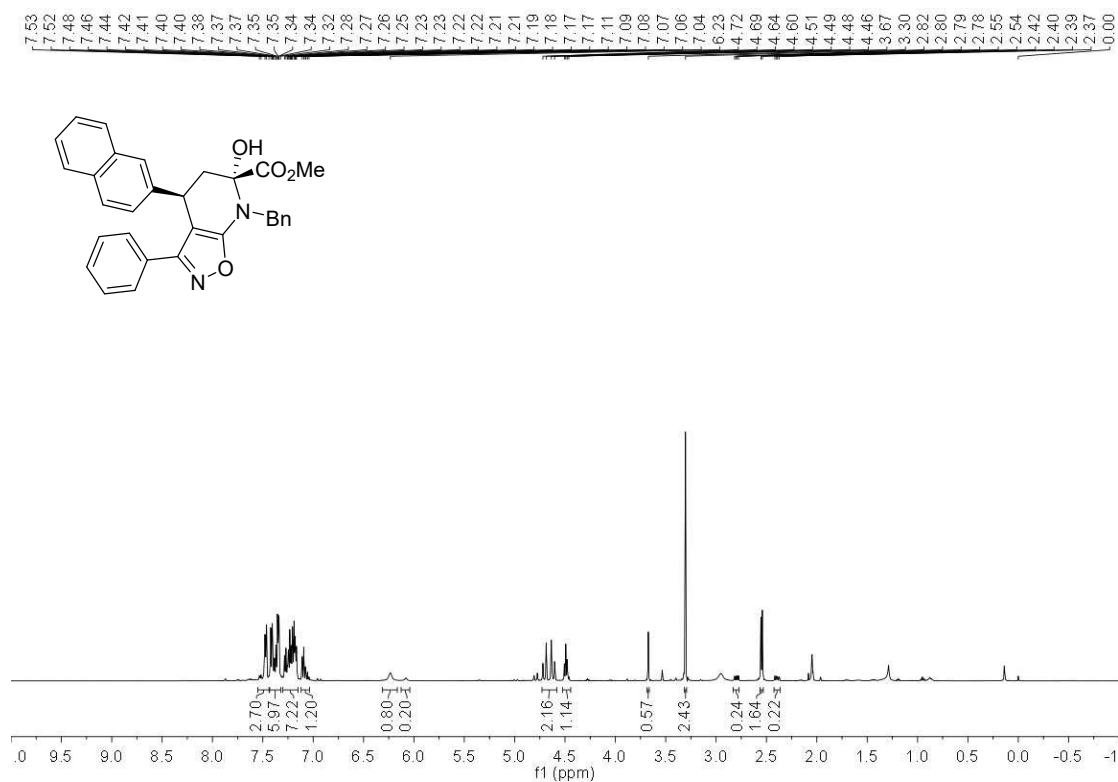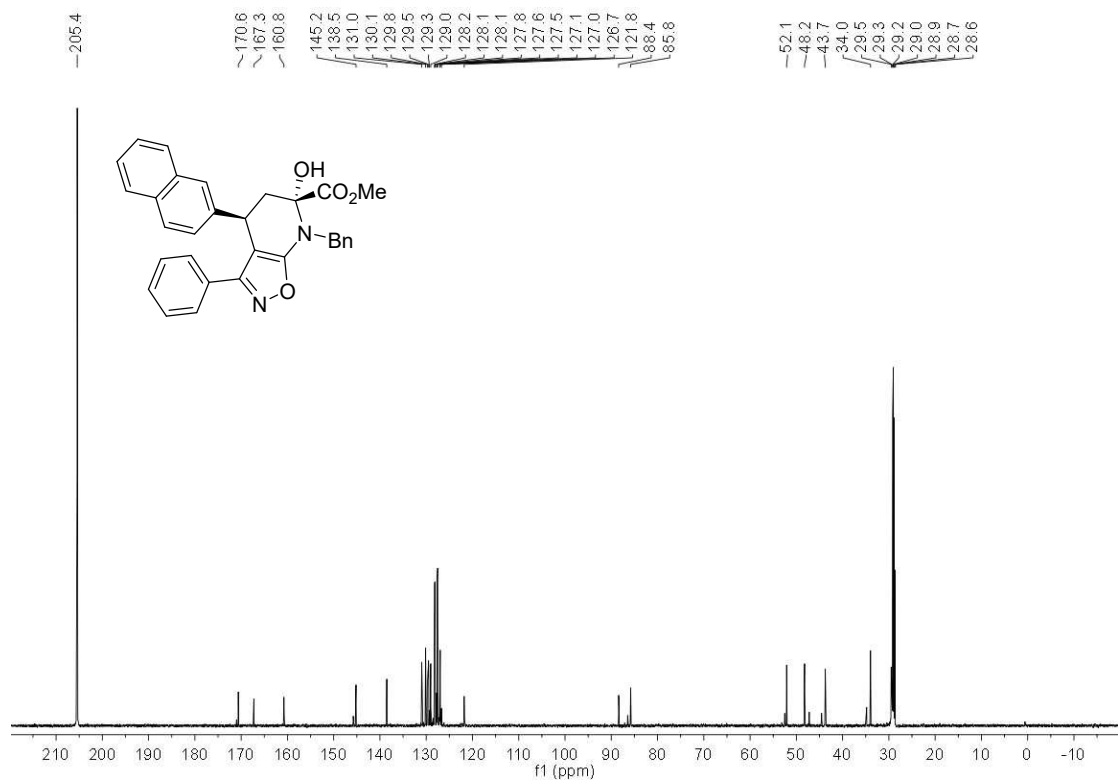

$^1\text{H}$  NMR,  $^{13}\text{C}$  NMR and  $^{19}\text{F}$  NMR of **3r**

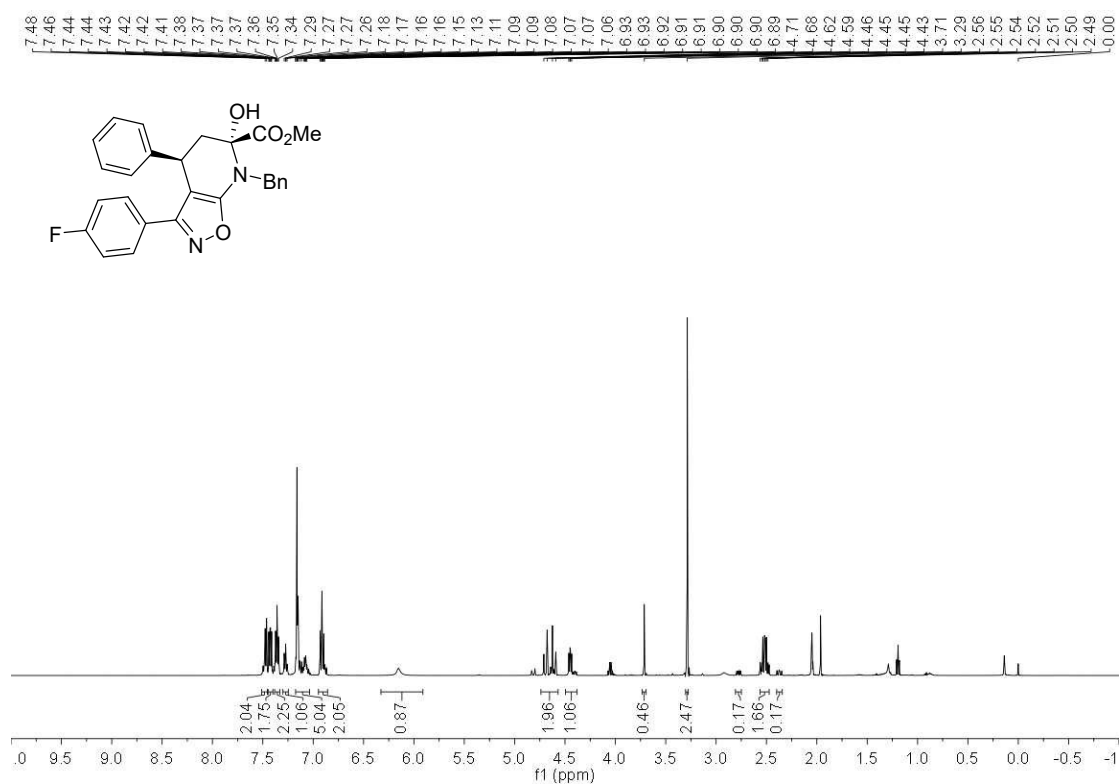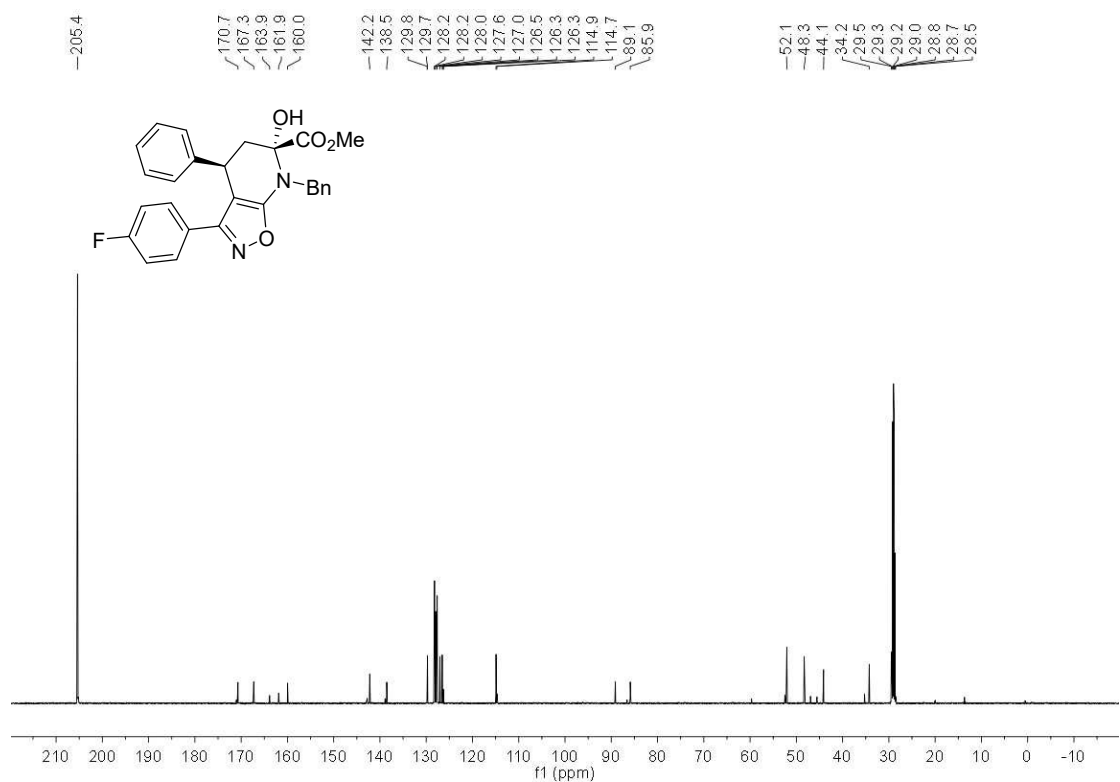

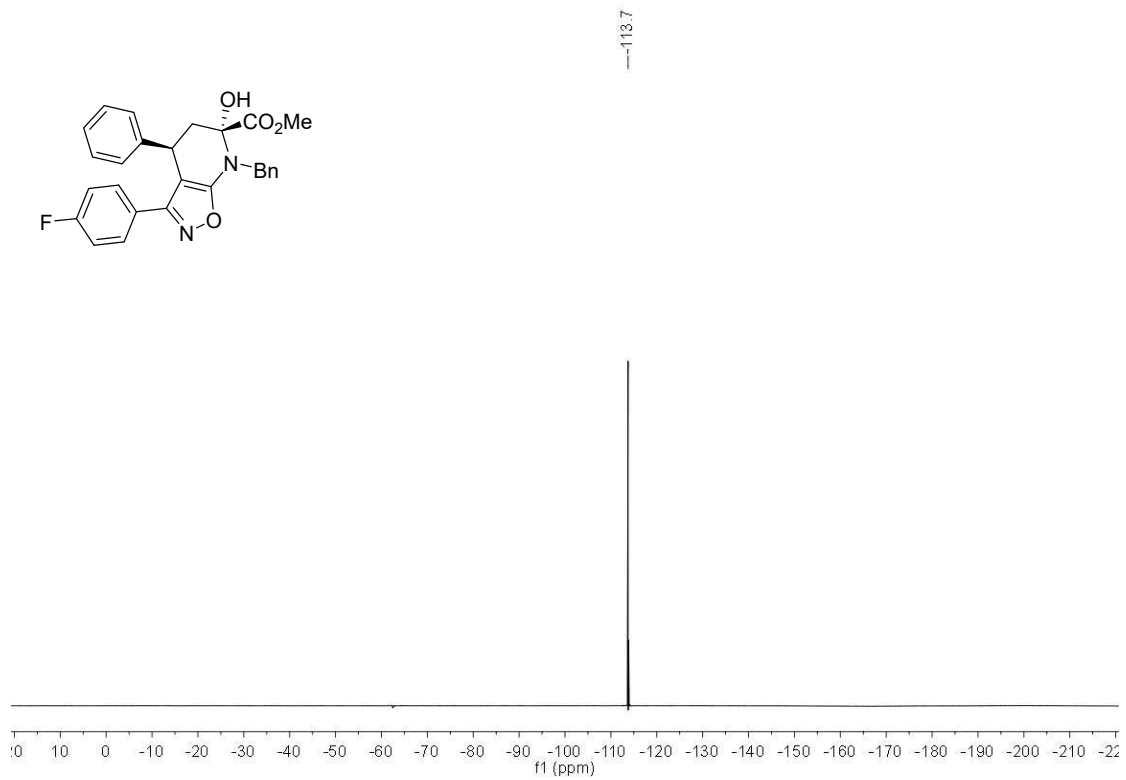

$^1\text{H}$  NMR and  $^{13}\text{C}$  NMR of 3s

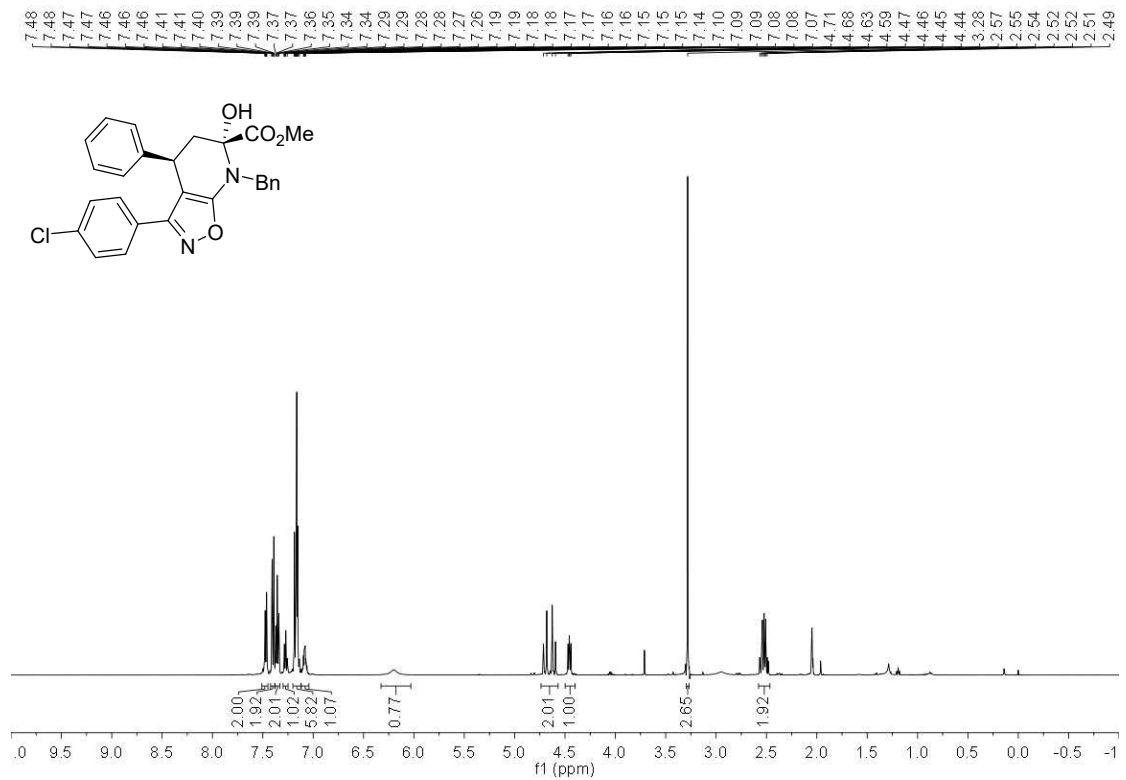



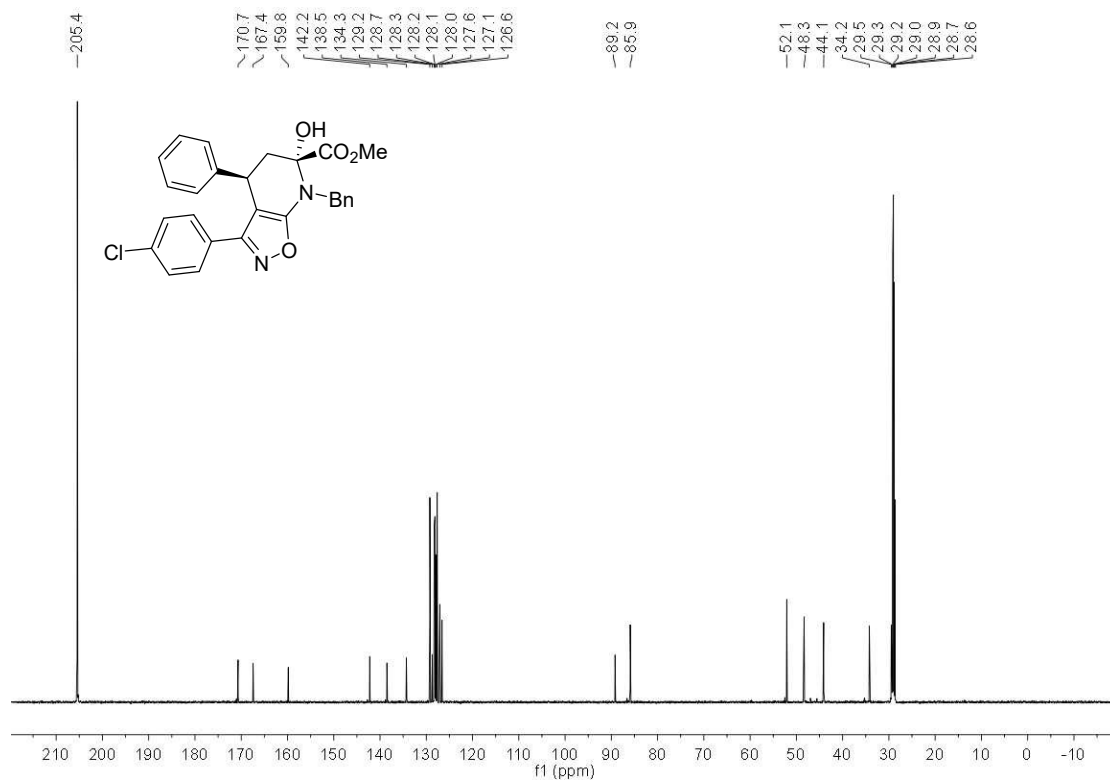

### <sup>1</sup>H NMR and <sup>13</sup>C NMR of 3t

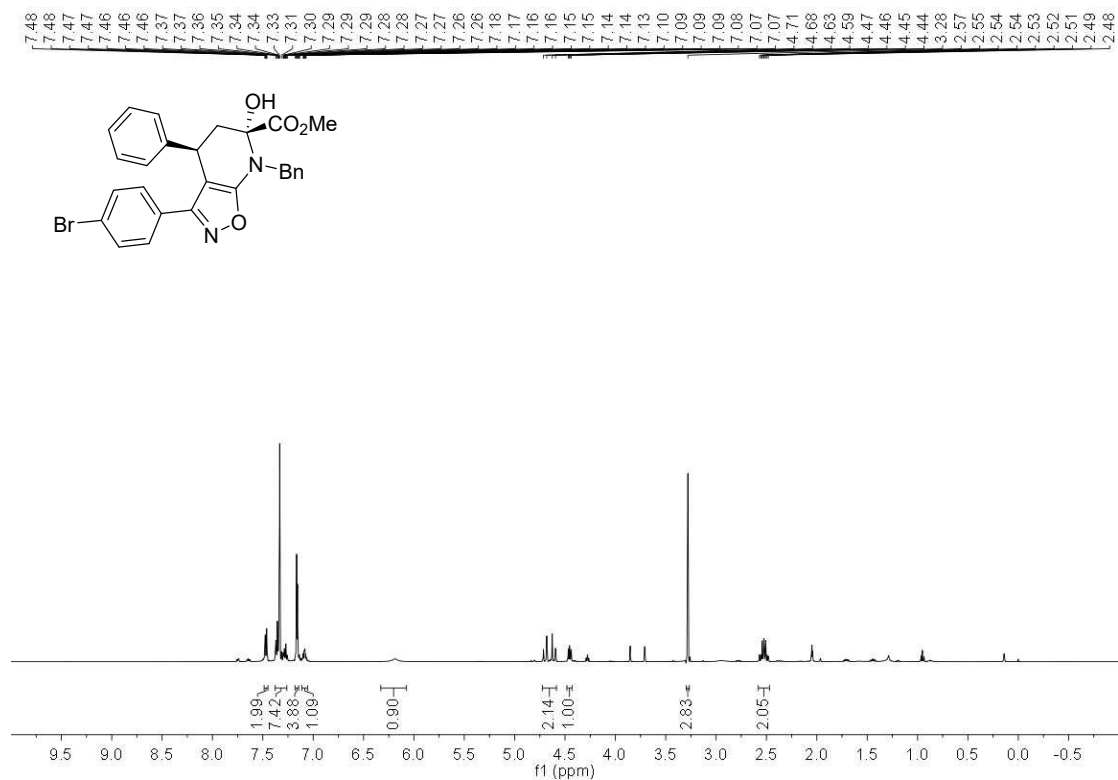

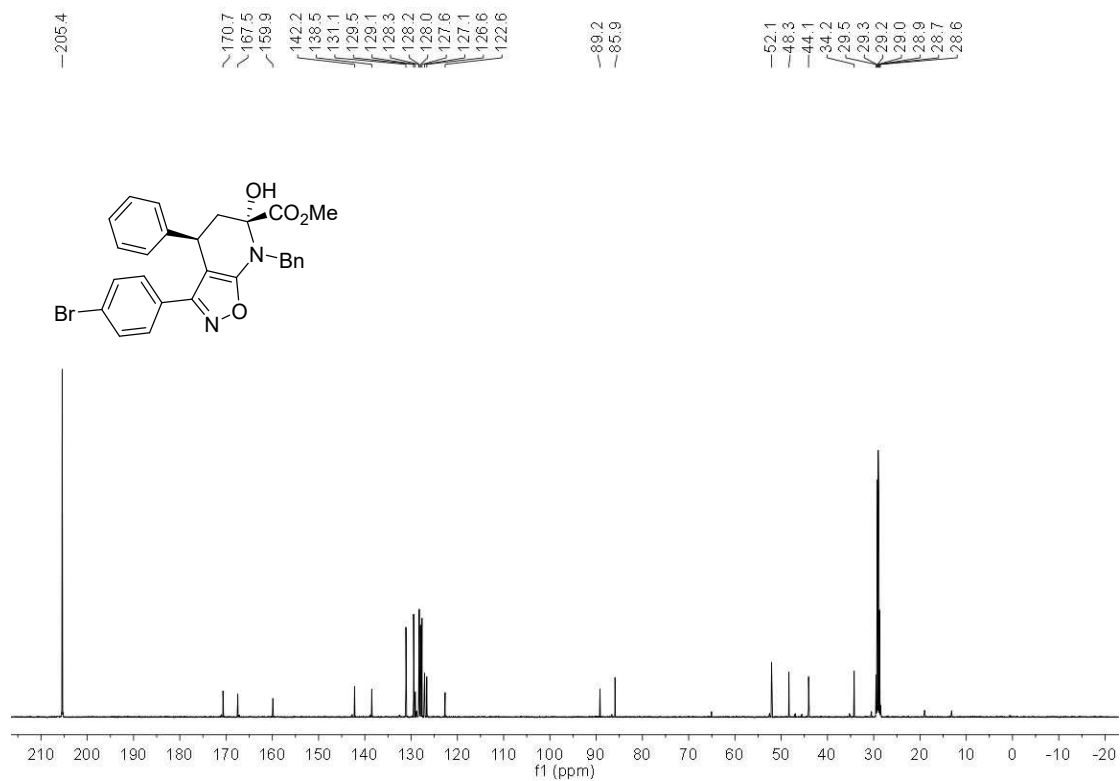

**<sup>1</sup>H NMR and <sup>13</sup>C NMR of 3u**

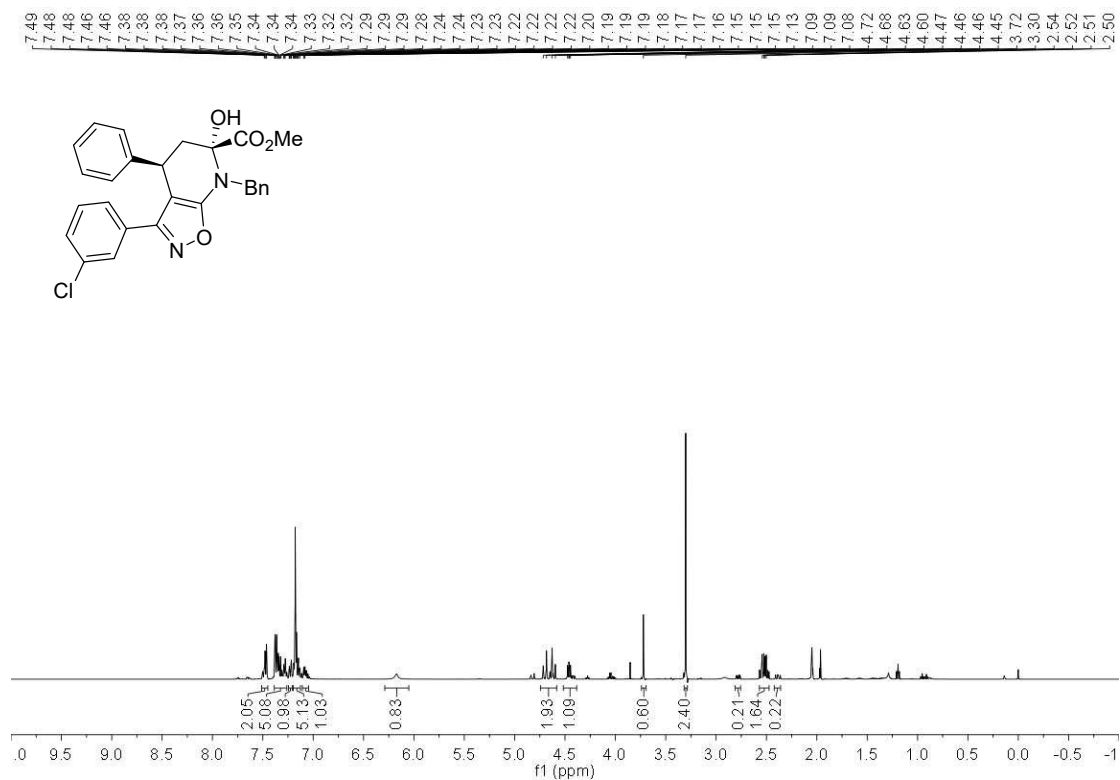

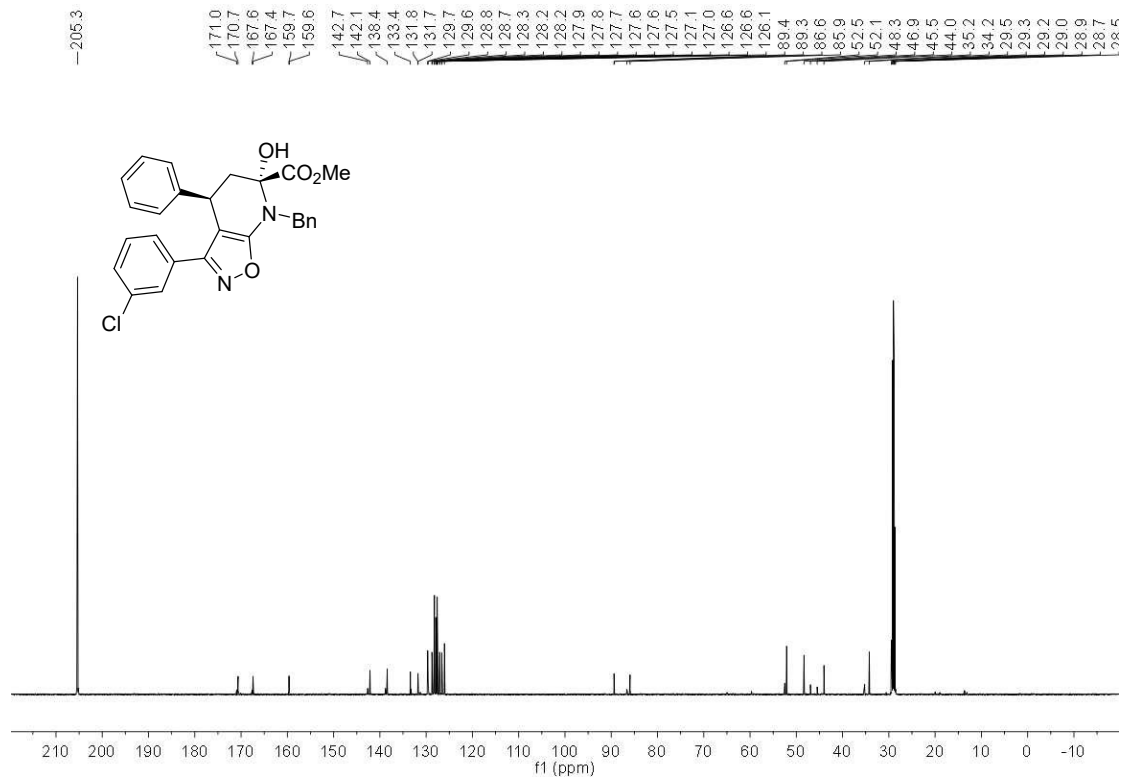

<sup>1</sup>H NMR and <sup>13</sup>C NMR of **3v**

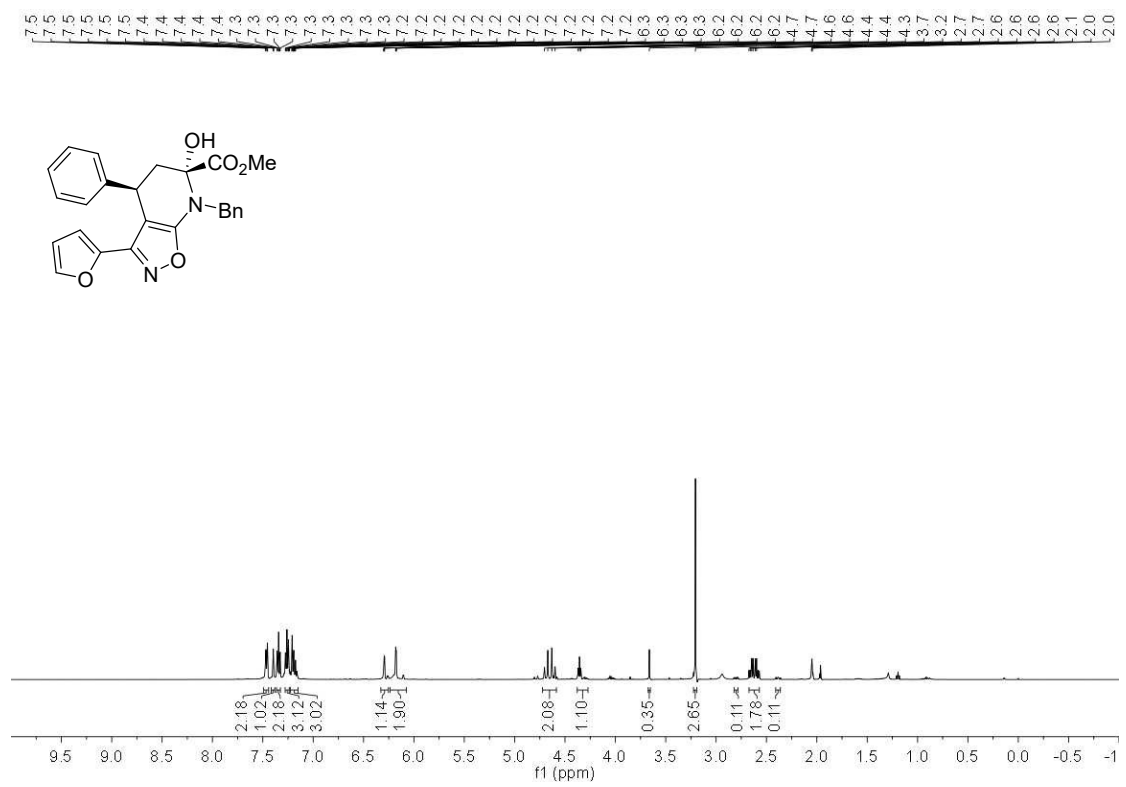

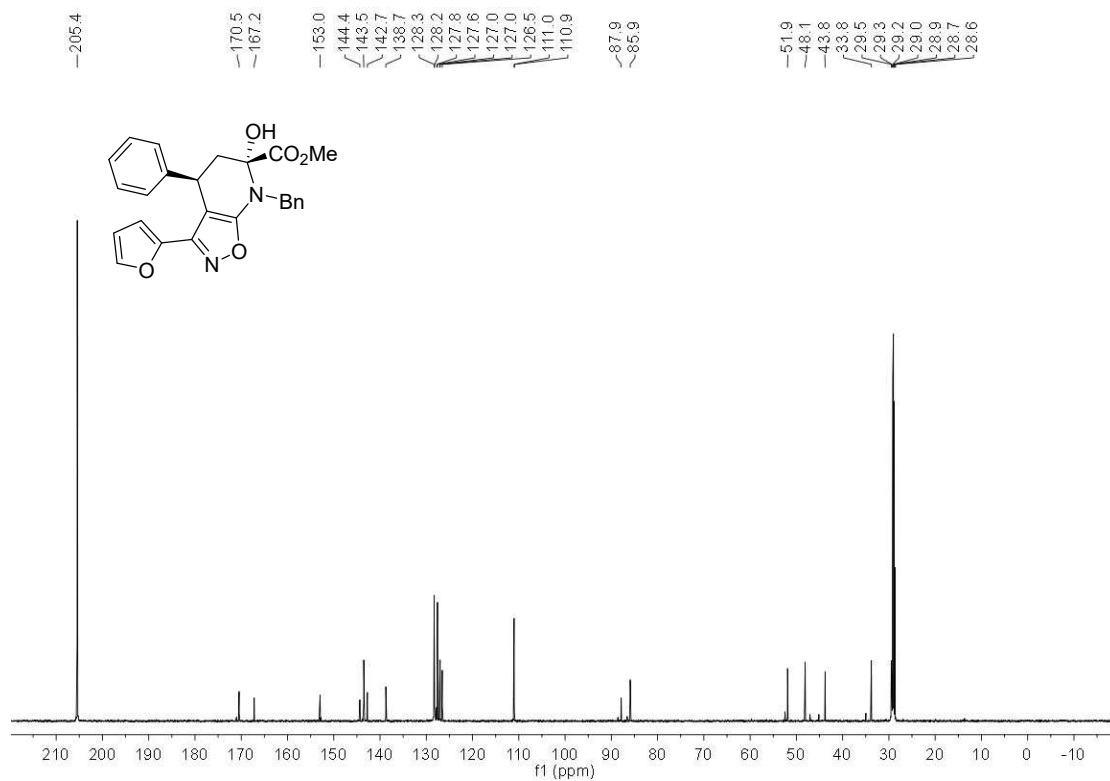

### <sup>1</sup>H NMR and <sup>13</sup>C NMR of **3w**

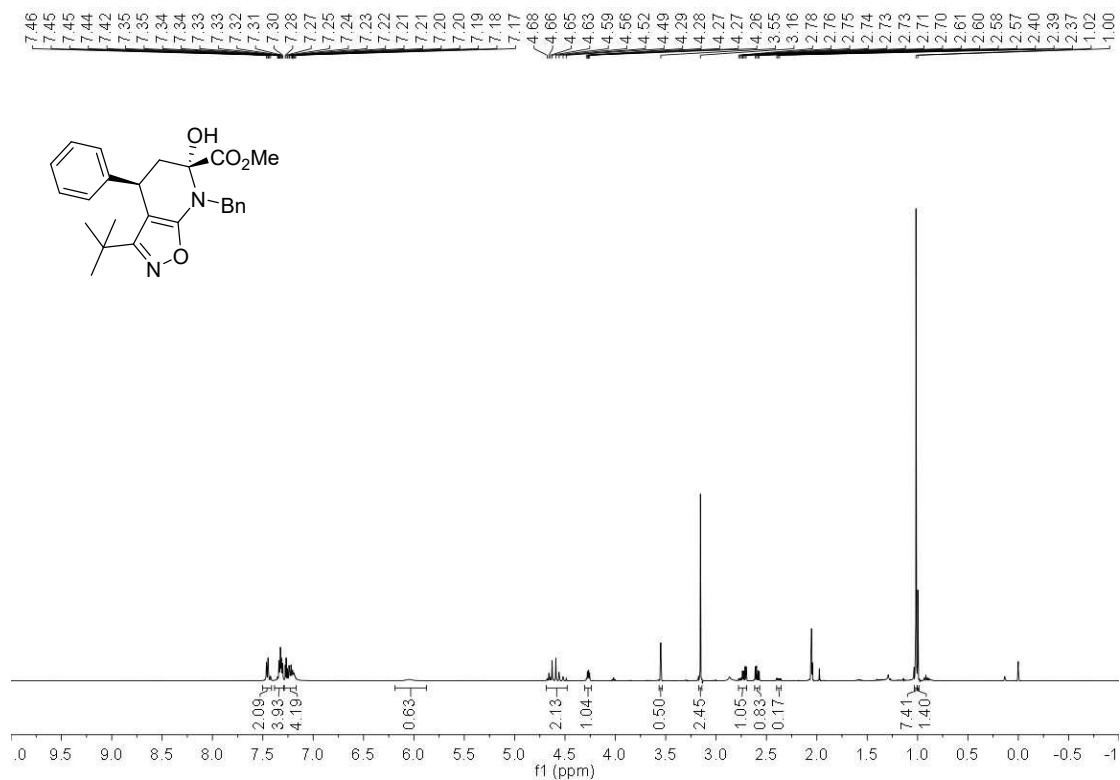

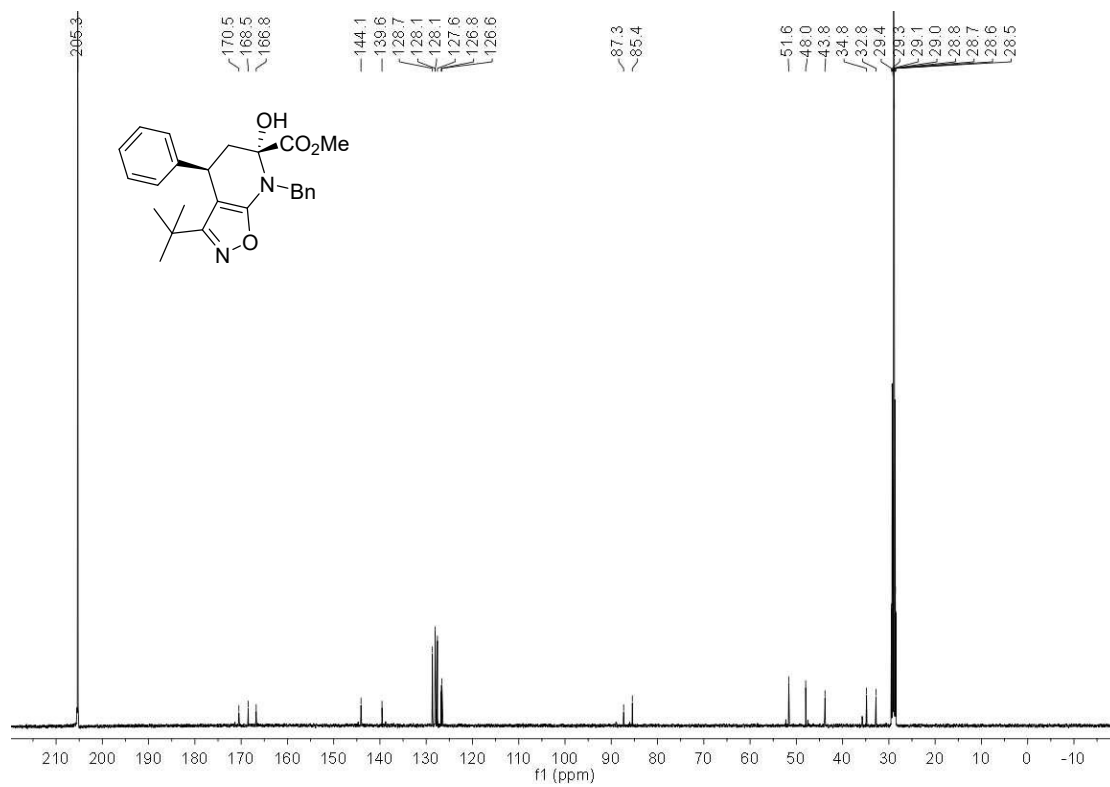

## Part III HPLC Spectra

### 3a racemic mixture:

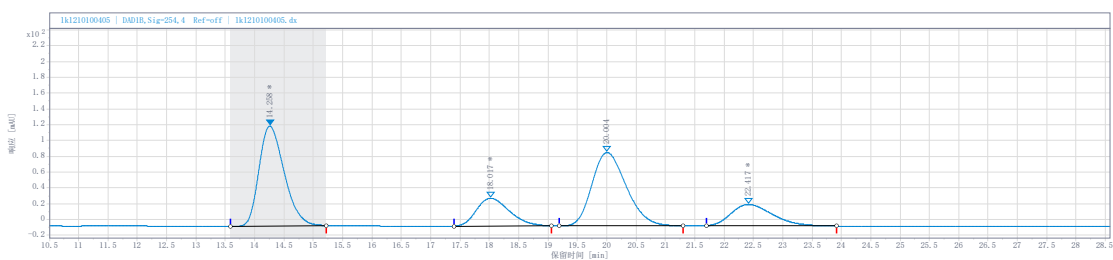

Signal: DAD1B, Sig=254,4 Ref=off

| RetTime [min] | width [min] | Arer [mAU*s] | Height [mAU] | Area% |
|---------------|-------------|--------------|--------------|-------|
| 14.3          | 1.63        | 3769.73      | 126.44       | 36.82 |
| 18.0          | 1.67        | 1359.23      | 35.15        | 13.27 |
| 20.0          | 2.12        | 3788.32      | 92.86        | 37.00 |
| 22.4          | 2.23        | 1322.12      | 27.05        | 12.91 |

### 3a

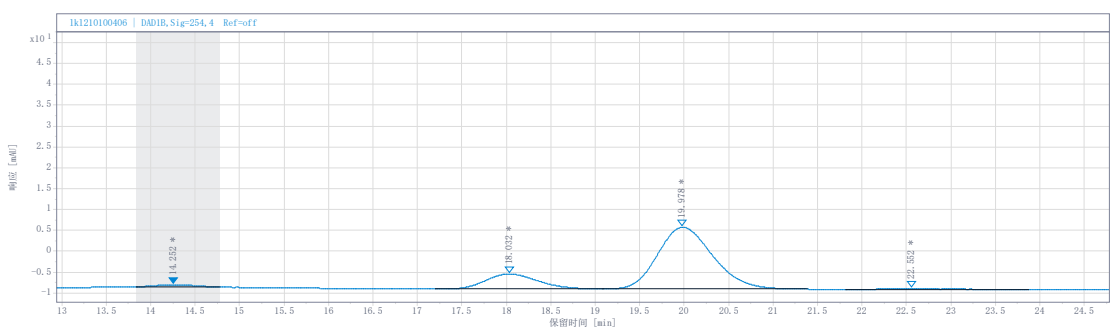

Signal: DAD1B, Sig=254,4 Ref=off

| RetTime [min] | width [min] | Arer [mAU*s] | Height [mAU] | Area% |
|---------------|-------------|--------------|--------------|-------|
| 14.3          | 0.93        | 15.29        | 0.52         | 1.90  |
| 18.0          | 1.87        | 146.95       | 3.59         | 18.28 |
| 20.0          | 2.30        | 637.71       | 14.79        | 79.31 |
| 22.6          | 2.05        | 4.09         | 0.09         | 0.51  |

### 3b racemic mixture:

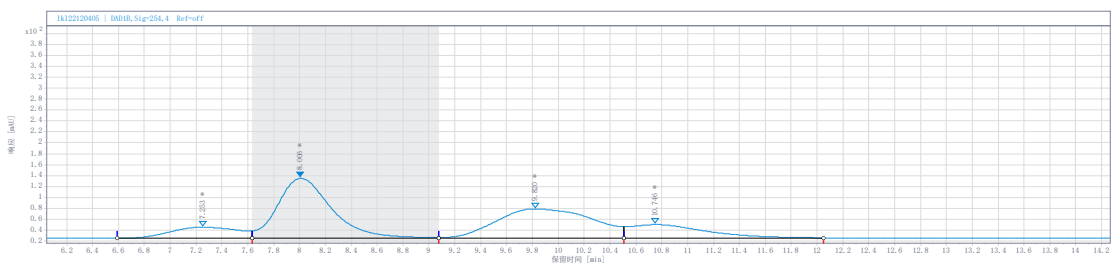

Signal: DAD1B, Sig=254, 4 Ref=off

| RetTime [min] | width [min] | Arer [MAU*s] | Height [MAU] | Area% |
|---------------|-------------|--------------|--------------|-------|
| 7.25          | 1.04        | 728.29       | 20.19        | 9.51  |
| 8.01          | 1.44        | 3178.80      | 109.66       | 41.49 |
| 9.82          | 1.43        | 2757.13      | 53.69        | 35.99 |
| 10.7          | 1.54        | 996.55       | 24.52        | 13.01 |

3b

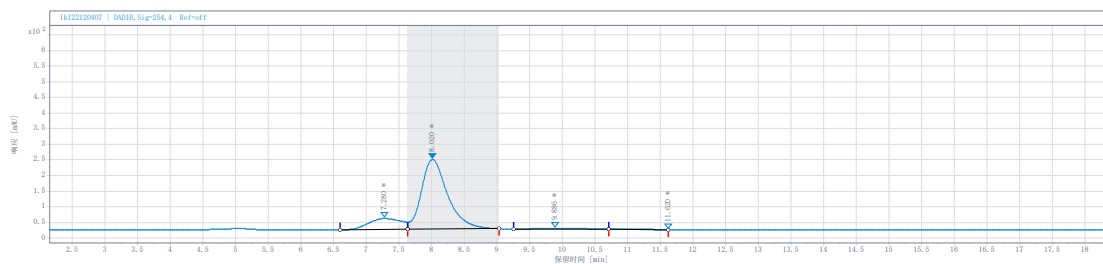

Signal: DAD1B, Sig=254, 4 Ref=off

| RetTime [min] | width [min] | Arer [MAU*s] | Height [MAU] | Area% |
|---------------|-------------|--------------|--------------|-------|
| 7.28          | 1.03        | 1207.75      | 34.99        | 15.99 |
| 8.02          | 1.39        | 6185.44      | 223.18       | 81.90 |
| 9.89          | 1.46        | 141.86       | 3.35         | 1.88  |
| 11.6          | 0.90        | 17.43        | 0.00         | 0.23  |

3c racemic mixture:

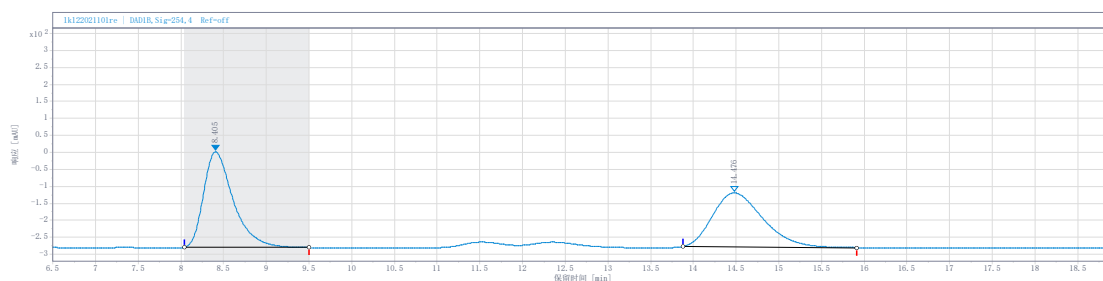

Signal: DAD1B, Sig=254, 4 Ref=off

| RetTime [min] | width [min] | Arer [MAU*s] | Height [MAU] | Area% |
|---------------|-------------|--------------|--------------|-------|
| 8.40          | 1.46        | 6785.08      | 281.27       | 51.18 |
| 14.5          | 2.03        | 6471.04      | 158.53       | 48.82 |

3c

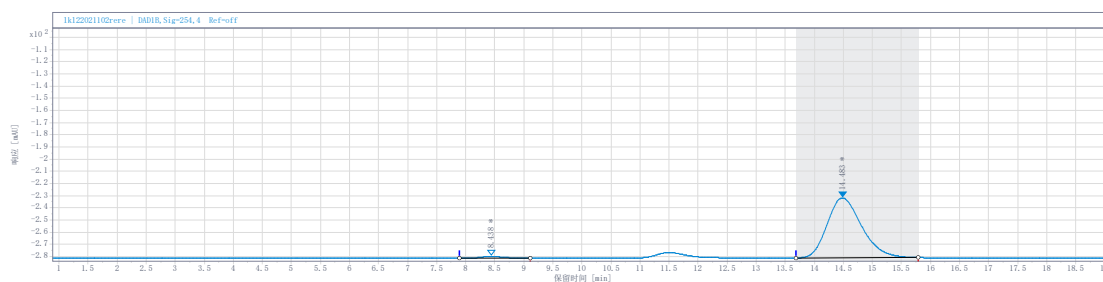

Signal: DAD1B, Sig=254, 4 Ref=off

| RetTime [min] | width [min] | Arer [mAU*s] | Height [mAU] | Area% |
|---------------|-------------|--------------|--------------|-------|
| 8.44          | 1.22        | 36.22        | 1.54         | 1.74  |
| 14.5          | 2.10        | 2042.33      | 49.25        | 98.26 |

### 3d racemic mixture:

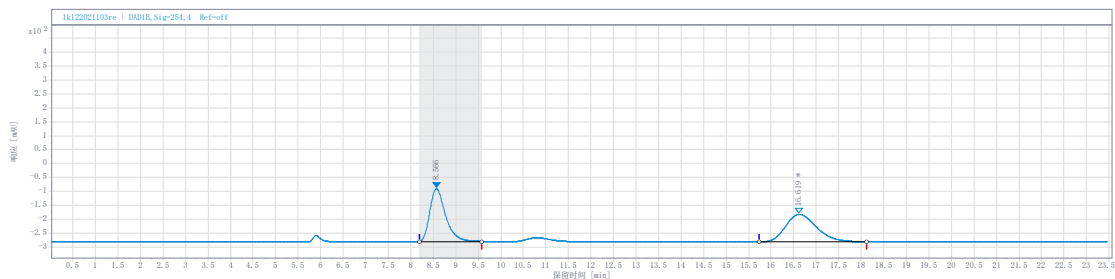

Signal: DAD1B, Sig=254, 4 Ref=off

| RetTime [min] | width [min] | Arer [mAU*s] | Height [mAU] | Area% |
|---------------|-------------|--------------|--------------|-------|
| 8.57          | 1.38        | 4562.50      | 189.28       | 49.11 |
| 16.6          | 2.38        | 4728.74      | 98.96        | 50.89 |

### 3d

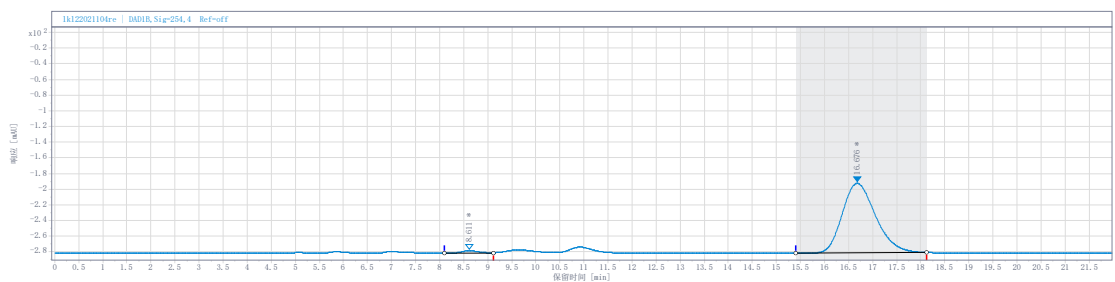

Signal: DAD1B, Sig=254, 4 Ref=off

| RetTime [min] | width [min] | Arer [mAU*s] | Height [mAU] | Area% |
|---------------|-------------|--------------|--------------|-------|
| 8.61          | 1.03        | 66.23        | 2.99         | 1.53  |
| 16.7          | 2.71        | 4271.59      | 88.79        | 98.47 |

### 3e racemic mixture:

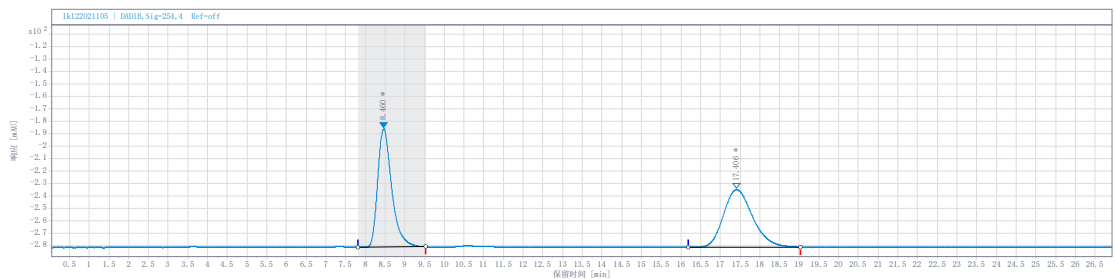



Signal: DAD1B, Sig=254, 4 Ref=off

| RetTime [min] | width [min] | Arer [mAU*s] | Height [mAU] | Area% |
|---------------|-------------|--------------|--------------|-------|
| 8.46          | 1.72        | 2340.84      | 95.22        | 49.70 |
| 17.4          | 2.85        | 2369.03      | 46.25        | 50.30 |

3e

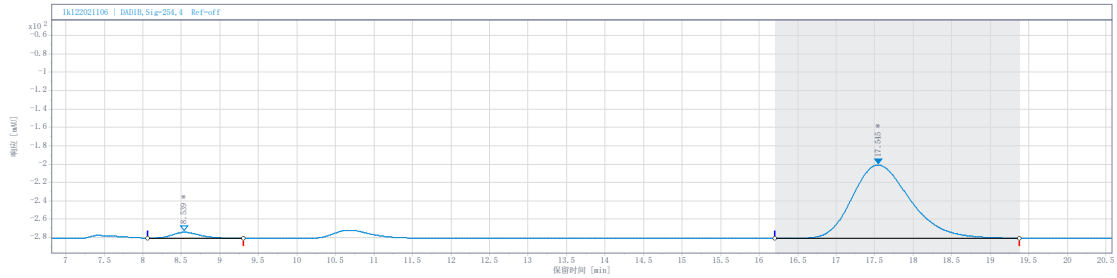

Signal: DAD1B, Sig=254, 4 Ref=off

| RetTime [min] | width [min] | Arer [mAU*s] | Height [mAU] | Area% |
|---------------|-------------|--------------|--------------|-------|
| 8.54          | 1.24        | 162.34       | 6.49         | 3.74  |
| 17.5          | 3.18        | 4174.34      | 79.91        | 96.26 |

3f racemic mixture:

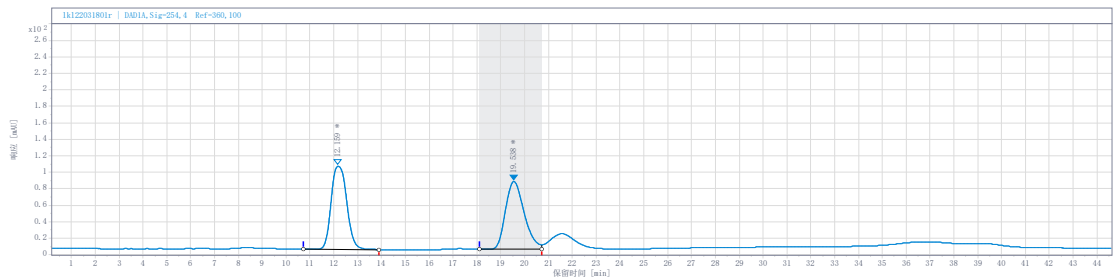

Signal: DAD1A, Sig=254, 4 Ref=360, 100

| RetTime [min] | width [min] | Arer [mAU*s] | Height [mAU] | Area% |
|---------------|-------------|--------------|--------------|-------|
| 12.2          | 3.18        | 4564.22      | 100.77       | 50.47 |
| 19.5          | 2.59        | 4479.65      | 82.15        | 49.53 |

3f

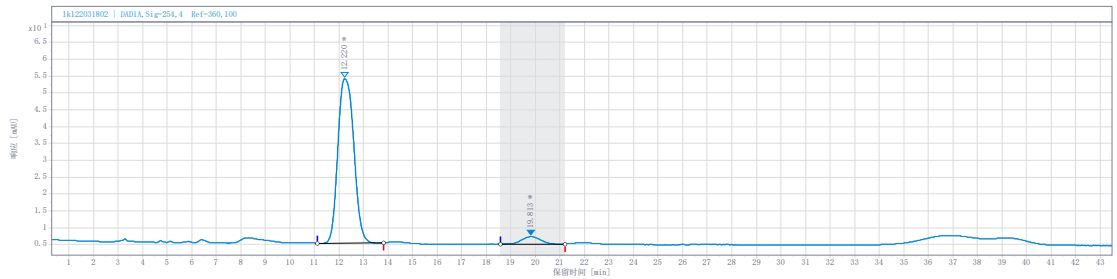

Signal: DAD1A, Sig=254, 4 Ref=360, 100

| RetTime [min] | width [min] | Arer [mAU*s] | Height [mAU] | Area% |
|---------------|-------------|--------------|--------------|-------|
| 12.2          | 2.70        | 2201.26      | 48.80        | 95.27 |
| 19.8          | 2.62        | 109.30       | 2.14         | 4.73  |

### 3g racemic mixture:

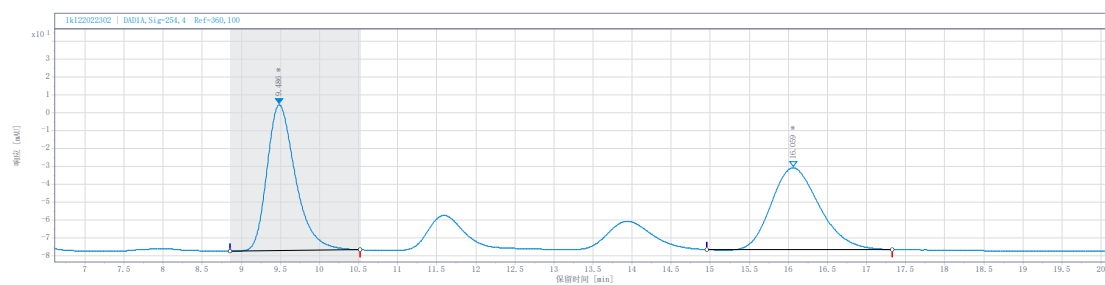

Signal: DAD1A, Sig=254, 4 Ref=360, 100

| RetTime [min] | width [min] | Area [mAU*s] | Height [mAU] | Area% |
|---------------|-------------|--------------|--------------|-------|
| 9.49          | 1.66        | 2067.65      | 81.63        | 51.44 |
| 16.1          | 2.37        | 1952.00      | 45.80        | 48.56 |

### 3g

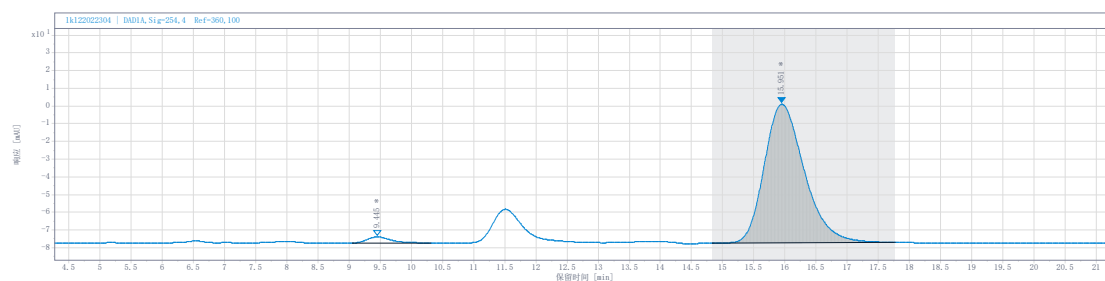

Signal: DAD1A, Sig=254, 4 Ref=360, 100

| RetTime [min] | width [min] | Area [mAU*s] | Height [mAU] | Area% |
|---------------|-------------|--------------|--------------|-------|
| 9.45          | 1.25        | 89.08        | 3.45         | 2.49  |
| 16.0          | 2.94        | 3492.77      | 78.27        | 97.51 |

### 3h racemic mixture:

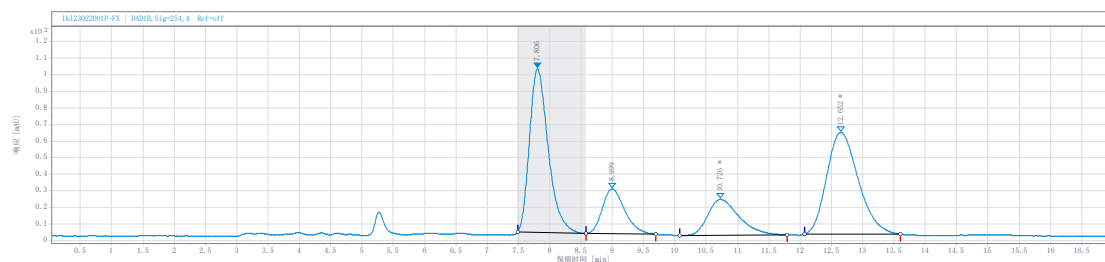

Signal: DAD1B, Sig=254, 4 Ref=off

| RetTime [min] | width [min] | Area [mAU*s] | Height [mAU] | Area% |
|---------------|-------------|--------------|--------------|-------|
| 7.81          | 1.09        | 2043.02      | 98.20        | 36.48 |
| 9.00          | 1.11        | 668.40       | 27.00        | 11.93 |
| 10.7          | 1.71        | 744.33       | 21.50        | 13.29 |
| 12.7          | 1.54        | 2144.88      | 61.27        | 38.30 |

### 3h

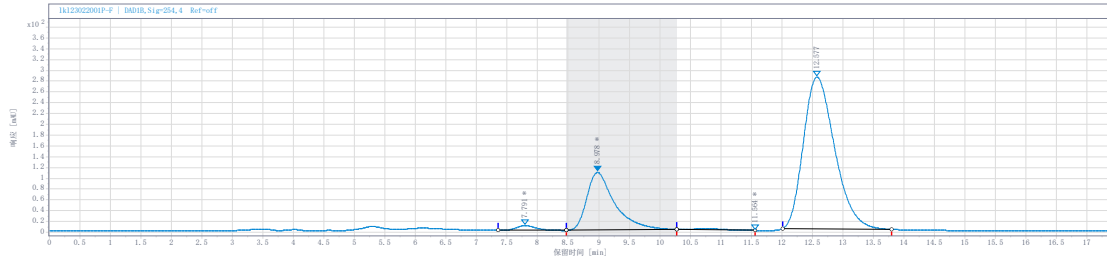

Signal: DAD1B, Sig=254, 4 Ref=off

| RetTime [min] | width [min] | Arer [mAU*s] | Height [mAU] | Area% |
|---------------|-------------|--------------|--------------|-------|
| 7.79          | 1.12        | 189.95       | 8.80         | 1.39  |
| 8.98          | 1.81        | 3375.89      | 106.87       | 24.72 |
| 11.6          | 1.29        | 59.19        | 0.00         | 0.43  |
| 12.6          | 1.79        | 10032.61     | 281.24       | 73.46 |

3i racemic mixture:

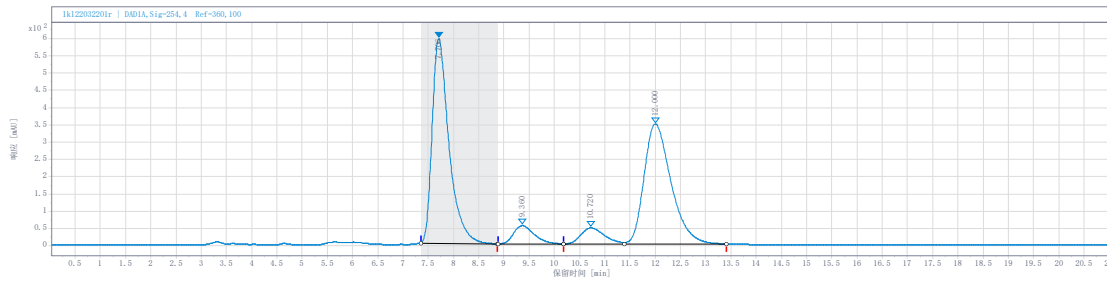

Signal: DAD1A, Sig=254, 4 Ref=360, 100

| RetTime [min] | width [min] | Arer [mAU*s] | Height [mAU] | Area% |
|---------------|-------------|--------------|--------------|-------|
| 7.71          | 1.51        | 13693.00     | 591.53       | 46.30 |
| 9.36          | 1.30        | 1498.37      | 52.70        | 5.07  |
| 10.7          | 1.20        | 1510.07      | 46.43        | 5.11  |
| 12.0          | 2.03        | 12874.78     | 347.14       | 43.53 |

3i

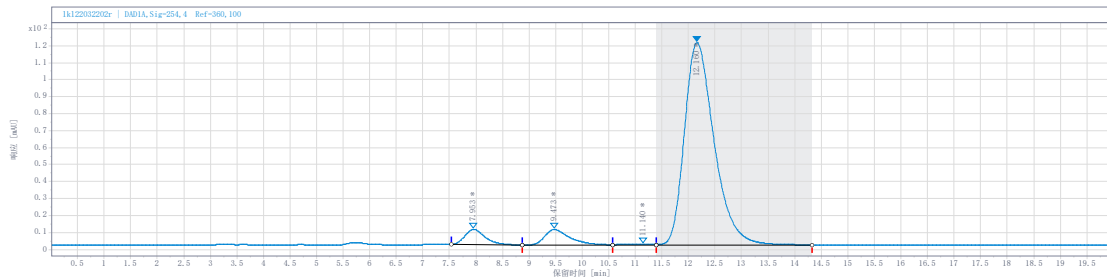

Signal: DAD1A, Sig=254, 4 Ref=360, 100

| RetTime [min] | width [min] | Arer [mAU*s] | Height [mAU] | Area% |
|---------------|-------------|--------------|--------------|-------|
| 7.95          | 1.34        | 239.80       | 9.04         | 4.64  |
| 9.47          | 1.70        | 295.03       | 9.10         | 5.71  |
| 11.1          | 0.83        | 15.43        | 0.49         | 0.30  |
| 12.2          | 2.92        | 4617.20      | 119.22       | 89.35 |

### 3j racemic mixture:

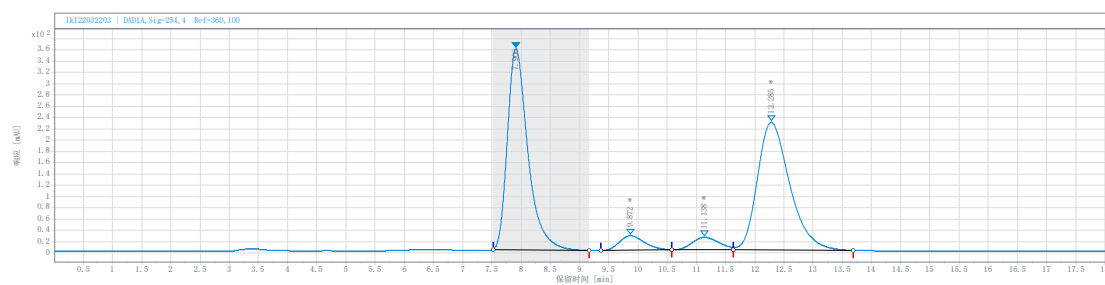

Signal: DAD1A, Sig=254, 4 Ref=360, 100

| RetTime [min] | width [min] | Arer [mAU*s] | Height [mAU] | Area% |
|---------------|-------------|--------------|--------------|-------|
| 7.91          | 1.65        | 8646.12      | 356.05       | 46.03 |
| 9.87          | 1.21        | 770.79       | 25.89        | 4.10  |
| 11.1          | 1.05        | 697.94       | 21.92        | 3.72  |
| 12.3          | 2.06        | 8670.44      | 226.03       | 46.16 |

### 3j

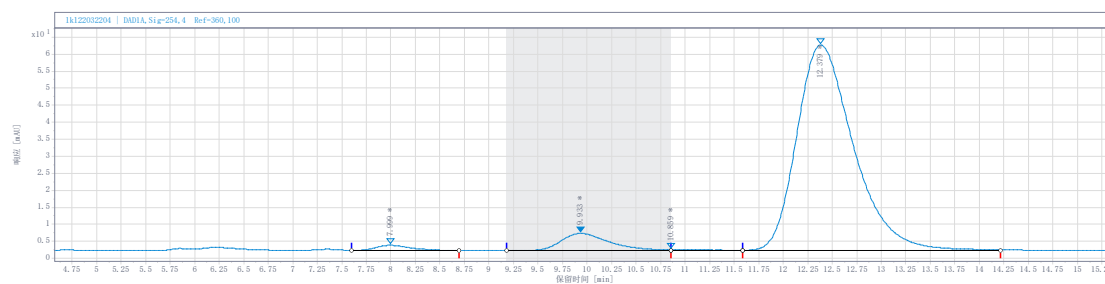

Signal: DAD1A, Sig=254, 4 Ref=360, 100

| RetTime [min] | width [min] | Arer [mAU*s] | Height [mAU] | Area% |
|---------------|-------------|--------------|--------------|-------|
| 8.00          | 1.10        | 36.12        | 1.49         | 1.37  |
| 9.93          | 1.68        | 170.79       | 5.02         | 6.49  |
| 10.9          | 0.73        | 5.08         | 0.18         | 0.19  |
| 12.4          | 2.63        | 2417.59      | 60.32        | 91.94 |

### 3k racemic mixture:

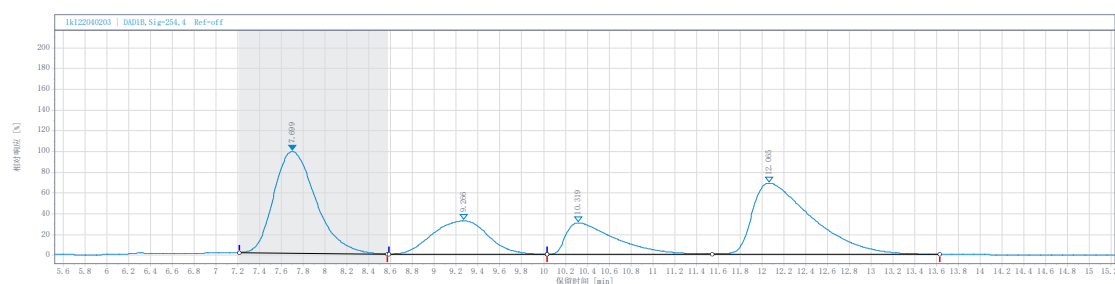

Signal: DAD1B, Sig=254, 4 Ref=off

| RetTime [min] | width [min] | Arer [mAU*s] | Height [mAU] | Area% |
|---------------|-------------|--------------|--------------|-------|
| 7.70          | 1.36        | 23653.86     | 886.73       | 35.75 |
| 9.27          | 1.45        | 10246.86     | 291.17       | 15.49 |
| 10.3          | 1.51        | 8726.17      | 275.90       | 13.19 |
| 12.1          | 2.08        | 23538.93     | 621.79       | 35.58 |

3k

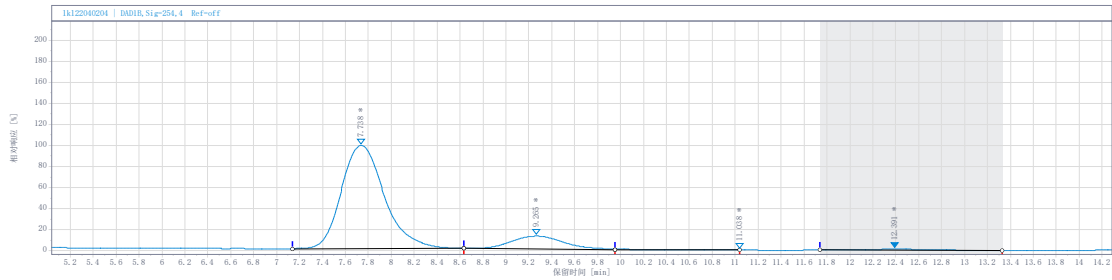

Signal: DAD1B, Sig=254, 4 Ref=off

| RetTime [min] | width [min] | Arer [mAU*s] | Height [mAU] | Area% |
|---------------|-------------|--------------|--------------|-------|
| 7.74          | 1.49        | 3122.02      | 120.00       | 85.92 |
| 9.26          | 1.32        | 466.38       | 14.89        | 12.84 |
| 11.0          | 1.08        | 4.58         | 0.00         | 0.13  |
| 12.4          | 1.59        | 40.53        | 1.14         | 1.12  |

3l racemic mixture:

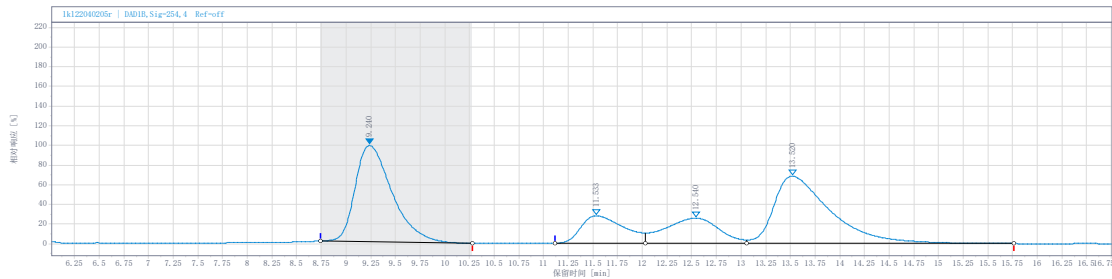

Signal: DAD1B, Sig=254, 4 Ref=off

| RetTime [min] | width [min] | Arer [mAU*s] | Height [mAU] | Area% |
|---------------|-------------|--------------|--------------|-------|
| 9.24          | 1.54        | 30030.26     | 1152.54      | 35.90 |
| 11.5          | 0.92        | 10060.49     | 329.44       | 12.03 |
| 12.5          | 1.03        | 11495.49     | 302.00       | 13.74 |
| 13.5          | 2.70        | 32055.35     | 805.30       | 38.32 |

3l

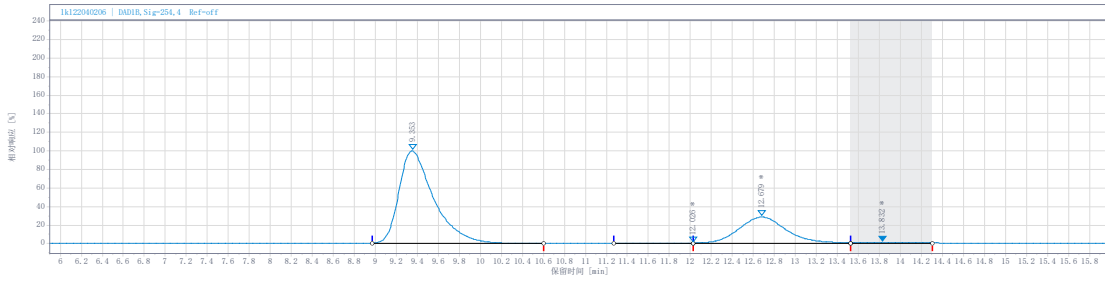

Signal: DAD1B, Sig=254, 4 Ref=off

| RetTime [min] | width [min] | Arer [mAU*s] | Height [mAU] | Area% |
|---------------|-------------|--------------|--------------|-------|
| 9.35          | 1.63        | 15353.29     | 667.80       | 69.99 |
| 12.0          | 0.76        | 47.75        | 3.29         | 0.22  |
| 12.7          | 1.50        | 6158.42      | 191.67       | 28.08 |
| 13.8          | 0.78        | 375.67       | 10.16        | 1.71  |

3m racemic mixture:

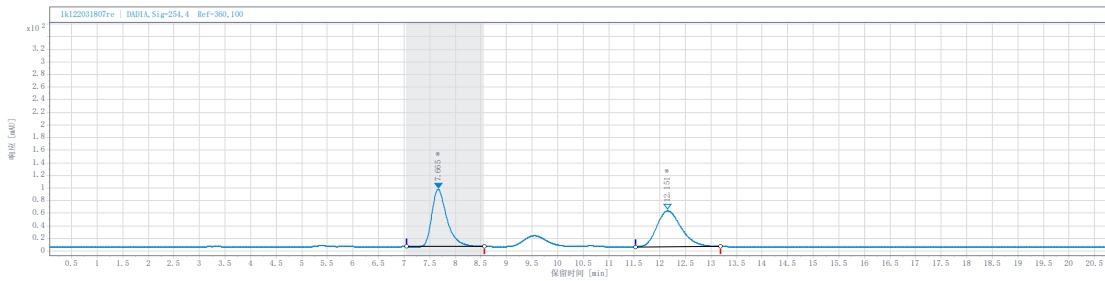

Signal: DAD1A, Sig=254, 4 Ref=360, 100

| RetTime [min] | width [min] | Arer [mAU*s] | Height [mAU] | Area% |
|---------------|-------------|--------------|--------------|-------|
| 7.67          | 1.52        | 1852.36      | 90.79        | 49.60 |
| 12.2          | 1.66        | 1882.23      | 56.82        | 50.40 |

3m

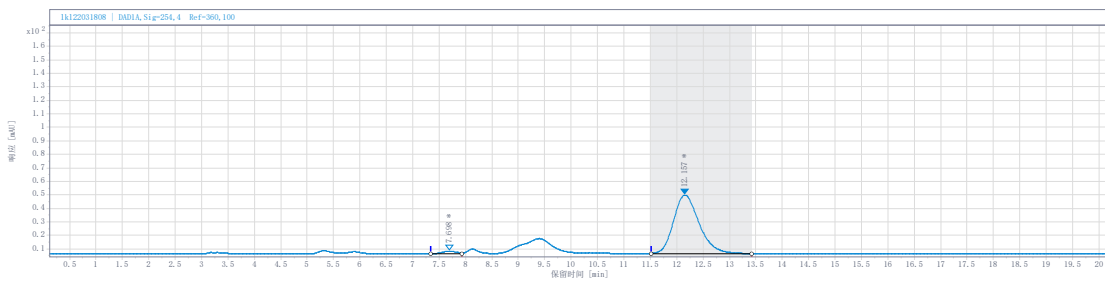

Signal: DAD1A, Sig=254, 4 Ref=360, 100

| RetTime [min] | width [min] | Arer [mAU*s] | Height [mAU] | Area% |
|---------------|-------------|--------------|--------------|-------|
| 7.70          | 0.59        | 36.23        | 1.93         | 2.43  |
| 12.2          | 1.90        | 1451.94      | 43.28        | 97.57 |

3n racemic mixture:

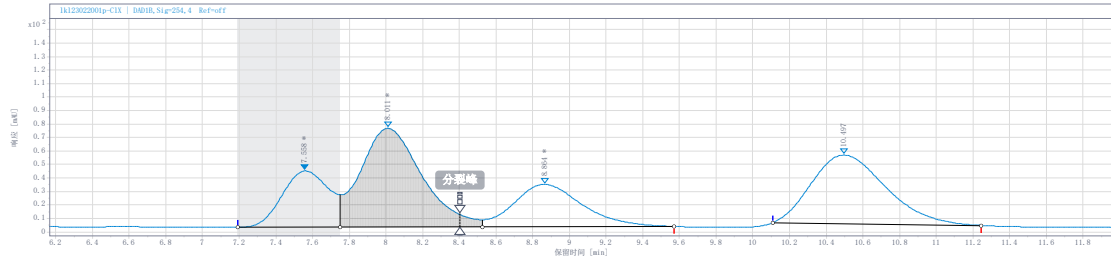

Signal: DAD1B, Sig=254, 4 Ref=off

| RetTime [min] | width [min] | Area [mAU*s] | Height [mAU] | Area% |
|---------------|-------------|--------------|--------------|-------|
| 7.56          | 0.56        | 739.68       | 41.71        | 15.79 |
| 8.01          | 0.77        | 1707.86      | 73.25        | 36.45 |
| 8.86          | 1.04        | 814.10       | 31.45        | 17.37 |
| 10.5          | 1.13        | 1423.98      | 50.78        | 30.39 |

3n

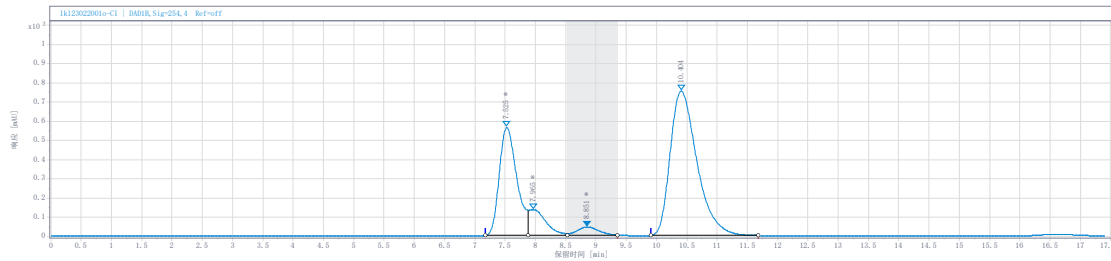

Signal: DAD1B, Sig=254, 4 Ref=off

| RetTime [min] | width [min] | Area [mAU*s] | Height [mAU] | Area% |
|---------------|-------------|--------------|--------------|-------|
| 7.53          | 0.71        | 11366.72     | 560.92       | 29.88 |
| 7.96          | 0.64        | 2563.18      | 133.03       | 6.74  |
| 8.85          | 0.83        | 1032.25      | 42.33        | 2.71  |
| 10.4          | 1.77        | 23078.40     | 751.06       | 60.67 |

3o racemic mixture:

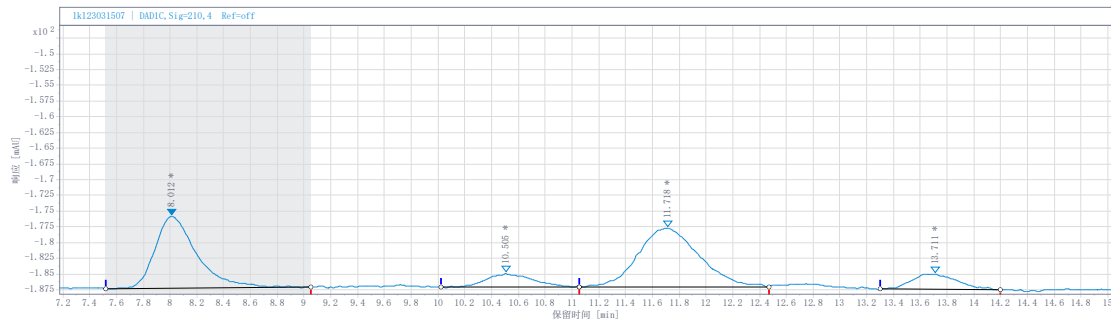

Signal: DAD1C, Sig=210, 4 Ref=off

| RetTime [min] | width [min] | Arer [mAU*s] | Height [mAU] | Area% |
|---------------|-------------|--------------|--------------|-------|
| 8.01          | 1.53        | 245.24       | 11.40        | 38.25 |
| 10.5          | 1.03        | 47.89        | 2.07         | 7.47  |
| 11.7          | 1.42        | 291.93       | 9.27         | 45.53 |
| 13.7          | 0.90        | 56.14        | 2.40         | 8.76  |

3o

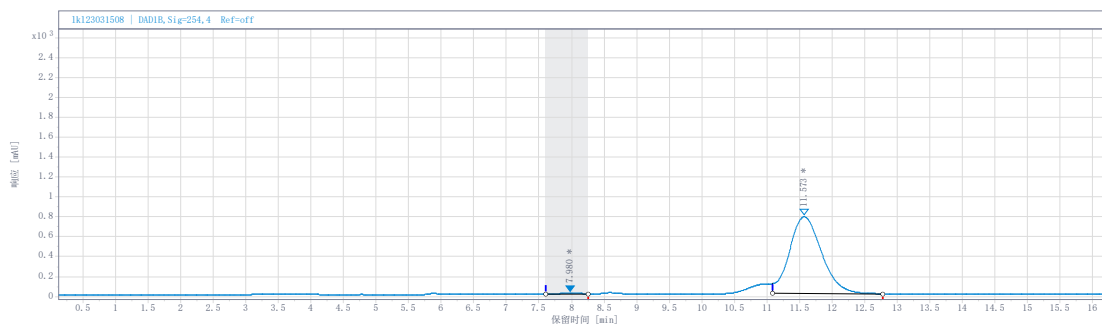

Signal: DAD1B, Sig=254, 4 Ref=off

| RetTime [min] | width [min] | Arer [mAU*s] | Height [mAU] | Area% |
|---------------|-------------|--------------|--------------|-------|
| 7.98          | 0.65        | 330.16       | 16.38        | 1.24  |
| 11.6          | 1.68        | 26330.13     | 769.10       | 98.76 |

3p racemic mixture:

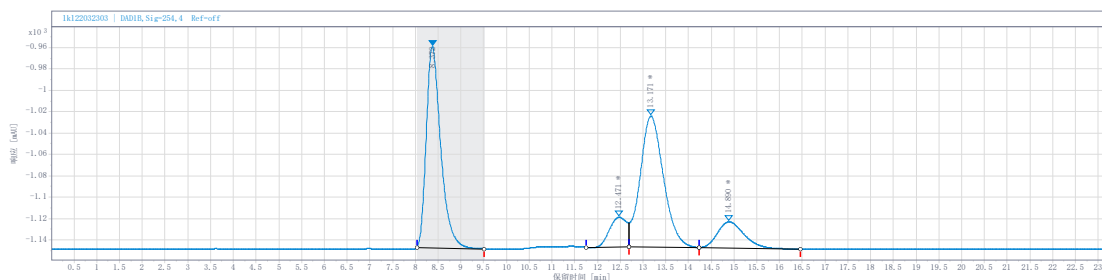

Signal: DAD1B, Sig=254, 4 Ref=off

| RetTime [min] | width [min] | Arer [mAU*s] | Height [mAU] | Area% |
|---------------|-------------|--------------|--------------|-------|
| 8.37          | 1.48        | 4148.22      | 188.17       | 40.59 |
| 12.5          | 0.94        | 715.43       | 27.66        | 7.00  |
| 13.2          | 1.55        | 4374.80      | 122.40       | 42.80 |
| 14.9          | 2.22        | 982.02       | 24.40        | 9.61  |

3p

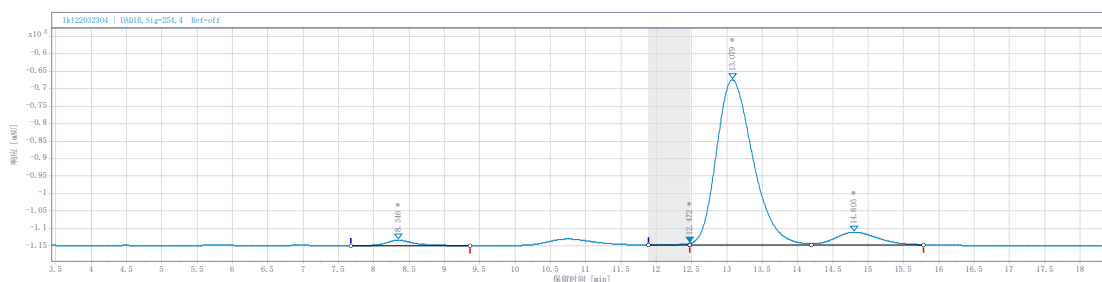



Signal: DAD1B, Sig=254, 4 Ref=off

| RetTime [min] | width [min] | Arer [mAU*s] | Height [mAU] | Area% |
|---------------|-------------|--------------|--------------|-------|
| 8.35          | 1.68        | 383.41       | 15.27        | 2.04  |
| 12.5          | 0.58        | 20.72        | 3.81         | 0.11  |
| 13.1          | 1.72        | 16871.65     | 472.28       | 89.90 |
| 14.8          | 1.59        | 1491.78      | 36.18        | 7.95  |

### 3q racemic mixture:

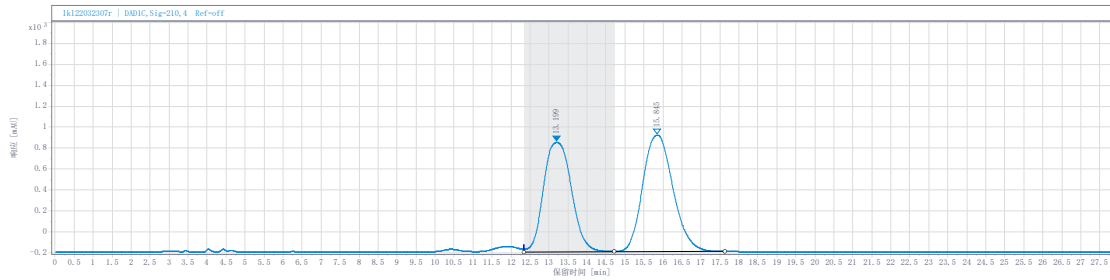

Signal: DAD1C, Sig=210, 4 Ref=off

| RetTime [min] | width [min] | Arer [mAU*s] | Height [mAU] | Area% |
|---------------|-------------|--------------|--------------|-------|
| 13.2          | 2.37        | 53252.84     | 1040.37      | 46.44 |
| 15.8          | 2.93        | 61415.27     | 1112.18      | 53.56 |

### 3q

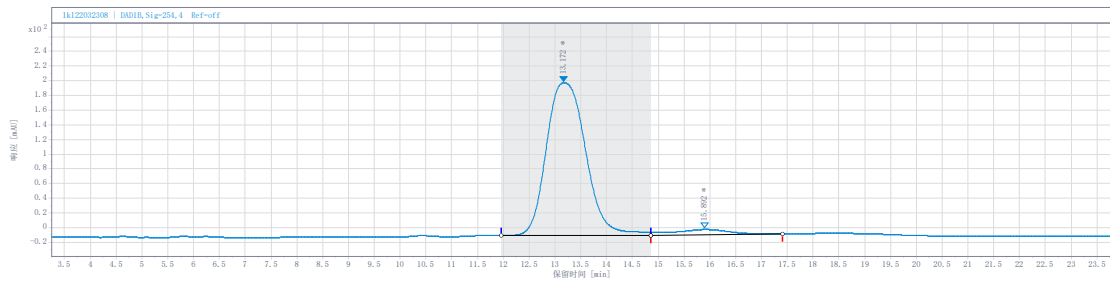

Signal: DAD1B, Sig=254, 4 Ref=off

| RetTime [min] | width [min] | Arer [mAU*s] | Height [mAU] | Area% |
|---------------|-------------|--------------|--------------|-------|
| 13.2          | 2.90        | 10982.99     | 207.98       | 95.28 |
| 15.9          | 2.55        | 543.88       | 7.12         | 4.72  |

### 3r racemic mixture:

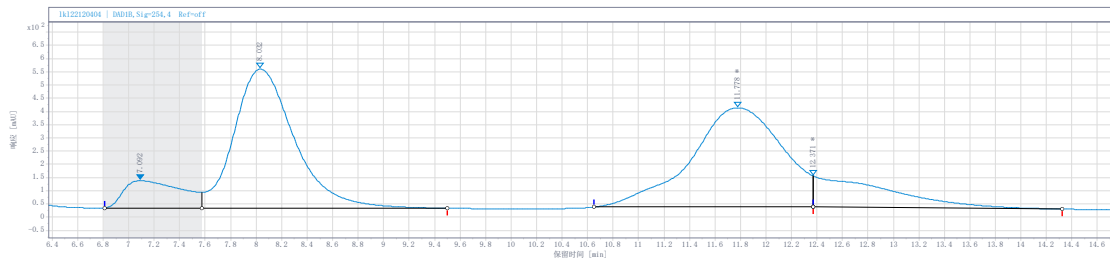

Signal: DAD1B, Sig=254, 4 Ref=off

| RetTime [min] | width [min] | Arer [mAU*s] | Height [mAU] | Area% |
|---------------|-------------|--------------|--------------|-------|
| 7.09          | 0.76        | 3255.45      | 102.80       | 7.42  |
| 8.03          | 1.93        | 17271.63     | 525.82       | 39.37 |
| 11.8          | 1.72        | 18584.56     | 374.04       | 42.37 |
| 12.4          | 1.96        | 4753.80      | 115.56       | 10.84 |

3r

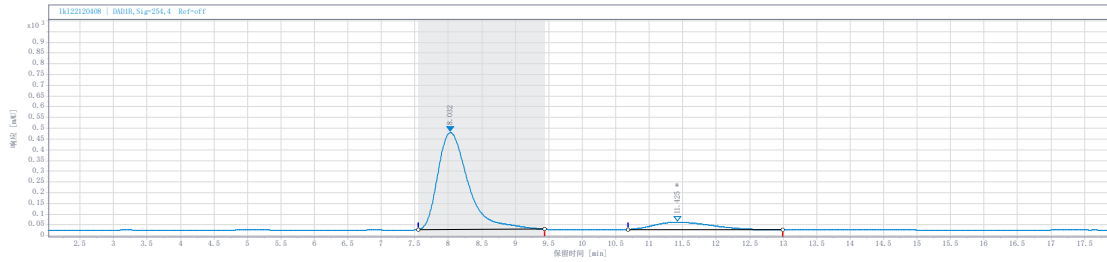

Signal: DAD1B, Sig=254, 4 Ref=off

| RetTime [min] | width [min] | Arer [mAU*s] | Height [mAU] | Area% |
|---------------|-------------|--------------|--------------|-------|
| 8.03          | 1.89        | 14250.66     | 450.35       | 87.56 |
| 11.4          | 2.31        | 2024.81      | 33.96        | 12.44 |

3s racemic mixture:

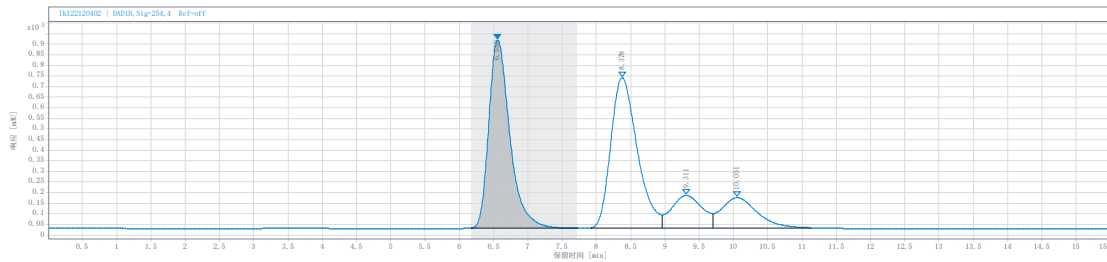

Signal: DAD1B, Sig=254, 4 Ref=off

| RetTime [min] | width [min] | Arer [mAU*s] | Height [mAU] | Area% |
|---------------|-------------|--------------|--------------|-------|
| 6.56          | 1.54        | 18863.27     | 887.30       | 39.45 |
| 8.38          | 1.05        | 19010.20     | 708.20       | 39.76 |
| 9.31          | 0.73        | 4775.13      | 152.50       | 9.99  |
| 10.1          | 1.43        | 5167.71      | 142.21       | 10.81 |

3s

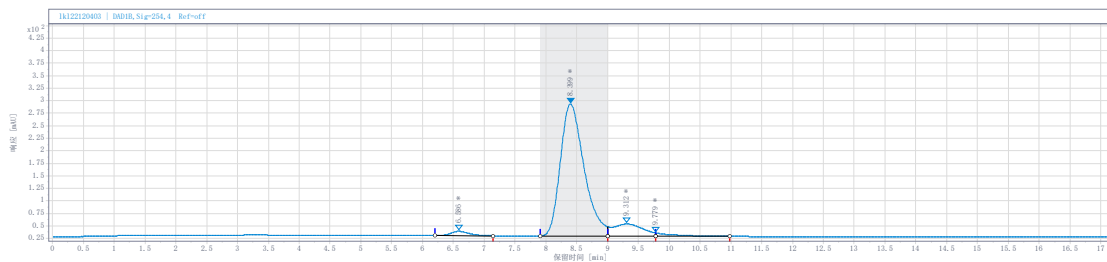

Signal: DAD1B, Sig=254, 4 Ref=off

| RetTime [min] | width [min] | Arer [mAU*s] | Height [mAU] | Area% |
|---------------|-------------|--------------|--------------|-------|
| 6.59          | 0.94        | 157.94       | 8.24         | 1.93  |
| 8.40          | 1.09        | 7059.59      | 263.94       | 86.26 |
| 9.31          | 0.78        | 839.78       | 24.49        | 10.26 |
| 9.78          | 1.20        | 126.46       | 6.64         | 1.55  |

3t racemic mixture:

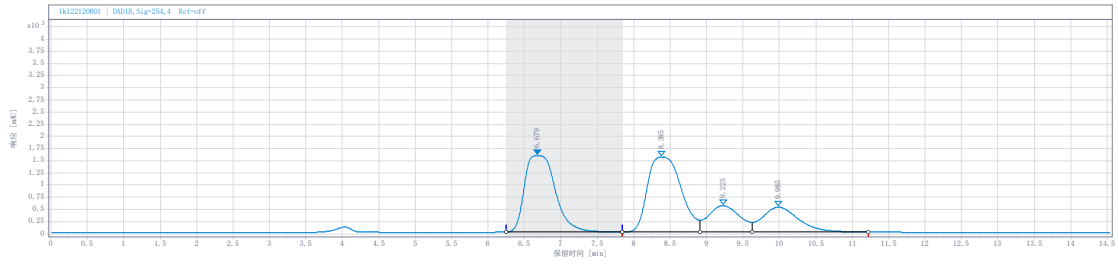

Signal: DAD1B, Sig=254, 4 Ref=off

| RetTime [min] | width [min] | Arer [mAU*s] | Height [mAU] | Area% |
|---------------|-------------|--------------|--------------|-------|
| 6.68          | 1.59        | 45985.39     | 1573.76      | 35.47 |
| 8.39          | 1.07        | 49651.47     | 1544.82      | 38.30 |
| 9.23          | 0.71        | 16338.79     | 545.20       | 12.60 |
| 9.98          | 1.59        | 17674.72     | 511.92       | 13.63 |

3t

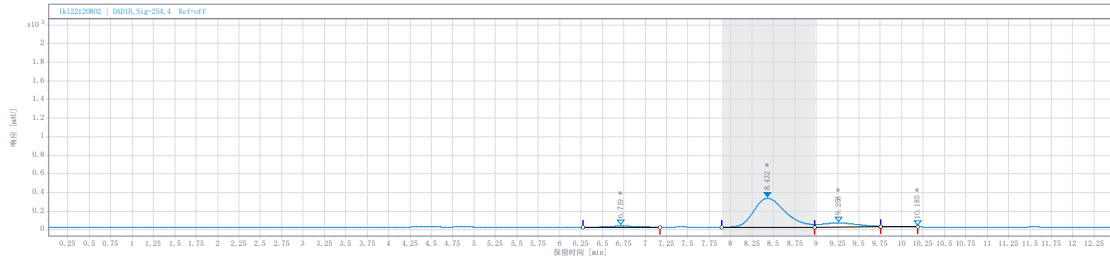

Signal: DAD1B, Sig=254, 4 Ref=off

| RetTime [min] | width [min] | Arer [mAU*s] | Height [mAU] | Area% |
|---------------|-------------|--------------|--------------|-------|
| 6.72          | 0.89        | 208.40       | 10.76        | 2.21  |
| 8.43          | 1.09        | 7999.87      | 311.20       | 84.72 |
| 9.26          | 0.77        | 1211.32      | 42.20        | 12.83 |
| 10.2          | 0.43        | 23.47        | 0.01         | 0.25  |

3u racemic mixture:

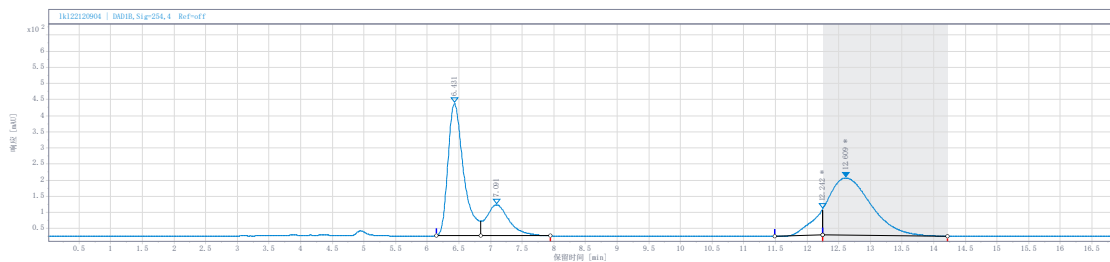

Signal: DAD1B, Sig=254, 4 Ref=off

| RetTime [min] | width [min] | Arer [mAU*s] | Height [mAU] | Area% |
|---------------|-------------|--------------|--------------|-------|
| 6.43          | 0.70        | 7013.79      | 408.34       | 38.25 |
| 7.09          | 1.10        | 2375.80      | 95.77        | 12.96 |
| 12.2          | 0.75        | 960.92       | 77.28        | 5.24  |
| 12.6          | 1.98        | 7986.09      | 176.05       | 43.55 |

3u

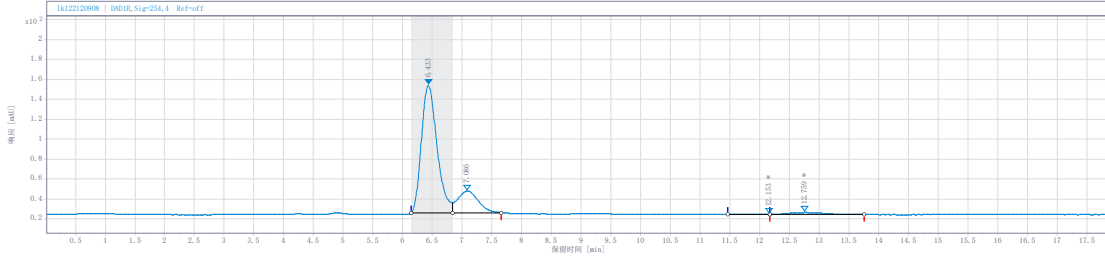

Signal: DAD1B, Sig=254, 4 Ref=off

| RetTime [min] | width [min] | Arer [mAU*s] | Height [mAU] | Area% |
|---------------|-------------|--------------|--------------|-------|
| 6.43          | 0.69        | 2337.77      | 127.86       | 79.01 |
| 7.09          | 0.83        | 526.58       | 21.88        | 17.80 |
| 12.2          | 0.71        | 1.08         | 0.18         | 0.04  |
| 12.8          | 1.58        | 93.30        | 2.19         | 3.15  |

3v racemic mixture:

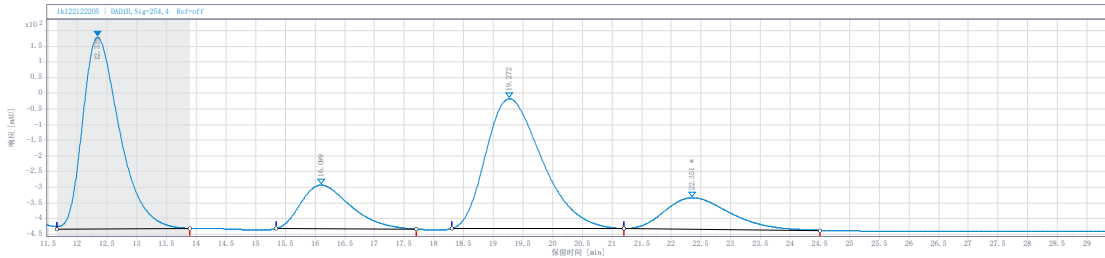

Signal: DAD1B, Sig=254, 4 Ref=off

| RetTime [min] | width [min] | Arer [mAU*s] | Height [mAU] | Area% |
|---------------|-------------|--------------|--------------|-------|
| 12.3          | 2.23        | 26251.32     | 611.50       | 38.01 |
| 16.1          | 2.36        | 8070.48      | 139.37       | 11.69 |
| 19.3          | 2.91        | 27160.38     | 415.10       | 39.33 |
| 22.4          | 3.29        | 7573.87      | 100.57       | 10.97 |

3v

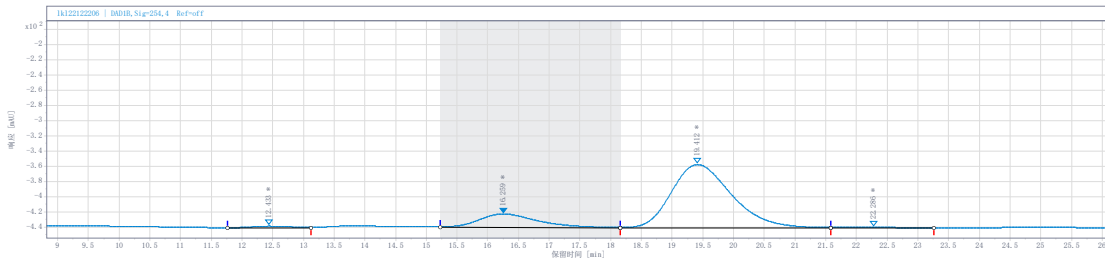

Signal: DAD1B, Sig=254, 4 Ref=off

| RetTime [min] | width [min] | Arer [mAU*s] | Height [mAU] | Area% |
|---------------|-------------|--------------|--------------|-------|
| 12.4          | 1.35        | 90.57        | 2.13         | 1.30  |
| 16.3          | 2.93        | 1207.90      | 17.93        | 17.38 |
| 19.4          | 3.43        | 5605.39      | 83.05        | 80.65 |
| 22.3          | 1.68        | 46.52        | 0.90         | 0.67  |

3w racemic mixture:

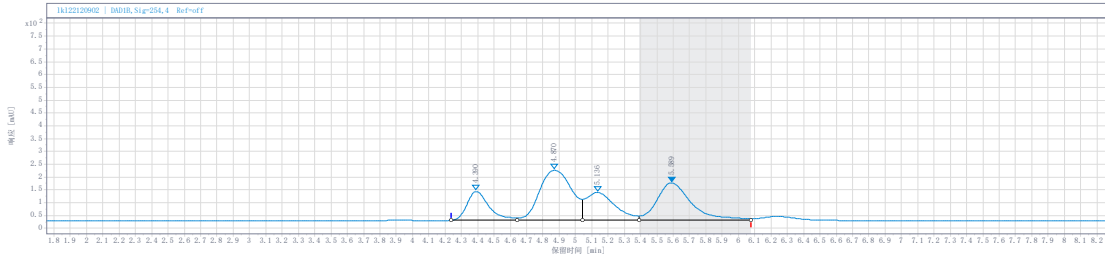

Signal: DAD1B, Sig=254, 4 Ref=off

| RetTime [min] | width [min] | Arer [mAU*s] | Height [mAU] | Area% |
|---------------|-------------|--------------|--------------|-------|
| 4.39          | 0.41        | 1056.67      | 112.58       | 14.58 |
| 4.87          | 0.40        | 2684.27      | 194.79       | 37.04 |
| 5.14          | 0.35        | 1360.42      | 108.38       | 18.77 |
| 5.59          | 0.69        | 2145.81      | 146.15       | 29.61 |

3w

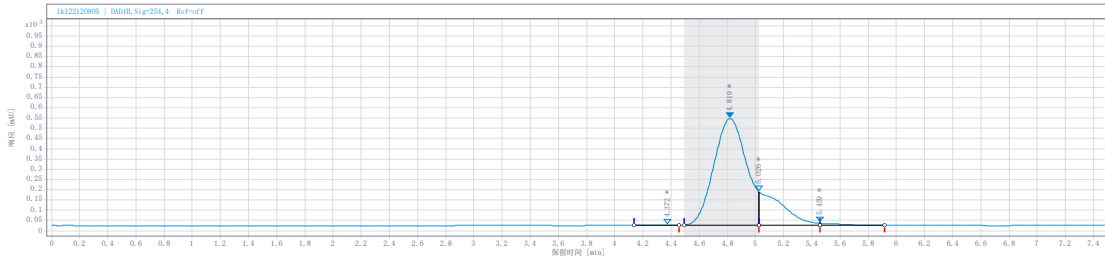

Signal: DAD1B, Sig=254, 4 Ref=off

| RetTime [min] | width [min] | Arer [mAU*s] | Height [mAU] | Area% |
|---------------|-------------|--------------|--------------|-------|
| 4.37          | 0.32        | 15.45        | 1.23         | 0.15  |
| 4.82          | 0.53        | 8307.80      | 520.11       | 80.48 |
| 5.03          | 0.43        | 1918.13      | 160.71       | 18.58 |
| 5.46          | 0.46        | 81.46        | 8.30         | 0.79  |

## Part IV Crystal data

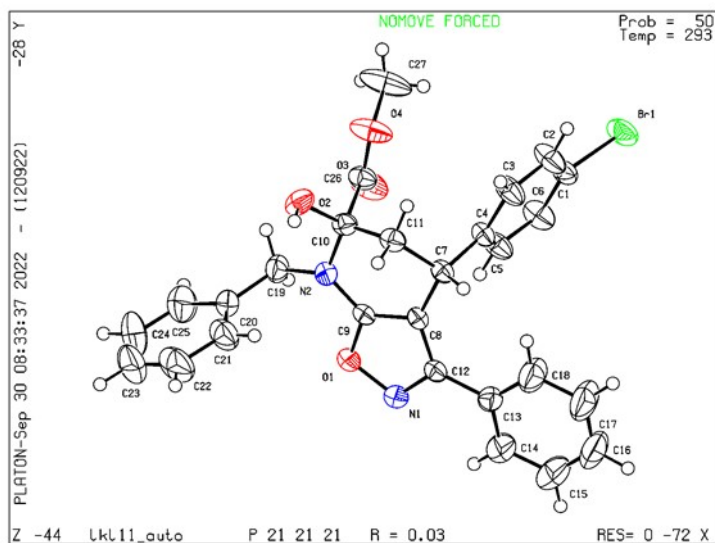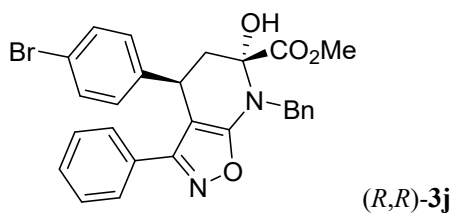

**CCDC- 2247659**

|                                    |                                                                 |                                                                 |              |
|------------------------------------|-----------------------------------------------------------------|-----------------------------------------------------------------|--------------|
| Bond precision:                    | C-C = 0.0059 Å                                                  | Wavelength=1.54184                                              |              |
| Cell:                              | a=10.19020(11)                                                  | b=11.29931(13)                                                  | c=21.3624(3) |
|                                    | alpha=90                                                        | beta=90                                                         | gamma=90     |
| Temperature:                       | 293 K                                                           |                                                                 |              |
|                                    | Calculated                                                      | Reported                                                        |              |
| Volume                             | 2459.71(5)                                                      | 2459.72(5)                                                      |              |
| Space group                        | P 21 21 21                                                      | P 21 21 21                                                      |              |
| Hall group                         | P 2ac 2ab                                                       | P 2ac 2ab                                                       |              |
| Moiety formula                     | C <sub>27</sub> H <sub>23</sub> BrN <sub>2</sub> O <sub>4</sub> | C <sub>27</sub> H <sub>23</sub> BrN <sub>2</sub> O <sub>4</sub> |              |
| Sum formula                        | C <sub>27</sub> H <sub>23</sub> BrN <sub>2</sub> O <sub>4</sub> | C <sub>27</sub> H <sub>23</sub> BrN <sub>2</sub> O <sub>4</sub> |              |
| Mr                                 | 519.37                                                          | 519.38                                                          |              |
| D <sub>x</sub> ,g cm <sup>-3</sup> | 1.403                                                           | 1.403                                                           |              |

|                                                               |                                 |             |
|---------------------------------------------------------------|---------------------------------|-------------|
| Z                                                             | 4                               | 4           |
| Mu (mm <sup>-1</sup> )                                        | 2.570                           | 2.570       |
| F000                                                          | 1064.0                          | 1064.0      |
| F000'                                                         | 1064.14                         |             |
| h,k,lmax                                                      | 12,14,26                        | 12,13,26    |
| Nref                                                          | 4919 [2792]                     | 4766        |
| Tmin,Tmax                                                     | 0.567,0.598                     | 0.825,1.000 |
| Tmin'                                                         | 0.514                           |             |
| Correction method= # Reported T Limits: Tmin=0.825 Tmax=1.000 |                                 |             |
| AbsCorr = MULTI-SCAN                                          |                                 |             |
| Data completeness= 1.71/0.97                                  | Theta(max)= 72.992              |             |
| R(reflections)= 0.0322( 4696)                                 | wR2(reflections)= 0.0820( 4766) |             |
| S = 1.074                                                     | Npar= 309                       |             |
